# Supplementary material for: Late Mortality After COVID-19 Infection Among US Veterans vs Risk-Matched Comparators: A 2-Year Cohort Analysis
Source: PubMed Central journal article supplement (PMC10442778; doi:10.1001/jamainternmed.2023.3587), 2023-08-21
Supplement: jamainternmed-e233587-s002.pdf [file jamainternmed-e233587-s002.pdf]

-----  
-----  
-----

name:  
log: ...\\LTO Mortality\\Logs\\analysis\_lto\_mortality\_20230605.log  
log type: text  
opened on: 5 Jun 2023, 15:46:46

.  
.  
\*\*\*\*\*  
\*

. \* Project: LTO Mortality in COVID+ patients  
. \*  
. \* Author: Sarah Seelye  
. \*  
. \* Date Created: 2022 May 24  
. \* Date Updated: 2023 June 5

.  
\*\*\*\*\*  
\*

. \* open death dataset using Portland mortality definitions  
. use Data\\cohort\_dod\_allsrc, clear

. \* address duplicates  
. duplicates report patienticn

Duplicates in terms of patienticn

-----

| Copies | Observations | Surplus |
|--------|--------------|---------|
| 1      | 3147853      | 0       |
| 2      | 266          | 133     |

-----

. duplicates report patienticn birthdate

Duplicates in terms of patienticn birthdate

-----

| Copies | Observations | Surplus |
|--------|--------------|---------|
| 1      | 3147853      | 0       |
| 2      | 266          | 133     |

-----

. //all of the duplicates have the same birthdate and patienticn.  
. duplicates report patienticn scrssn\_numeric

Duplicates in terms of patienticn scrssn\_numeric

```
-----  
Copies | Observations      Surplus  
-----+-----  
1 |      3148119      0  
-----
```

```
.          //patienticn and SCRSSN uniquely identify patients, but SCRSSN  
is not  
.          //included in the matchedcohort dataset  
. duplicates tag patienticn, gen(dup)
```

Duplicates in terms of patienticn

```
. tab dup //266 duplicates; 133 unique Vets
```

```
-----  
dup |      Freq.      Percent      Cum.  
-----+-----  
0 | 3,147,853      99.99      99.99  
1 |      266      0.01      100.00  
-----+-----  
Total | 3,148,119      100.00
```

```
. bysort patienticn (scrssn): gen patientn = _n
```

```
. bysort patienticn: gen dod_notsame = 1 if  
best_death_date!=best_death_date[_n-1] & patientn==2  
(3,148,105 missing values generated)
```

```
. bysort patienticn: egen dod_notsame_pat = max(dod_notsame)  
(3,148,091 missing values generated)
```

```
. tab dod_notsame_pat patientn
```

```
dod_notsam |      patientn  
e_pat |      1      2 |      Total  
-----+-----+-----  
1 |      14      14 |      28  
-----+-----+-----  
Total |      14      14 |      28
```

```
.  
. * drop duplicates that have different birth dates  
. drop if dup==1 & dod_notsame_pat==1  
(28 observations deleted)
```

```
.  
. * drop duplicate patienticns for second SCRSSN on record  
. drop if patientn==2  
(119 observations deleted)
```

```
.  
. * keep variables for merge
```

```

. keep patienticn best_death_date

. destring patienticn, replace
patienticn: all characters numeric; replaced as long

.
. format best_death_date %td

.
. tempfile dod

. save `dod'
file D:\Temp\STATA\VHAANNSeelyS\ST_9a30_000001.tmp saved as .dta format

.
. * merge dod dataset with updated _datalong dataset(version 8/22/2022)
. use Data\matchedcohort_25to1_datalong, clear
(Created in file
'P:\ORD_Ioannou_202104007D\MethodsGroup\Programs\CORC_DataExplor)

. destring patienticn, replace
patienticn: all characters numeric; replaced as long

. format patienticn %12.0g

.
. merge m:1 patienticn using `dod'

```

| Result      | Number of obs |              |
|-------------|---------------|--------------|
| Not matched | 83            |              |
| from master | 83            | ( _merge==1) |
| from using  | 0             | ( _merge==2) |
| Matched     | 5,382,629     | ( _merge==3) |

```

. drop _merge

```

```

.
. *-----
. * Build 5:1 Matched Cohort
. *-----
.
. * drop comparators who aren't matched to cases
. tab ismatched_case

```

| case has a | Freq.     | Percent | Cum.   |
|------------|-----------|---------|--------|
| match?     |           |         |        |
| 0          | 776       | 0.01    | 0.01   |
| 1          | 5,381,936 | 99.99   | 100.00 |
| Total      | 5,382,712 | 100.00  |        |

```
. drop if ismatched_case==0
(776 observations deleted)
```

```
. count //n=5,381,936
5,381,936
```

```
. tab case //case=208,536
```

```
indicator: |
           is |
`index_dt` |
the date of |
the first   |
positive    |
covid-19   |
test result |
           for |
           Freq.   Percent   Cum.
-----+-----
           0 | 5,173,400   96.13   96.13
           1 |  208,536    3.87  100.00
-----+-----
Total     | 5,381,936  100.00
```

```
.
. * create a new index_dt variable to use the case's index date for all
controls
```

```
. gen index_dt_case = index_dt if case==1
(5,173,400 missing values generated)
```

```
. format index_dt_case %td
```

```
. gsort matchgroupnumber -case
```

```
. by matchgroupnumber: replace index_dt_case = index_dt_case[_n-1] if
index_dt_case[_n-1]!=.
(5173400 real changes made)
```

```
.
. * create an indextodeath variable to count number of days between
index date
```

```
. * and death
```

```
. gen indextodeath_caseindex = best_death_date-index_dt_case
(4,979,036 missing values generated)
```

```
. sum indextodeath_caseindex
```

```
Variable |      Obs      Mean   Std. dev.   Min   Max
-----+-----
indextodea~x | 402,900  287.2704  304.4486  -28306  881
```

```
. sum indextodeath_caseindex if indextodeath_caseindex<0
```

```
Variable |      Obs      Mean   Std. dev.   Min   Max
```

```
-----+-----
indextodeath~x |      11,653   -284.7707   1266.695   -28306   -1
```

```
.
. * drop indextodeath_caseindex<0 to exclude observations that die
before the
. * index date
. drop if indextodeath_caseindex<0
(11,653 observations deleted)
```

```
. tab case //case=208,063
```

```
indicator: |
           is |
`index_dt` |
the date of |
the first   |
positive    |
covid-19   |
test result |
           for |      Freq.      Percent      Cum.
-----+-----
           0 |  5,162,220      96.13      96.13
           1 |    208,063       3.87     100.00
-----+-----
        Total |  5,370,283     100.00
```

```
.
. * drop those with an infection date prior to index date
. * create time-to-infection variable
. gen ttinfection = futureinfectedcontrolindexdate - index_dt_case
(4,682,272 missing values generated)
```

```
.
. sum ttinfection
```

```
Variable |      Obs      Mean  Std. dev.      Min      Max
-----+-----
ttinfection |  688,011  338.3773  180.3509     -417     867
```

```
. sum ttinfection if ttinfection <0
```

```
Variable |      Obs      Mean  Std. dev.      Min      Max
-----+-----
ttinfection |    1,411  -61.74557  63.32246     -417     -1
```

```
. drop if ttinfection<0 //n=1411
(1,411 observations deleted)
```

```
. tab case //case=208,063
```

```
indicator: |
           is |
`index_dt` |
```

```

the date of |
the first |
positive |
covid-19 |
test result |
for |

```

|       | Freq.     | Percent | Cum.   |
|-------|-----------|---------|--------|
| 0     | 5,160,809 | 96.12   | 96.12  |
| 1     | 208,063   | 3.88    | 100.00 |
| Total | 5,368,872 | 100.00  |        |

```

.
. drop ttinfection

.
. * keep the best 5 matches
. gsort matchgroupnumber propensitiescoreabsdiffrank -case

. by matchgroupnumber: gen n = _n

. tab n

```

| n     | Freq.     | Percent | Cum.   |
|-------|-----------|---------|--------|
| 1     | 208,536   | 3.88    | 3.88   |
| 2     | 208,533   | 3.88    | 7.77   |
| 3     | 208,198   | 3.88    | 11.65  |
| 4     | 207,853   | 3.87    | 15.52  |
| 5     | 207,664   | 3.87    | 19.39  |
| 6     | 207,532   | 3.87    | 23.25  |
| 7     | 207,375   | 3.86    | 27.11  |
| 8     | 207,263   | 3.86    | 30.97  |
| 9     | 207,173   | 3.86    | 34.83  |
| 10    | 207,096   | 3.86    | 38.69  |
| 11    | 207,040   | 3.86    | 42.55  |
| 12    | 206,971   | 3.86    | 46.40  |
| 13    | 206,888   | 3.85    | 50.25  |
| 14    | 206,801   | 3.85    | 54.11  |
| 15    | 206,736   | 3.85    | 57.96  |
| 16    | 206,696   | 3.85    | 61.81  |
| 17    | 206,645   | 3.85    | 65.66  |
| 18    | 206,575   | 3.85    | 69.50  |
| 19    | 206,491   | 3.85    | 73.35  |
| 20    | 206,423   | 3.84    | 77.19  |
| 21    | 206,341   | 3.84    | 81.04  |
| 22    | 206,304   | 3.84    | 84.88  |
| 23    | 206,258   | 3.84    | 88.72  |
| 24    | 206,154   | 3.84    | 92.56  |
| 25    | 205,551   | 3.83    | 96.39  |
| 26    | 193,775   | 3.61    | 100.00 |
| Total | 5,368,872 | 100.00  |        |

```
.
. keep if n<=6
(4,120,556 observations deleted)
```

```
.
. tab n
```

| n     | Freq.     | Percent | Cum.   |
|-------|-----------|---------|--------|
| 1     | 208,536   | 16.71   | 16.71  |
| 2     | 208,533   | 16.71   | 33.41  |
| 3     | 208,198   | 16.68   | 50.09  |
| 4     | 207,853   | 16.65   | 66.74  |
| 5     | 207,664   | 16.64   | 83.38  |
| 6     | 207,532   | 16.62   | 100.00 |
| Total | 1,248,316 | 100.00  |        |

```
. tab n case
```

| n     | indicator: is<br>'index_dt' the date<br>of the first positive<br>covid-19 test result<br>for |         | Total     |
|-------|----------------------------------------------------------------------------------------------|---------|-----------|
|       | 0                                                                                            | 1       |           |
| 1     | 473                                                                                          | 208,063 | 208,536   |
| 2     | 208,533                                                                                      | 0       | 208,533   |
| 3     | 208,198                                                                                      | 0       | 208,198   |
| 4     | 207,853                                                                                      | 0       | 207,853   |
| 5     | 207,664                                                                                      | 0       | 207,664   |
| 6     | 207,532                                                                                      | 0       | 207,532   |
| Total | 1,040,253                                                                                    | 208,063 | 1,248,316 |

```
.
. bysort matchgroupnumber (n): egen totalpairs = max(n)
```

```
. tab totalpairs
```

| totalpairs | Freq.     | Percent | Cum.   |
|------------|-----------|---------|--------|
| 1          | 3         | 0.00    | 0.00   |
| 2          | 670       | 0.05    | 0.05   |
| 3          | 1,035     | 0.08    | 0.14   |
| 4          | 756       | 0.06    | 0.20   |
| 5          | 660       | 0.05    | 0.25   |
| 6          | 1,245,192 | 99.75   | 100.00 |
| Total      | 1,248,316 | 100.00  |        |

```
. tab totalpairs case // 3 patients - 2 cases - have no matched pair
```

```

| indicator: is
| `index_dt` the date
| of the first positive
| covid-19 test result
| for
totalpairs | 0 1 | Total
-----+-----+-----
1 | 1 2 | 3
2 | 335 335 | 670
3 | 691 344 | 1,035
4 | 567 189 | 756
5 | 528 132 | 660
6 | 1,038,131 207,061 | 1,245,192
-----+-----+-----
Total | 1,040,253 208,063 | 1,248,316

```

```

.
. * drop the 3 patients with no matched pair
. drop if totalpairs==1
(3 observations deleted)

```

```

. tab case //case=208,061

```

```

indicator: |
  is |
`index_dt` |
the date of |
the first |
positive |
covid-19 |
test result |
  for | Freq. Percent Cum.
-----+-----+-----
0 | 1,040,252 83.33 83.33
1 | 208,061 16.67 100.00
-----+-----+-----
Total | 1,248,313 100.00

```

```

.
. * confirm that all matched groups have a case
. bysort matchgroupnumber: egen groupwithacase = max(case)

```

```

. tab groupwithacase //2,829 comparators don't have a matched case

```

```

groupwithac |
  ase | Freq. Percent Cum.
-----+-----+-----
0 | 2,829 0.23 0.23
1 | 1,245,484 99.77 100.00
-----+-----+-----
Total | 1,248,313 100.00

```

```

.
. * drop comparator observations who don't have a matched case

```



```
. drop if groupwithacase==0 //2,829 comparators dropped
(2,829 observations deleted)

.
. * confirm that each case does not have more than 5 controls
. gen control = case==0

. by matchgroupnumber: egen totalcontrols = sum(control)

. tab totalcontrols if case==1
```

| totalcontro<br>ls | Freq.   | Percent | Cum.   |
|-------------------|---------|---------|--------|
| 1                 | 335     | 0.16    | 0.16   |
| 2                 | 344     | 0.17    | 0.33   |
| 3                 | 189     | 0.09    | 0.42   |
| 4                 | 132     | 0.06    | 0.48   |
| 5                 | 207,061 | 99.52   | 100.00 |
| Total             | 208,061 | 100.00  |        |

```
.
. * count
. tab case //n=1,245,484, of which 208,061 are cases
```

```
indicator: |
  is |
`index_dt` |
the date of |
the first |
positive |
covid-19 |
test result |
for |
```

|       | Freq.     | Percent | Cum.   |
|-------|-----------|---------|--------|
| 0     | 1,037,423 | 83.29   | 83.29  |
| 1     | 208,061   | 16.71   | 100.00 |
| Total | 1,245,484 | 100.00  |        |

```
.
. * drop variables no longer needed
. drop n totalpairs groupwithacase control totalcontrols
```

```
.
. * merge with covid+ hospitalization dataset
. merge 1:1 matchgroupnumber patienticn using
Data\Hospitalizations\lto_mortality_hospitalizations_20230516
```

| Result      | Number of obs         |
|-------------|-----------------------|
| Not matched | 1,237,206             |
| from master | 1,185,956 (_merge==1) |

```

        from using                    51,250  (_merge==2)

    Matched                          59,528  (_merge==3)
    -----

. drop if _merge==2
(51,250 observations deleted)

. drop _merge

. count //1,245,484
1,245,484

.
. recode index_hospitalization (.=0)
(1,185,956 changes made to index_hospitalization)

.
. * identify matchgroups in which the covid+ case was hospitalized/not
hospitalized
. gen case_hospitalized=index_hospitalization==1 if case==1
(1,037,423 missing values generated)

. bysort matchgroupnumber: egen case_hospitalized_matchgrp =
max(case_hospitalized)

.
. drop case_hospitalized

.
. *-----
. * Construct Covariates
. *-----

.
. * create a new unique patient id variable that combines patienticn &
matchgroupnumber
. tostring patienticn, gen(patienticn_str)
patienticn_str generated as str10

. tostring matchgroupnumber, gen(matchgroup_str)
matchgroup_str generated as str6

.
. gen uniq_patid_str = patienticn_str + matchgroup_str

. destring uniq_patid_str, gen(uniq_patid)
uniq_patid_str: all characters numeric; uniq_patid generated as double

. format uniq_patid %14.0g

.
. drop patienticn_str matchgroup_str uniq_patid_str

. duplicates report uniq_patid

```

Duplicates in terms of uniq\_patid

```
-----  
Copies | Observations      Surplus  
-----+-----  
1 |      1245484      0  
-----
```

```
.  
. * wave of infection  
.   * March-June 2020  
.   * July-Nov 2020  
.   * Dec 2020-Apr 2021  
.
```

```
. tab index_month
```

```
number of |  
months |  
*after* |  
march 2020 |  
when the |  
index date |  
occurs, |  
i.e., |  
0=march 20 |
```

|    | Freq.   | Percent | Cum.   |
|----|---------|---------|--------|
| 0  | 13,998  | 1.12    | 1.12   |
| 1  | 40,162  | 3.22    | 4.35   |
| 2  | 26,037  | 2.09    | 6.44   |
| 3  | 41,683  | 3.35    | 9.79   |
| 4  | 89,471  | 7.18    | 16.97  |
| 5  | 50,101  | 4.02    | 20.99  |
| 6  | 40,590  | 3.26    | 24.25  |
| 7  | 72,930  | 5.86    | 30.11  |
| 8  | 185,021 | 14.86   | 44.96  |
| 9  | 261,384 | 20.99   | 65.95  |
| 10 | 216,893 | 17.41   | 83.36  |
| 11 | 93,827  | 7.53    | 90.90  |
| 12 | 59,322  | 4.76    | 95.66  |
| 13 | 54,065  | 4.34    | 100.00 |

```
-----+-----  
Total | 1,245,484      100.00  
-----
```

```
.  
. gen wave = .  
(1,245,484 missing values generated)
```

```
. replace wave = 1 if inrange(index_month, 0, 3)  
(121,880 real changes made)
```

```
. replace wave = 2 if inrange(index_month, 4, 8)  
(438,113 real changes made)
```

```
. replace wave = 3 if inrange(index_month, 9, 13)
(685,491 real changes made)
```

```
. tab index_month wave
```

| number of<br>months<br>*after*<br>march 2020<br>when the<br>index date<br>occurs,<br>i.e.,<br>0=march 20 | wave    |         |         | Total     |
|----------------------------------------------------------------------------------------------------------|---------|---------|---------|-----------|
|                                                                                                          | 1       | 2       | 3       |           |
| 0                                                                                                        | 13,998  | 0       | 0       | 13,998    |
| 1                                                                                                        | 40,162  | 0       | 0       | 40,162    |
| 2                                                                                                        | 26,037  | 0       | 0       | 26,037    |
| 3                                                                                                        | 41,683  | 0       | 0       | 41,683    |
| 4                                                                                                        | 0       | 89,471  | 0       | 89,471    |
| 5                                                                                                        | 0       | 50,101  | 0       | 50,101    |
| 6                                                                                                        | 0       | 40,590  | 0       | 40,590    |
| 7                                                                                                        | 0       | 72,930  | 0       | 72,930    |
| 8                                                                                                        | 0       | 185,021 | 0       | 185,021   |
| 9                                                                                                        | 0       | 0       | 261,384 | 261,384   |
| 10                                                                                                       | 0       | 0       | 216,893 | 216,893   |
| 11                                                                                                       | 0       | 0       | 93,827  | 93,827    |
| 12                                                                                                       | 0       | 0       | 59,322  | 59,322    |
| 13                                                                                                       | 0       | 0       | 54,065  | 54,065    |
| Total                                                                                                    | 121,880 | 438,113 | 685,491 | 1,245,484 |

```
.
. * age categories
. sum ageatindexdate
```

| Variable       | Obs       | Mean     | Std. dev. | Min      | Max      |
|----------------|-----------|----------|-----------|----------|----------|
| ageatindexdate | 1,245,484 | 60.47358 | 16.41887  | 18.88493 | 99.99726 |

```
.
. gen agecat = .
(1,245,484 missing values generated)

. replace agecat=1 if ageatindexdate<65
(670,258 real changes made)

. replace agecat=2 if inrange(ageatindexdate, 65, 85)
(513,602 real changes made)

. replace agecat=3 if ageatindexdate>85
(61,624 real changes made)
```

```
. * create indicator for COVID+ cases
.gen infected = .
(1,245,484 missing values generated)
```

```
. replace infected = 1 if case==1
(208,061 real changes made)
```

```
. replace infected = 0 if case==0
(1,037,423 real changes made)
```

```
. * label values of categorical variables
.tab sex3cat infected
```

| sex of<br>veteran<br>(3-level) | infected  |         | Total     |
|--------------------------------|-----------|---------|-----------|
|                                | 0         | 1       |           |
| 0                              | 13,977    | 2,899   | 16,876    |
| 1                              | 109,085   | 21,936  | 131,021   |
| 2                              | 914,361   | 183,226 | 1,097,587 |
| Total                          | 1,037,423 | 208,061 | 1,245,484 |

```
. recode sex3cat 0=99
(16,876 changes made to sex3cat)
```

```
. lab def sex3cat 99 "Unknown" 1 "Female" 2 "Male", replace
```

```
. lab val sex3cat sex3cat
```

```
. tab sex3cat infected
```

| sex of<br>veteran<br>(3-level) | infected  |         | Total     |
|--------------------------------|-----------|---------|-----------|
|                                | 0         | 1       |           |
| Female                         | 109,085   | 21,936  | 131,021   |
| Male                           | 914,361   | 183,226 | 1,097,587 |
| Unknown                        | 13,977    | 2,899   | 16,876    |
| Total                          | 1,037,423 | 208,061 | 1,245,484 |

```
. tab race7cat infected
```

| race of<br>veteran<br>(7-level) | infected |        | Total   |
|---------------------------------|----------|--------|---------|
|                                 | 0        | 1      |         |
| 0                               | 63,531   | 12,851 | 76,382  |
| 1                               | 9,578    | 1,961  | 11,539  |
| 2                               | 10,536   | 2,081  | 12,617  |
| 3                               | 237,896  | 47,645 | 285,541 |

```

4 | 9,704 1,944 | 11,648
5 | 696,309 139,604 | 835,913
6 | 9,869 1,975 | 11,844
-----+-----+-----
Total | 1,037,423 208,061 | 1,245,484

```

```

. recode race7cat 0=99
(76,382 changes made to race7cat)

```

```

. lab def race7cat 1 "AmericanIndian/AlaskaNative" 2 "Asian" 3
"Black/AfricanAmer" ///
> 4 "NativeHawaiian/PacificIsland" 5
"White" 6 "MultipleRace" ///
> 99 "Missing" , replace

```

```

. lab val race7cat race7cat

```

```

. tab race7cat infected

```

| race of veteran<br>(7-level) | infected  |         | Total     |
|------------------------------|-----------|---------|-----------|
|                              | 0         | 1       |           |
| AmericanIndian/Alaska        | 9,578     | 1,961   | 11,539    |
| Asian                        | 10,536    | 2,081   | 12,617    |
| Black/AfricanAmer            | 237,896   | 47,645  | 285,541   |
| NativeHawaiian/Pacifi        | 9,704     | 1,944   | 11,648    |
| White                        | 696,309   | 139,604 | 835,913   |
| MultipleRace                 | 9,869     | 1,975   | 11,844    |
| Missing                      | 63,531    | 12,851  | 76,382    |
| Total                        | 1,037,423 | 208,061 | 1,245,484 |

```

. tab ethnicity3cat infected

```

| ethnicity<br>of veteran<br>(3-level) | infected  |         | Total     |
|--------------------------------------|-----------|---------|-----------|
|                                      | 0         | 1       |           |
| 0                                    | 35,330    | 7,106   | 42,436    |
| 1                                    | 99,093    | 20,280  | 119,373   |
| 2                                    | 903,000   | 180,675 | 1,083,675 |
| Total                                | 1,037,423 | 208,061 | 1,245,484 |

```

. recode ethnicity3cat 0=99
(42,436 changes made to ethnicity3cat)

```

```

. lab def ethnicity3cat 1 "Hispanic" 2 "NotHispanic" 99 "Missing",
replace

```

```

. lab val ethnicity3cat ethnicity3cat

```

```

. tab ethnicity3cat infected, nol

```

```

ethnicity |
of veteran |          infected
(3-level) |          0          1 |          Total
-----+-----+-----
      1 |    99,093    20,280 |    119,373
      2 |   903,000   180,675 |  1,083,675
     99 |    35,330     7,106 |    42,436
-----+-----+-----
    Total | 1,037,423   208,061 |  1,245,484

```

```

.
. tab rurality2cat infected

```

```

rurality |
of |
veteran's |
home zip |
code |          infected
(2-level) |          0          1 |          Total
-----+-----+-----
      0 |   294,989    59,064 |   354,053
      1 |   742,434   148,997 |   891,431
-----+-----+-----
    Total | 1,037,423   208,061 |  1,245,484

```

```

. lab def rurality2cat 0 "NotUrban" 1 "Urban", replace

```

```

. lab val rurality2cat rurality2cat

```

```

. tab rurality2cat infected

```

```

rurality |
of |
veteran's |
home zip |
code |          infected
(2-level) |          0          1 |          Total
-----+-----+-----
NotUrban |   294,989    59,064 |   354,053
Urban    |   742,434   148,997 |   891,431
-----+-----+-----
    Total | 1,037,423   208,061 |  1,245,484

```

```

.
. tab smoking4cat infected

```

```

smoking |
status of |
veteran |          infected
(4-level) |          0          1 |          Total
-----+-----+-----
      0 |    57,618    12,115 |    69,733
      1 |   131,249    26,144 |   157,393

```

|                   |           |         |           |
|-------------------|-----------|---------|-----------|
| 2                 | 439,908   | 88,025  | 527,933   |
| 3                 | 408,648   | 81,777  | 490,425   |
| -----+-----+----- |           |         |           |
| Total             | 1,037,423 | 208,061 | 1,245,484 |

. recode smoking4cat 0=99  
(69,733 changes made to smoking4cat)

. lab def smoking4cat 1 "Current" 2 "Former" 3 "Never" 99 "Missing",  
replace

. lab val smoking4cat smoking4cat

. tab smoking4cat infected

| smoking<br>status of<br>veteran<br>(4-level) | infected  |         | Total     |
|----------------------------------------------|-----------|---------|-----------|
|                                              | 0         | 1       |           |
| Current                                      | 131,249   | 26,144  | 157,393   |
| Former                                       | 439,908   | 88,025  | 527,933   |
| Never                                        | 408,648   | 81,777  | 490,425   |
| Missing                                      | 57,618    | 12,115  | 69,733    |
| -----+-----+-----                            |           |         |           |
| Total                                        | 1,037,423 | 208,061 | 1,245,484 |

.  
. tab immuno infected

| immunosupp<br>ressed? | infected  |         | Total     |
|-----------------------|-----------|---------|-----------|
|                       | 0         | 1       |           |
| 0                     | 936,167   | 187,748 | 1,123,915 |
| 1                     | 101,256   | 20,313  | 121,569   |
| -----+-----+-----     |           |         |           |
| Total                 | 1,037,423 | 208,061 | 1,245,484 |

. tab clcatindexdate infected

| clc care<br>received<br>before or<br>on index<br>date | infected  |         | Total     |
|-------------------------------------------------------|-----------|---------|-----------|
|                                                       | 0         | 1       |           |
| 0                                                     | 1,027,879 | 205,899 | 1,233,778 |
| 1                                                     | 9,544     | 2,162   | 11,706    |
| -----+-----+-----                                     |           |         |           |
| Total                                                 | 1,037,423 | 208,061 | 1,245,484 |

.  
. tab nosos11cat infected



| nosos<br>(11-level) | infected  |         | Total     |
|---------------------|-----------|---------|-----------|
|                     | 0         | 1       |           |
| 0                   | 25,455    | 4,789   | 30,244    |
| 1                   | 26,035    | 5,694   | 31,729    |
| 2                   | 45,530    | 9,582   | 55,112    |
| 3                   | 60,994    | 12,431  | 73,425    |
| 4                   | 75,933    | 15,159  | 91,092    |
| 5                   | 90,104    | 17,707  | 107,811   |
| 6                   | 105,586   | 20,526  | 126,112   |
| 7                   | 119,913   | 23,431  | 143,344   |
| 8                   | 136,532   | 26,893  | 163,425   |
| 9                   | 157,063   | 31,294  | 188,357   |
| 10                  | 194,278   | 40,555  | 234,833   |
| Total               | 1,037,423 | 208,061 | 1,245,484 |

```
. recode nosos11cat 0=99
(30,244 changes made to nosos11cat)
```

```
. tab nosos11cat infected
```

| nosos<br>(11-level) | infected  |         | Total     |
|---------------------|-----------|---------|-----------|
|                     | 0         | 1       |           |
| 1                   | 26,035    | 5,694   | 31,729    |
| 2                   | 45,530    | 9,582   | 55,112    |
| 3                   | 60,994    | 12,431  | 73,425    |
| 4                   | 75,933    | 15,159  | 91,092    |
| 5                   | 90,104    | 17,707  | 107,811   |
| 6                   | 105,586   | 20,526  | 126,112   |
| 7                   | 119,913   | 23,431  | 143,344   |
| 8                   | 136,532   | 26,893  | 163,425   |
| 9                   | 157,063   | 31,294  | 188,357   |
| 10                  | 194,278   | 40,555  | 234,833   |
| 99                  | 25,455    | 4,789   | 30,244    |
| Total               | 1,037,423 | 208,061 | 1,245,484 |

```
. tab canscore7cat infected
```

| can score<br>(7-level) | infected  |         | Total     |
|------------------------|-----------|---------|-----------|
|                        | 0         | 1       |           |
| 0                      | 20,816    | 4,056   | 24,872    |
| 1                      | 170,471   | 34,417  | 204,888   |
| 2                      | 160,008   | 31,900  | 191,908   |
| 3                      | 194,475   | 38,219  | 232,694   |
| 4                      | 235,676   | 46,759  | 282,435   |
| 5                      | 153,135   | 30,638  | 183,773   |
| 6                      | 102,842   | 22,072  | 124,914   |
| Total                  | 1,037,423 | 208,061 | 1,245,484 |

```
. recode canscore7cat 0=99
(24,872 changes made to canscore7cat)
```

```
. tab canscore7cat infected
```

| can score | infected  |         | Total     |
|-----------|-----------|---------|-----------|
| (7-level) | 0         | 1       |           |
| 1         | 170,471   | 34,417  | 204,888   |
| 2         | 160,008   | 31,900  | 191,908   |
| 3         | 194,475   | 38,219  | 232,694   |
| 4         | 235,676   | 46,759  | 282,435   |
| 5         | 153,135   | 30,638  | 183,773   |
| 6         | 102,842   | 22,072  | 124,914   |
| 99        | 20,816    | 4,056   | 24,872    |
| Total     | 1,037,423 | 208,061 | 1,245,484 |

```
.
. *-----
. * Time to Study End
. *-----
.
. * identify study end as April 1, 2022
. gen studyend = mdy(4, 1, 2022)

. format studyend %td

.
. * count days from index to studyend
. gen ttstudyend = studyend-index_dt_case

.
. *-----
. * Mortality Variables
. *-----
.
. * Alive on day 91
. gen alive_day91 = .
(1,245,484 missing values generated)

. replace alive_day91 = 1 if indextodeath_caseindex>=91
(1,221,670 real changes made)

. replace alive_day91 = 0 if inrange(indextodeath_caseindex, 0, 90)
(23,814 real changes made)

. replace alive_day91 = 0 if ttstudyend<91
(0 real changes made)

. bysort alive_day91: sum indextodeath_caseindex
```

---

```
-----  
-----  
-> alive_day91 = 0
```

| Variable     | Obs    | Mean     | Std. dev. | Min | Max |
|--------------|--------|----------|-----------|-----|-----|
| -----+-----  |        |          |           |     |     |
| indextodea~x | 23,814 | 32.98224 | 25.4598   | 0   | 90  |

```
-----  
-----
```

```
-----  
-----  
-> alive_day91 = 1
```

| Variable     | Obs    | Mean     | Std. dev. | Min | Max |
|--------------|--------|----------|-----------|-----|-----|
| -----+-----  |        |          |           |     |     |
| indextodea~x | 72,781 | 360.3306 | 166.2994  | 91  | 881 |

```
.  
. * Alive on day 181  
. gen alive_day181 = .  
(1,245,484 missing values generated)  
  
. replace alive_day181 = 1 if indextodeath_caseindex>=181  
(1,209,311 real changes made)  
  
. replace alive_day181 = 0 if inrange(indextodeath_caseindex, 0, 180)  
(36,173 real changes made)  
  
. replace alive_day181 = 0 if ttstudyend<181  
(0 real changes made)  
  
. bysort alive_day181: sum indextodeath_caseindex
```

```
-----  
-----  
-----  
-----  
-> alive_day181 = 0
```

| Variable     | Obs    | Mean     | Std. dev. | Min | Max |
|--------------|--------|----------|-----------|-----|-----|
| -----+-----  |        |          |           |     |     |
| indextodea~x | 36,173 | 67.94139 | 54.91375  | 0   | 180 |

```
-----  
-----  
-----
```

```
-----  
-----  
-> alive_day181 = 1
```

| Variable     | Obs    | Mean     | Std. dev. | Min | Max |
|--------------|--------|----------|-----------|-----|-----|
| -----+-----  |        |          |           |     |     |
| indextodea~x | 60,422 | 406.3589 | 143.8607  | 181 | 881 |

```
.  
.
```

```

. * Alive on day 366
. gen alive_day366 = .
(1,245,484 missing values generated)

. replace alive_day366 = 1 if indextodeath_caseindex>=366
(1,183,181 real changes made)

. replace alive_day366 = 0 if inrange(indextodeath_caseindex, 0, 365)
(62,303 real changes made)

. replace alive_day366 = 0 if ttstudyend<366
(52,071 real changes made)

. bysort alive_day366: sum indextodeath_caseindex

```

-----  
-----  
-----

-> alive\_day366 = 0

| Variable               | Obs    | Mean     | Std. dev. | Min | Max |
|------------------------|--------|----------|-----------|-----|-----|
| indextodeath_caseindex | 62,734 | 156.0614 | 116.8082  | 0   | 498 |

-----  
-----  
-----

-> alive\_day366 = 1

| Variable               | Obs    | Mean     | Std. dev. | Min | Max |
|------------------------|--------|----------|-----------|-----|-----|
| indextodeath_caseindex | 33,861 | 508.5585 | 103.4674  | 366 | 881 |

```

.
. * Died Index Day-Day 90
. gen died_0_90 = .
(1,245,484 missing values generated)

. replace died_0_90 = 1 if inrange(indextodeath_caseindex, 0, 90)
(23,814 real changes made)

. replace died_0_90 = 0 if indextodeath_caseindex>90
(1,221,670 real changes made)

. tab died_0_90, m

```

| died_0_90 | Freq.     | Percent | Cum.   |
|-----------|-----------|---------|--------|
| 0         | 1,221,670 | 98.09   | 98.09  |
| 1         | 23,814    | 1.91    | 100.00 |
| Total     | 1,245,484 | 100.00  |        |

```

.
. * Died Day 91-Day 180
. gen died_91_180 = .
(1,245,484 missing values generated)

. replace died_91_180 = 1 if inrange(indextodeath_caseindex, 91, 180)
(12,359 real changes made)

. replace died_91_180 = 0 if indextodeath_caseindex>180
(1,209,311 real changes made)

. replace died_91_180 = 0 if (indextodeath_caseindex>ttstudyend) &
(inrange(indextodeath_caseindex, 91, 180)) ///
>
& (inrange(ttstudyend, 91, 180))
(0 real changes made)

```

```

. tab died_91_180, m

```

| died_91_180 | Freq.     | Percent | Cum.   |
|-------------|-----------|---------|--------|
| 0           | 1,209,311 | 97.10   | 97.10  |
| 1           | 12,359    | 0.99    | 98.09  |
| .           | 23,814    | 1.91    | 100.00 |
| Total       | 1,245,484 | 100.00  |        |

```

. sum indextodeath_caseindex if indextodeath_caseindex<91

```

| Variable     | Obs    | Mean     | Std. dev. | Min | Max |
|--------------|--------|----------|-----------|-----|-----|
| indextodea~x | 23,814 | 32.98224 | 25.4598   | 0   | 90  |

```

.
. * Died Day 181-Day 365
. gen died_181_365 = .
(1,245,484 missing values generated)

. replace died_181_365 = 1 if inrange(indextodeath_caseindex, 181, 365)
(26,130 real changes made)

. replace died_181_365 = 0 if indextodeath_caseindex>365
(1,183,181 real changes made)

. replace died_181_365 = 0 if (indextodeath_caseindex>ttstudyend) &
(inrange(indextodeath_caseindex, 181, 365)) ///
>
& (inrange(ttstudyend, 181, 365))
(63 real changes made)

```

```

. tab died_181_365, m

```

| died_181_36 | Freq. | Percent | Cum. |
|-------------|-------|---------|------|
| 5           |       |         |      |

```
-----+-----
```

|             |  |           |        |        |
|-------------|--|-----------|--------|--------|
| 0           |  | 1,183,244 | 95.00  | 95.00  |
| 1           |  | 26,067    | 2.09   | 97.10  |
| .           |  | 36,173    | 2.90   | 100.00 |
| -----+----- |  |           |        |        |
| Total       |  | 1,245,484 | 100.00 |        |

```
. sum indextodeath_caseindex if indextodeath_caseindex<181
```

```
-----+-----
```

| Variable     |  | Obs    | Mean     | Std. dev. | Min | Max |
|--------------|--|--------|----------|-----------|-----|-----|
| indextodea~x |  | 36,173 | 67.94139 | 54.91375  | 0   | 180 |

```
.
. * Died Day 366-730
. gen died_366_730 = .
(1,245,484 missing values generated)

. replace died_366_730 = 1 if inrange(indextodeath_caseindex, 366, 730)
(32,904 real changes made)

. replace died_366_730 = 0 if indextodeath_caseindex>730
(1,150,277 real changes made)

. replace died_366_730 = 0 if (indextodeath_caseindex>ttstudyend) &
(inrange(indextodeath_caseindex, 366, 730)) ///
>
& (inrange(ttstudyend, 366, 730))
(12,316 real changes made)

. tab died_366_730, m
```

```
died_366_73 |
```

|             |  | Freq.     | Percent | Cum.   |
|-------------|--|-----------|---------|--------|
| 0           |  | 1,162,593 | 93.34   | 93.34  |
| 1           |  | 20,588    | 1.65    | 95.00  |
| .           |  | 62,303    | 5.00    | 100.00 |
| -----+----- |  |           |         |        |
| Total       |  | 1,245,484 | 100.00  |        |

```
. sum indextodeath_caseindex if indextodeath_caseindex<366
```

```
-----+-----
```

| Variable     |  | Obs    | Mean     | Std. dev. | Min | Max |
|--------------|--|--------|----------|-----------|-----|-----|
| indextodea~x |  | 62,303 | 154.2197 | 115.0548  | 0   | 365 |

```
.
. * Died Day 0-365
. gen died_0_365 = .
(1,245,484 missing values generated)

. replace died_0_365 = 1 if inrange(indextodeath_caseindex, 0, 365)
(62,303 real changes made)
```

```

. replace died_0_365 = 0 if indextodeath_caseindex>365
(1,183,181 real changes made)

. replace died_0_365 = 0 if (indextodeath_caseindex>ttstudyend) &
(inrange(indextodeath_caseindex, 0, 365)) ///
>
& (inrange(ttstudyend, 0, 365))
(63 real changes made)

.
. * Died Day 0-730
. gen died_0_730 = .
(1,245,484 missing values generated)

. replace died_0_730 = 1 if inrange(indextodeath_caseindex, 0, 730)
(95,207 real changes made)

. replace died_0_730 = 0 if indextodeath_caseindex>730
(1,150,277 real changes made)

. replace died_0_730 = 0 if (indextodeath_caseindex>ttstudyend) &
(inrange(indextodeath_caseindex, 0, 730)) ///
>
& (inrange(ttstudyend, 0, 730))
(12,810 real changes made)

.
. * Died Day 91-730
. gen died_91_730 = .
(1,245,484 missing values generated)

. replace died_91_730 = 1 if inrange(indextodeath_caseindex, 91, 730)
(71,393 real changes made)

. replace died_91_730 = 0 if indextodeath_caseindex>730
(1,150,277 real changes made)

. replace died_91_730 = 0 if (indextodeath_caseindex>ttstudyend) &
(inrange(indextodeath_caseindex, 91, 730)) ///
>
& (inrange(ttstudyend, 91, 730))
>
(12,810 real changes made)

.
. *-----
. * Time to Event Variables
. *-----
.
. * alive on index day, censored at 90 days
. gen tte_0_90 = ttstudyend

. replace tte_0_90 = 90 if ttstudyend>90

```

(1,245,484 real changes made)

```
. replace tte_0_90 = indextodeath_caseindex ///  
> if indextodeath_caseindex  
indextodeath_caseindex<90  
(23,659 real changes made)
```

```
.  
. * alive on Day 91, censored at 180 days  
. gen tte_91_180 = ttstudyend
```

```
. replace tte_91_180 = 180 if ttstudyend>180  
(1,245,484 real changes made)
```

```
. replace tte_91_180 = indextodeath_caseindex if ///  
> indextodeath_caseindex  
inrange(indextodeath_caseindex, 91, 180)  
(12,195 real changes made)
```

```
. replace tte_91_180 = . if alive_day91==0  
(23,814 real changes made, 23,814 to missing)
```

```
.  
. * alive on Day 181, censored at 365 days  
. gen tte_181_365 = ttstudyend
```

```
. replace tte_181_365 = 365 if ttstudyend>365  
(1,191,419 real changes made)
```

```
. replace tte_181_365 = indextodeath_caseindex if ///  
> indextodeath_caseindex  
inrange(indextodeath_caseindex, 181, 365)  
(25,921 real changes made)
```

```
. replace tte_181_365 = . if alive_day181==0  
(36,173 real changes made, 36,173 to missing)
```

```
.  
. * alive on Day 366, censored at 730 days  
. gen tte_366_730 = ttstudyend
```

```
. replace tte_366_730 = 730 if ttstudyend>730  
(13,998 real changes made)
```

```
. replace tte_366_730 = indextodeath_caseindex if ///  
> indextodeath_caseindex  
inrange(indextodeath_caseindex, 366, 730)  
(20,049 real changes made)
```

```
. replace tte_366_730 = . if alive_day366==0  
(114,374 real changes made, 114,374 to missing)
```

```
.  
. * alive on index day, censored at 365 days
```



```

. gen tte_0_365 = ttstudyend

. replace tte_0_365 = 365 if ttstudyend>365
(1,191,419 real changes made)

. replace tte_0_365 = indextodeath_caseindex if ///
>                                     indextodeath_caseindex
indextodeath_caseindex<365
(62,094 real changes made)

.
. * alive on index day, censored at 730 days
. gen tte_0_730 = ttstudyend

. replace tte_0_730 = 730 if ttstudyend>730
(13,998 real changes made)

. replace tte_0_730 = indextodeath_caseindex if ///
>                                     indextodeath_caseindex
indextodeath_caseindex<730
(82,285 real changes made)

.
. * alive on Day 91, censored at 730 days
. gen tte_91_730 = ttstudyend

. replace tte_91_730 = 730 if ttstudyend>730
(13,998 real changes made)

. replace tte_91_730 = indextodeath_caseindex if ///
>                                     indextodeath_caseindex
inrange(indextodeath_caseindex, 91, 730)
(58,471 real changes made)

. replace tte_91_730 = . if alive_day91==0
(23,814 real changes made, 23,814 to missing)

.
. *-----
-----
. * for each period, identify whether the case and at least one
comparator
. * in a matched group are alive on the first day of the period
. *-----
-----

.
. ** Index Day, Day 0 **
.           * Each match group in dataset has at least one case and one
comparator alive
.           * on index day
.
. ** Alive on Day 91, 181, 366 **
.
. foreach i of numlist 91 181 366 {

```

```

2.
.      //cases
.      gen alive_day`i' _case = 0
3.      replace alive_day`i' _case = 1 if case==1 & alive_day`i'==1
4.      replace alive_day`i' _case = 0 if case==1 & ttstudyend<`i'
5.      tab alive_day`i' _case alive_day`i' if case==1
6.      sum indextodeath if indextodeath<`i' & case==1
7.
.      bysort matchgroupnumber: egen alive_day`i' _case_grp =
max(alive_day`i' _case)
8.
.
.      //comparators
.      gen alive_day`i' _control = 0
9.      replace alive_day`i' _control = 1 if case==0 &
alive_day`i'==1
10.     replace alive_day`i' _control = 0 if case==0 &
ttstudyend<`i'
11.
.      tab alive_day`i' _control alive_day`i' if case==0
12.     sum indextodeath if indextodeath<`i' & case==0
13.
.      bysort matchgroupnumber: egen alive_day`i' _control_num =
sum(alive_day`i' _control)
14.
.      //case and at least one comparator alive on day`i'
.      gen alive_day`i' _casecontrol = 0
15.     replace alive_day`i' _casecontrol = 1 if
alive_day`i' _case_grp==1 & alive_day`i' _control_num>=1
16.
.      tab alive_day`i' _casecontrol case
17.
.      //drop variables we no longer need
.      drop alive_day`i' _case alive_day`i' _case_grp
alive_day`i' _control alive_day`i' _control_num
18.
. }
(195,646 real changes made)
(0 real changes made)

```

| alive_day9 | alive_day91 |         |         |
|------------|-------------|---------|---------|
| 1_case     | 0           | 1       | Total   |
| 0          | 12,415      | 0       | 12,415  |
| 1          | 0           | 195,646 | 195,646 |
| Total      | 12,415      | 195,646 | 208,061 |

| Variable     | Obs    | Mean     | Std. dev. | Min | Max |
|--------------|--------|----------|-----------|-----|-----|
| indextodea~x | 12,415 | 22.35747 | 19.79229  | 0   | 90  |

(1,026,024 real changes made)  
(0 real changes made)

| alive_day9 |        | alive_day91 |           |  |
|------------|--------|-------------|-----------|--|
| 1_control  | 0      | 1           | Total     |  |
| 0          | 11,399 | 0           | 11,399    |  |
| 1          | 0      | 1,026,024   | 1,026,024 |  |
| Total      | 11,399 | 1,026,024   | 1,037,423 |  |

| Variable     | Obs    | Mean   | Std. dev. | Min | Max |
|--------------|--------|--------|-----------|-----|-----|
| indextodea~x | 11,399 | 44.554 | 25.89809  | 0   | 90  |

(1,171,141 real changes made)

indicator: is  
`index\_dt` the date  
of the first positive  
covid-19 test result

| alive_day9 |           | 1_casecont |           |  |
|------------|-----------|------------|-----------|--|
| rol        | 0         | 1          | Total     |  |
| 0          | 61,924    | 12,419     | 74,343    |  |
| 1          | 975,499   | 195,642    | 1,171,141 |  |
| Total      | 1,037,423 | 208,061    | 1,245,484 |  |

(193,602 real changes made)  
(0 real changes made)

| alive_day1 |        | alive_day181 |         |  |
|------------|--------|--------------|---------|--|
| 81_case    | 0      | 1            | Total   |  |
| 0          | 14,459 | 0            | 14,459  |  |
| 1          | 0      | 193,602      | 193,602 |  |
| Total      | 14,459 | 193,602      | 208,061 |  |

| Variable     | Obs    | Mean     | Std. dev. | Min | Max |
|--------------|--------|----------|-----------|-----|-----|
| indextodea~x | 14,459 | 38.05222 | 43.91964  | 0   | 180 |

(1,015,709 real changes made)  
(0 real changes made)

| alive_day1 |        | alive_day181 |           |  |
|------------|--------|--------------|-----------|--|
| 81_control | 0      | 1            | Total     |  |
| 0          | 21,714 | 0            | 21,714    |  |
| 1          | 0      | 1,015,709    | 1,015,709 |  |
| Total      | 21,714 | 1,015,709    | 1,037,423 |  |

| Variable     | Obs    | Mean     | Std. dev. | Min | Max |
|--------------|--------|----------|-----------|-----|-----|
| indextodea~x | 21,714 | 87.84411 | 52.42273  | 0   | 180 |

(1,158,905 real changes made)

```

| indicator: is
| `index_dt` the date
| of the first positive
alive_day1 | covid-19 test result
81_casecon | for
  trol | 0 1 | Total
-----+-----+-----
0 | 72,113 14,466 | 86,579
1 | 965,310 193,595 | 1,158,905
-----+-----+-----
Total | 1,037,423 208,061 | 1,245,484
(181,657 real changes made)
(0 real changes made)

```

```

alive_day3 | alive_day366
66_case | 0 1 | Total
-----+-----+-----
0 | 26,404 0 | 26,404
1 | 0 181,657 | 181,657
-----+-----+-----
Total | 26,404 181,657 | 208,061

```

```

Variable | Obs Mean Std. dev. Min Max
-----+-----+-----+-----+-----
indextodea~x | 17,900 83.07486 103.0125 0 365
(949,453 real changes made)
(0 real changes made)

```

```

alive_day3 | alive_day366
66_control | 0 1 | Total
-----+-----+-----
0 | 87,970 0 | 87,970
1 | 0 949,453 | 949,453
-----+-----+-----
Total | 87,970 949,453 | 1,037,423

```

```

Variable | Obs Mean Std. dev. Min Max
-----+-----+-----+-----+-----
indextodea~x | 44,403 182.9 106.9272 0 365
(1,087,503 real changes made)

```

```

| indicator: is
| `index_dt` the date
| of the first positive
alive_day3 | covid-19 test result
66_casecon | for
  trol | 0 1 | Total
-----+-----+-----
0 | 131,567 26,414 | 157,981
1 | 905,856 181,647 | 1,087,503
-----+-----+-----
Total | 1,037,423 208,061 | 1,245,484

```

```

. * Save dataset for use in tables and Cox models
. *save Data\mortality_varforcox_20230516, replace
.
. *-----
. * ITT Results
. *-----
.
. use Data\mortality_varforcox_20230516, clear
(Created in file
'P:\ORD_Ioannou_202104007D\MethodsGroup\Programs\CORC_DataExplor)

```

```

. * excess deaths (Results)
. tab died_0_730 infected, co

```

```

+-----+
| Key          |
|-----|
| frequency    |
| column percentage |
+-----+

```

| died_0_730 | infected            |                   | Total               |
|------------|---------------------|-------------------|---------------------|
|            | 0                   | 1                 |                     |
| 0          | 975,435<br>94.02    | 187,652<br>90.19  | 1,163,087<br>93.38  |
| 1          | 61,988<br>5.98      | 20,409<br>9.81    | 82,397<br>6.62      |
| Total      | 1,037,423<br>100.00 | 208,061<br>100.00 | 1,245,484<br>100.00 |

```

. di 20409/208061 // 0.09809143 - mortality rate of cases
.09809143

```

```

. di 61988/1037423 // 0.0597519 - moratlity rate of comparators
.0597519

```

```

. di 208061*0.0597519 //12432.04 - number case deaths if comparator rate
12432.04

```

```

. di 20409-12432.04 //7976.96 excess deaths
7976.96

```

```

. * Overall *

```

```

. * 90-day mortality for cases and comparators who are alive on index
day

```

```

. tab died_0_90 infected , co

```

```

+-----+
| Key |
|-----|
| frequency |
| column percentage |
+-----+

```

| died_0_90 | infected  |         | Total     |
|-----------|-----------|---------|-----------|
|           | 0         | 1       |           |
| 0         | 1,026,024 | 195,646 | 1,221,670 |
|           | 98.90     | 94.03   | 98.09     |
| 1         | 11,399    | 12,415  | 23,814    |
|           | 1.10      | 5.97    | 1.91      |
| Total     | 1,037,423 | 208,061 | 1,245,484 |
|           | 100.00    | 100.00  | 100.00    |

```
. cs died_0_90 infected
```

|                 | infected       |           | Total                |
|-----------------|----------------|-----------|----------------------|
|                 | Exposed        | Unexposed |                      |
| Cases           | 12415          | 11399     | 23814                |
| Noncases        | 195646         | 1026024   | 1221670              |
| Total           | 208061         | 1037423   | 1245484              |
| Risk            | .05967         | .0109878  | .0191203             |
|                 | Point estimate |           | [95% conf. interval] |
| Risk difference | .0486822       |           | .0476448 .0497196    |
| Risk ratio      | 5.430567       |           | 5.296565 5.567959    |
| Attr. frac. ex. | .8158572       |           | .8111984 .820401     |
| Attr. frac. pop | .4253324       |           |                      |

```
chi2(1) = 21899.73 Pr>chi2 = 0.0000
```

```

.
. * 180-day mortality for cases and comparators who are alive on day 91
&
. * with case and at least one comparator from matchgroup alive
. tab died_91_180 infected if alive_day91_casecontrol==1 , co

```

```

+-----+
| Key |
|-----|
| frequency |
| column percentage |
+-----+

```

```
died_91_18 | infected
```

|       | 0                 | 1                 | Total               |
|-------|-------------------|-------------------|---------------------|
| 0     | 955,483<br>99.01  | 193,598<br>98.96  | 1,149,081<br>99.00  |
| 1     | 9,514<br>0.99     | 2,044<br>1.04     | 11,558<br>1.00      |
| Total | 964,997<br>100.00 | 195,642<br>100.00 | 1,160,639<br>100.00 |

. cs died\_91\_180 infected if alive\_day91\_casecontrol==1

|                 | infected       |           | Total                 |
|-----------------|----------------|-----------|-----------------------|
|                 | Exposed        | Unexposed |                       |
| Cases           | 2044           | 9514      | 11558                 |
| Noncases        | 193598         | 955483    | 1149081               |
| Total           | 195642         | 964997    | 1160639               |
| Risk            | .0104477       | .0098591  | .0099583              |
|                 | Point estimate |           | [95% conf. interval]  |
| Risk difference | .0005886       |           | .0000968 .0010803     |
| Risk ratio      | 1.059697       |           | 1.010503 1.111285     |
| Attr. frac. ex. | .0563338       |           | .0103938 .1001412     |
| Attr. frac. pop | .0099625       |           |                       |
| chi2(1) =       |                |           | 5.72 Pr>chi2 = 0.0168 |

. \* 365-day mortality for cases and comparators who are alive on day 181 & not censored  
. tab died\_181\_365 infected if alive\_day181\_casecontrol==1 , co

```
+-----+
| Key          |
|-----|
| frequency    |
| column percentage |
+-----+
```

| died_181_365 | infected         |                  | Total              |
|--------------|------------------|------------------|--------------------|
|              | 0                | 1                |                    |
| 0            | 925,006<br>97.82 | 190,163<br>98.23 | 1,115,169<br>97.89 |
| 1            | 20,594<br>2.18   | 3,432<br>1.77    | 24,026<br>2.11     |
| Total        | 945,600          | 193,595          | 1,139,195          |

| 100.00 100.00 | 100.00

. cs died\_181\_365 infected if alive\_day181\_casecontrol==1

|                 | infected         |           |                      |
|-----------------|------------------|-----------|----------------------|
|                 | Exposed          | Unexposed | Total                |
| Cases           | 3432             | 20594     | 24026                |
| Noncases        | 190163           | 925006    | 1115169              |
| Total           | 193595           | 945600    | 1139195              |
| Risk            | .0177277         | .0217788  | .0210903             |
|                 | Point estimate   |           | [95% conf. interval] |
| Risk difference | -.004051         |           | -.0047084 -.0033937  |
| Risk ratio      | .8139916         |           | .7853629 .8436638    |
| Prev. frac. ex. | .1860084         |           | .1563362 .2146371    |
| Prev. frac. pop | .0316103         |           |                      |
|                 | chi2(1) = 127.73 |           | Pr>chi2 = 0.0000     |

. \* 730-day mortality for cases and comparators who are alive on day 366 & not censored

. tab died\_366\_730 infected if alive\_day366\_casecontrol==1 , co

```
+-----+
| Key |
|-----|
| frequency |
| column percentage |
+-----+
```

| died_366_7 | infected |         |           |
|------------|----------|---------|-----------|
| 30         | 0        | 1       | Total     |
| 0          | 852,355  | 179,130 | 1,031,485 |
|            | 98.22    | 98.61   | 98.29     |
| 1          | 15,481   | 2,517   | 17,998    |
|            | 1.78     | 1.39    | 1.71      |
| Total      | 867,836  | 181,647 | 1,049,483 |
|            | 100.00   | 100.00  | 100.00    |

. cs died\_366\_730 infected if alive\_day366\_casecontrol==1

|          | infected |           |         |
|----------|----------|-----------|---------|
|          | Exposed  | Unexposed | Total   |
| Cases    | 2517     | 15481     | 17998   |
| Noncases | 179130   | 852355    | 1031485 |



|                                   |                |          |                      |
|-----------------------------------|----------------|----------|----------------------|
| Total                             | 181647         | 867836   | 1049483              |
| Risk                              | .0138565       | .0178386 | .0171494             |
|                                   | Point estimate |          | [95% conf. interval] |
| Risk difference                   | -.0039821      |          | -.0045875 - .0033767 |
| Risk ratio                        | .7767721       |          | .7449587 .8099442    |
| Prev. frac. ex.                   | .2232279       |          | .1900558 .2550413    |
| Prev. frac. pop                   | .0386368       |          |                      |
| chi2(1) = 141.31 Pr>chi2 = 0.0000 |                |          |                      |

```
.
. *-----
. * Age <65
. *-----
.
. * 90-day mortality for cases and comparators who are alive on day 1
. tab died_0_90 infected if agecat==1 & ttstudyend>=0, co
```

| +-----+           |          |         |         |
|-------------------|----------|---------|---------|
| Key               |          |         |         |
| frequency         |          |         |         |
| column percentage |          |         |         |
| +-----+           |          |         |         |
| died_0_90         | infected |         | Total   |
|                   | 0        | 1       |         |
| 0                 | 553,541  | 113,650 | 667,191 |
|                   | 99.70    | 98.79   | 99.54   |
| 1                 | 1,676    | 1,391   | 3,067   |
|                   | 0.30     | 1.21    | 0.46    |
| Total             | 555,217  | 115,041 | 670,258 |
|                   | 100.00   | 100.00  | 100.00  |

```
. cs died_0_90 infected if agecat==1 & ttstudyend>=0
```

| +-----+  |                |           |                      |
|----------|----------------|-----------|----------------------|
|          | infected       |           | Total                |
|          | Exposed        | Unexposed |                      |
| +-----+  |                |           |                      |
| Cases    | 1391           | 1676      | 3067                 |
| Noncases | 113650         | 553541    | 667191               |
| Total    | 115041         | 555217    | 670258               |
| Risk     | .0120913       | .0030186  | .0045758             |
|          | Point estimate |           | [95% conf. interval] |

|                 |          |          |          |
|-----------------|----------|----------|----------|
| Risk difference | .0090727 | .0084249 | .0097205 |
| Risk ratio      | 4.00556  | 3.731753 | 4.299456 |
| Attr. frac. ex. | .750347  | .7320294 | .7674125 |
| Attr. frac. pop | .3403106 |          |          |

chi2(1) = 1722.13 Pr>chi2 = 0.0000

```
. * 180-day mortality for cases and comparators who are alive on day 91
. tab died_91_180 infected if alive_day91_casecontrol==1 & agecat==1 &
ttstudyend>=91, co
```

```
+-----+
| Key |
|-----|
| frequency |
| column percentage |
+-----+
```

| died_91_18 | infected |         | Total   |
|------------|----------|---------|---------|
| 0          | 0        | 1       |         |
| 0          | 521,865  | 113,344 | 635,209 |
|            | 99.73    | 99.73   | 99.73   |
| 1          | 1,400    | 303     | 1,703   |
|            | 0.27     | 0.27    | 0.27    |
| Total      | 523,265  | 113,647 | 636,912 |
|            | 100.00   | 100.00  | 100.00  |

```
. cs died_91_180 infected if alive_day91_casecontrol==1 & agecat==1 &
ttstudyend>=91
```

|                 | infected       |           | Total                |
|-----------------|----------------|-----------|----------------------|
|                 | Exposed        | Unexposed |                      |
| Cases           | 303            | 1400      | 1703                 |
| Noncases        | 113344         | 521865    | 635209               |
| Total           | 113647         | 523265    | 636912               |
| Risk            | .0026662       | .0026755  | .0026738             |
|                 | Point estimate |           | [95% conf. interval] |
| Risk difference | -9.36e-06      |           | -.0003402 .0003215   |
| Risk ratio      | .9965023       |           | .8802729 1.128078    |
| Prev. frac. ex. | .0034977       |           | -.1280784 .1197271   |
| Prev. frac. pop | .0006241       |           |                      |

chi2(1) = 0.00 Pr>chi2 = 0.9558

```

. * 365-day mortality for cases and comparators who are alive on day 181
& not censored
. tab died_181_365 infected if alive_day181_casecontrol==1 & agecat==1 &
ttstudyend>=181, co

```

```

+-----+
| Key          |
|-----|
| frequency    |
| column percentage |
+-----+

```

| died_181_365 | infected          |                   | Total             |
|--------------|-------------------|-------------------|-------------------|
|              | 0                 | 1                 |                   |
| 0            | 513,794<br>99.39  | 112,816<br>99.53  | 626,610<br>99.41  |
| 1            | 3,178<br>0.61     | 528<br>0.47       | 3,706<br>0.59     |
| Total        | 516,972<br>100.00 | 113,344<br>100.00 | 630,316<br>100.00 |

```

. cs died_181_365 infected if alive_day181_casecontrol==1 & agecat==1 &
ttstudyend>=181

```

|                                  | infected       |           | Total                |
|----------------------------------|----------------|-----------|----------------------|
|                                  | Exposed        | Unexposed |                      |
| Cases                            | 528            | 3178      | 3706                 |
| Noncases                         | 112816         | 513794    | 626610               |
| Total                            | 113344         | 516972    | 630316               |
| Risk                             | .0046584       | .0061473  | .0058796             |
|                                  | Point estimate |           | [95% conf. interval] |
| Risk difference                  | -.0014889      |           | -.001939 - .0010389  |
| Risk ratio                       | .7577894       |           | .6912628 .8307184    |
| Prev. frac. ex.                  | .2422106       |           | .1692816 .3087372    |
| Prev. frac. pop                  | .0435545       |           |                      |
| chi2(1) = 35.26 Pr>chi2 = 0.0000 |                |           |                      |

```

. * 730-day mortality for cases and comparators who are alive on day 366
& not censored
. tab died_366_730 infected if alive_day366_casecontrol==1 & agecat==1 &
ttstudyend>=366, co

```

```

+-----+

```

```

| Key |
|-----|
| frequency |
| column percentage |
+-----+

```

| died_366_7_30 | infected |         | Total   |
|---------------|----------|---------|---------|
|               | 0        | 1       |         |
| 0             | 476,993  | 106,579 | 583,572 |
|               | 99.51    | 99.64   | 99.53   |
| 1             | 2,364    | 390     | 2,754   |
|               | 0.49     | 0.36    | 0.47    |
| Total         | 479,357  | 106,969 | 586,326 |
|               | 100.00   | 100.00  | 100.00  |

```

. cs died_366_730 infected if alive_day366_casecontrol==1 & agecat==1 &
ttstudyend>=366

```

|                 | infected       |           | Total                |
|-----------------|----------------|-----------|----------------------|
|                 | Exposed        | Unexposed |                      |
| Cases           | 390            | 2364      | 2754                 |
| Noncases        | 106579         | 476993    | 583572               |
| Total           | 106969         | 479357    | 586326               |
| Risk            | .0036459       | .0049316  | .004697              |
|                 | Point estimate |           | [95% conf. interval] |
| Risk difference | -.0012857      |           | -.0016977 - .0008736 |
| Risk ratio      | .7392959       |           | .6643324 .8227183    |
| Prev. frac. ex. | .2607041       |           | .1772817 .3356676    |
| Prev. frac. pop | .0475627       |           |                      |

```

chi2(1) = 30.92 Pr>chi2 = 0.0000

```

```

.
. *-----
. * Age 65-85
. *-----
.
. * 90-day mortality for cases and comparators who are alive on day 1
. tab died_0_90 infected if agecat==2 & ttstudyend>=0, co

```

```

+-----+
| Key |
|-----|
| frequency |
| column percentage |
+-----+

```

| died_0_90 | infected          |                  | Total             |
|-----------|-------------------|------------------|-------------------|
|           | 0                 | 1                |                   |
| 0         | 424,483<br>98.42  | 74,472<br>90.49  | 498,955<br>97.15  |
| 1         | 6,818<br>1.58     | 7,829<br>9.51    | 14,647<br>2.85    |
| Total     | 431,301<br>100.00 | 82,301<br>100.00 | 513,602<br>100.00 |

. cs died\_0\_90 infected if agecat==2 & ttstudyend>=0

|                                     | infected       |           | Total                |
|-------------------------------------|----------------|-----------|----------------------|
|                                     | Exposed        | Unexposed |                      |
| Cases                               | 7829           | 6818      | 14647                |
| Noncases                            | 74472          | 424483    | 498955               |
| Total                               | 82301          | 431301    | 513602               |
| Risk                                | .0951264       | .015808   | .0285182             |
|                                     | Point estimate |           | [95% conf. interval] |
| Risk difference                     | .0793184       |           | .0772797 .0813571    |
| Risk ratio                          | 6.017618       |           | 5.830439 6.210807    |
| Attr. frac. ex.                     | .8338213       |           | .8284863 .8389903    |
| Attr. frac. pop                     | .4456876       |           |                      |
| chi2(1) = 15694.61 Pr>chi2 = 0.0000 |                |           |                      |

. \* 180-day mortality for cases and comparators who are alive on day 91  
. tab died\_91\_180 infected if alive\_day91\_casecontrol==1 & agecat==2 & ttstudyend>=91, co

```
+-----+
| Key |
|-----|
| frequency |
| column percentage |
+-----+
```

| died_91_18 | infected         |                 | Total            |
|------------|------------------|-----------------|------------------|
|            | 0                | 1               |                  |
| 0          | 391,280<br>98.55 | 73,211<br>98.31 | 464,491<br>98.51 |
| 1          | 5,753<br>1.45    | 1,260<br>1.69   | 7,013<br>1.49    |

|       | Exposed | Unexposed | Total   |
|-------|---------|-----------|---------|
| Total | 397,033 | 74,471    | 471,504 |
|       | 100.00  | 100.00    | 100.00  |

. cs died\_91\_180 infected if alive\_day91\_casecontrol==1 & agecat==2 & ttstudyend>=91

|                                  | infected       |                      | Total    |
|----------------------------------|----------------|----------------------|----------|
|                                  | Exposed        | Unexposed            |          |
| Cases                            | 1260           | 5753                 | 7013     |
| Noncases                         | 73211          | 391280               | 464491   |
| Total                            | 74471          | 397033               | 471504   |
| Risk                             | .0169193       | .01449               | .0148737 |
|                                  | Point estimate | [95% conf. interval] |          |
| Risk difference                  | .0024294       | .0014313             | .0034274 |
| Risk ratio                       | 1.167658       | 1.099154             | 1.240431 |
| Attr. frac. ex.                  | .1435847       | .0902098             | .1938283 |
| Attr. frac. pop                  | .0257973       |                      |          |
| chi2(1) = 25.26 Pr>chi2 = 0.0000 |                |                      |          |

. \* 365-day mortality for cases and comparators who are alive on day 181 & not censored  
. tab died\_181\_365 infected if alive\_day181\_casecontrol==1 & agecat==2 & ttstudyend>=181, co

```
+-----+
| Key          |
|-----|
| frequency    |
| column percentage |
+-----+
```

| died_181_3 | infected |        | Total   |
|------------|----------|--------|---------|
|            | 0        | 1      |         |
| 65         | 0        | 1      |         |
| 0          | 374,071  | 71,093 | 445,164 |
|            | 96.70    | 97.11  | 96.77   |
| 1          | 12,754   | 2,116  | 14,870  |
|            | 3.30     | 2.89   | 3.23    |
| Total      | 386,825  | 73,209 | 460,034 |
|            | 100.00   | 100.00 | 100.00  |

. cs died\_181\_365 infected if alive\_day181\_casecontrol==1 & agecat==2 & ttstudyend>=181

|                 | infected       |           | Total                  |
|-----------------|----------------|-----------|------------------------|
|                 | Exposed        | Unexposed |                        |
| Cases           | 2116           | 12754     | 14870                  |
| Noncases        | 71093          | 374071    | 445164                 |
| Total           | 73209          | 386825    | 460034                 |
| Risk            | .0289036       | .032971   | .0323237               |
|                 | Point estimate |           | [95% conf. interval]   |
| Risk difference | -.0040674      |           | -.0054051 - .0027297   |
| Risk ratio      | .876636        |           | .8377907 .9172825      |
| Prev. frac. ex. | .123364        |           | .0827175 .1622093      |
| Prev. frac. pop | .0196319       |           |                        |
| chi2(1) =       |                |           | 32.56 Pr>chi2 = 0.0000 |

```
.
. * 730-day mortality for cases and comparators who are alive on day 366
& not censored
. tab died_366_730 infected if alive_day366_casecontrol==1 & agecat==2 &
ttstudyend>=366, co
```

```
+-----+
| Key |
|-----|
| frequency |
| column percentage |
+-----+
```

| died_366_7 | infected |        | Total   |
|------------|----------|--------|---------|
|            | 0        | 1      |         |
| 0          | 343,610  | 67,016 | 410,626 |
|            | 97.29    | 97.69  | 97.36   |
| 1          | 9,562    | 1,586  | 11,148  |
|            | 2.71     | 2.31   | 2.64    |
| Total      | 353,172  | 68,602 | 421,774 |
|            | 100.00   | 100.00 | 100.00  |

```
. cs died_366_730 infected if alive_day366_casecontrol==1 & agecat==2 &
ttstudyend>=366
```

|          | infected |           | Total  |
|----------|----------|-----------|--------|
|          | Exposed  | Unexposed |        |
| Cases    | 1586     | 9562      | 11148  |
| Noncases | 67016    | 343610    | 410626 |
| Total    | 68602    | 353172    | 421774 |

|                 | Point estimate | [95% conf. interval] |           |
|-----------------|----------------|----------------------|-----------|
| Risk            | .0231189       | .0270746             | .0264312  |
| Risk difference | -.0039558      | -.0052012            | -.0027103 |
| Risk ratio      | .8538939       | .8102154             | .8999272  |
| Prev. frac. ex. | .1461061       | .1000728             | .1897846  |
| Prev. frac. pop | .0237643       |                      |           |

chi2(1) = 34.93 Pr>chi2 = 0.0000

```

.
. *-----
. * Age 85+
. *-----
.
. * 90-day mortality for cases and comparators who are alive on day 1
. tab died_0_90 infected if agecat==3 & ttstudyend>=0, co

```

```

+-----+
| Key |
|-----|
| frequency |
| column percentage |
+-----+

```

| died_0_90 | infected |        | Total  |
|-----------|----------|--------|--------|
|           | 0        | 1      |        |
| 0         | 48,000   | 7,524  | 55,524 |
|           | 94.29    | 70.19  | 90.10  |
| 1         | 2,905    | 3,195  | 6,100  |
|           | 5.71     | 29.81  | 9.90   |
| Total     | 50,905   | 10,719 | 61,624 |
|           | 100.00   | 100.00 | 100.00 |

```

. cs died_0_90 infected if agecat==3 & ttstudyend>=0

```

|                 | infected       |           | Total                |
|-----------------|----------------|-----------|----------------------|
|                 | Exposed        | Unexposed |                      |
| Cases           | 3195           | 2905      | 6100                 |
| Noncases        | 7524           | 48000     | 55524                |
| Total           | 10719          | 50905     | 61624                |
| Risk            | .2980688       | .0570671  | .0989874             |
|                 | Point estimate |           | [95% conf. interval] |
| Risk difference | .2410018       |           | .2321112 .2498923    |



|                 |          |          |          |
|-----------------|----------|----------|----------|
| Risk ratio      | 5.223131 | 4.989677 | 5.467507 |
| Attr. frac. ex. | .8085439 | .7995862 | .8171013 |
| Attr. frac. pop | .4234915 |          |          |

-----  
 chi2(1) = 5766.26 Pr>chi2 = 0.0000

. \* 180-day mortality for cases and comparators who are alive on day 91  
 . tab died\_91\_180 infected if alive\_day91\_casecontrol==1 & agecat==3 &  
 ttstudyend>=91, co

+-----+  
 | Key |  
 |-----|  
 | frequency |  
 | column percentage |  
 +-----+

| died_91_18 | infected         |                 | Total            |
|------------|------------------|-----------------|------------------|
|            | 0                | 1               |                  |
| 0          | 42,338<br>94.72  | 7,043<br>93.61  | 49,381<br>94.56  |
| 1          | 2,361<br>5.28    | 481<br>6.39     | 2,842<br>5.44    |
| Total      | 44,699<br>100.00 | 7,524<br>100.00 | 52,223<br>100.00 |

. cs died\_91\_180 infected if alive\_day91\_casecontrol==1 & agecat==3 &  
 ttstudyend>=91

|                 | infected       |           | Total                |
|-----------------|----------------|-----------|----------------------|
|                 | Exposed        | Unexposed |                      |
| Cases           | 481            | 2361      | 2842                 |
| Noncases        | 7043           | 42338     | 49381                |
| Total           | 7524           | 44699     | 52223                |
| Risk            | .0639288       | .05282    | .0544205             |
|                 | Point estimate |           | [95% conf. interval] |
| Risk difference | .0111088       |           | .0052052 .0170124    |
| Risk ratio      | 1.210314       |           | 1.100674 1.330876    |
| Attr. frac. ex. | .1737682       |           | .0914654 .2486153    |
| Attr. frac. pop | .0294098       |           |                      |

-----  
 chi2(1) = 15.44 Pr>chi2 = 0.0001

. \* 365-day mortality for cases and comparators who are alive on day 181

& not censored

. tab died\_181\_365 infected if alive\_day181\_casecontrol==1 & agecat==3 & ttstudyend>=181, co

```

+-----+
| Key          |
|-----|
| frequency    |
| column percentage |
+-----+

```

| died_181_365 | infected |        | Total  |
|--------------|----------|--------|--------|
|              | 0        | 1      |        |
| 0            | 37,141   | 6,254  | 43,395 |
|              | 88.85    | 88.81  | 88.84  |
| 1            | 4,662    | 788    | 5,450  |
|              | 11.15    | 11.19  | 11.16  |
| Total        | 41,803   | 7,042  | 48,845 |
|              | 100.00   | 100.00 | 100.00 |

. cs died\_181\_365 infected if alive\_day181\_casecontrol==1 & agecat==3 & ttstudyend>=181

|                                 | infected       |           | Total                |
|---------------------------------|----------------|-----------|----------------------|
|                                 | Exposed        | Unexposed |                      |
| Cases                           | 788            | 4662      | 5450                 |
| Noncases                        | 6254           | 37141     | 43395                |
| Total                           | 7042           | 41803     | 48845                |
| Risk                            | .1119          | .1115231  | .1115774             |
|                                 | Point estimate |           | [95% conf. interval] |
| Risk difference                 | .0003769       |           | -.0075803 .0083341   |
| Risk ratio                      | 1.00338        |           | .9344751 1.077365    |
| Attr. frac. ex.                 | .0033685       |           | -.0701195 .0718098   |
| Attr. frac. pop                 | .000487        |           |                      |
| chi2(1) = 0.01 Pr>chi2 = 0.9260 |                |           |                      |

. \* 730-day mortality for cases and comparators who are alive on day 366 & not censored

. tab died\_366\_730 infected if alive\_day366\_casecontrol==1 & agecat==3 & ttstudyend>=366, co

```

+-----+
| Key          |
|-----|

```

```

|      frequency      |
| column percentage  |
+-----+

```

| died_366_7_30 | infected         |                 | Total            |
|---------------|------------------|-----------------|------------------|
| 0             | 31,752<br>89.93  | 5,535<br>91.10  | 37,287<br>90.10  |
| 1             | 3,555<br>10.07   | 541<br>8.90     | 4,096<br>9.90    |
| Total         | 35,307<br>100.00 | 6,076<br>100.00 | 41,383<br>100.00 |

```

. cs died_366_730 infected if alive_day366_casecontrol==1 & agecat==3 &
ttstudyend>=366

```

|                                            | infected       |           | Total                |
|--------------------------------------------|----------------|-----------|----------------------|
|                                            | Exposed        | Unexposed |                      |
| Cases                                      | 541            | 3555      | 4096                 |
| Noncases                                   | 5535           | 31752     | 37287                |
| Total                                      | 6076           | 35307     | 41383                |
| Risk                                       | .0890388       | .1006882  | .0989778             |
|                                            | Point estimate |           | [95% conf. interval] |
| Risk difference                            | -.0116494      |           | -.0194682 - .0038306 |
| Risk ratio                                 | .8843022       |           | .8112224 .9639655    |
| Prev. frac. ex.                            | .1156978       |           | .0360345 .1887776    |
| Prev. frac. pop                            | .0169872       |           |                      |
| +-----+<br>chi2(1) = 7.89 Pr>chi2 = 0.0050 |                |           |                      |

```

.
. *-----
. * Wave 1
. *-----
.
. * 90-day mortality for cases and comparators who are alive on day 1
. tab died_0_90 infected if wave==1 & ttstudyend>=0, co

```

```

+-----+
| Key      |
|-----|
| frequency |
| column percentage |
+-----+

```

```

|      infected

```

| died_0_90 | 0                 | 1                | Total             |
|-----------|-------------------|------------------|-------------------|
| 0         | 99,999<br>98.48   | 18,259<br>89.80  | 118,258<br>97.03  |
| 1         | 1,547<br>1.52     | 2,075<br>10.20   | 3,622<br>2.97     |
| Total     | 101,546<br>100.00 | 20,334<br>100.00 | 121,880<br>100.00 |

. cs died\_0\_90 infected if wave==1 & ttstudyend>=0

|                                    | infected       |           | Total                |
|------------------------------------|----------------|-----------|----------------------|
|                                    | Exposed        | Unexposed |                      |
| Cases                              | 2075           | 1547      | 3622                 |
| Noncases                           | 18259          | 99999     | 118258               |
| Total                              | 20334          | 101546    | 121880               |
| Risk                               | .1020458       | .0152345  | .0297178             |
|                                    | Point estimate |           | [95% conf. interval] |
| Risk difference                    | .0868114       |           | .0825831 .0910397    |
| Risk ratio                         | 6.698349       |           | 6.28251 7.141713     |
| Attr. frac. ex.                    | .8507095       |           | .840828 .8599776     |
| Attr. frac. pop                    | .4873612       |           |                      |
| chi2(1) = 4427.84 Pr>chi2 = 0.0000 |                |           |                      |

. \* 180-day mortality for cases and comparators who are alive on day 91  
. tab died\_91\_180 infected if alive\_day91\_casecontrol==1 & wave==1 & ttstudyend>=91, co

```

+-----+
| Key          |
+-----+
| frequency    |
| column percentage |
+-----+

```

| died_91_18 | infected        |                 | Total            |
|------------|-----------------|-----------------|------------------|
| 0          | 0               | 1               |                  |
| 0          | 88,661<br>98.65 | 17,947<br>98.29 | 106,608<br>98.59 |
| 1          | 1,217<br>1.35   | 312<br>1.71     | 1,529<br>1.41    |
| Total      | 89,878          | 18,259          | 108,137          |

| 100.00 100.00 | 100.00

. cs died\_91\_180 infected if alive\_day91\_casecontrol==1 & wave==1 & ttstudyend>=91

|                 | infected       |           |                        |
|-----------------|----------------|-----------|------------------------|
|                 | Exposed        | Unexposed | Total                  |
| Cases           | 312            | 1217      | 1529                   |
| Noncases        | 17947          | 88661     | 106608                 |
| Total           | 18259          | 89878     | 108137                 |
| Risk            | .0170875       | .0135406  | .0141395               |
|                 | Point estimate |           | [95% conf. interval]   |
| Risk difference | .0035469       |           | .0015209 .0055728      |
| Risk ratio      | 1.261945       |           | 1.115499 1.427617      |
| Attr. frac. ex. | .2075724       |           | .1035404 .2995318      |
| Attr. frac. pop | .0423562       |           |                        |
| chi2(1) =       |                |           | 13.70 Pr>chi2 = 0.0002 |

. \* 365-day mortality for cases and comparators who are alive on day 181 & not censored  
 . tab died\_181\_365 infected if alive\_day181\_casecontrol==1 & wave==1 & ttstudyend>=181, co

```
+-----+
| Key          |
|-----|
| frequency    |
| column percentage |
+-----+
```

| died_181_3 | infected |        |         |
|------------|----------|--------|---------|
| 65         | 0        | 1      | Total   |
| 0          | 84,668   | 17,491 | 102,159 |
|            | 97.13    | 97.47  | 97.19   |
| 1          | 2,501    | 454    | 2,955   |
|            | 2.87     | 2.53   | 2.81    |
| Total      | 87,169   | 17,945 | 105,114 |
|            | 100.00   | 100.00 | 100.00  |

. cs died\_181\_365 infected if alive\_day181\_casecontrol==1 & wave==1 & ttstudyend>=181

|  | infected |           |       |
|--|----------|-----------|-------|
|  | Exposed  | Unexposed | Total |

|                                 | Cases          | Noncases | Total                | Risk     |
|---------------------------------|----------------|----------|----------------------|----------|
|                                 | 454            | 17491    | 17945                | .0252995 |
|                                 | 2501           | 84668    | 87169                | .0286914 |
|                                 | 2955           | 102159   | 105114               | .0281123 |
|                                 | Point estimate |          | [95% conf. interval] |          |
| Risk difference                 | -.0033919      |          | -.0059427            | -.000841 |
| Risk ratio                      | .8817811       |          | .7989165             | .9732404 |
| Prev. frac. ex.                 | .1182189       |          | .0267596             | .2010835 |
| Prev. frac. pop                 | .0201823       |          |                      |          |
| chi2(1) = 6.27 Pr>chi2 = 0.0123 |                |          |                      |          |

```
.
. * 730-day mortality for cases and comparators who are alive on day 366
& not censored
. tab died_366_730 infected if alive_day366_casecontrol==1 & wave==1 &
ttstudyend>=181, co
```

| Key        | frequency |        | column percentage |
|------------|-----------|--------|-------------------|
| died_366_7 | infected  |        |                   |
| 30         | 0         | 1      | Total             |
| 0          | 78,914    | 16,785 | 95,699            |
|            | 95.53     | 95.96  | 95.60             |
| 1          | 3,694     | 706    | 4,400             |
|            | 4.47      | 4.04   | 4.40              |
| Total      | 82,608    | 17,491 | 100,099           |
|            | 100.00    | 100.00 | 100.00            |

```
. cs died_366_730 infected if alive_day366_casecontrol==1 & wave==1 &
ttstudyend>=181
```

|          | infected |           | Total    |
|----------|----------|-----------|----------|
|          | Exposed  | Unexposed |          |
| Cases    | 706      | 3694      | 4400     |
| Noncases | 16785    | 78914     | 95699    |
| Total    | 17491    | 82608     | 100099   |
| Risk     | .0403636 | .0447172  | .0439565 |

|                 | Point estimate | [95% conf. interval] |           |
|-----------------|----------------|----------------------|-----------|
| Risk difference | -.0043536      | -.007593             | -.0011142 |
| Risk ratio      | .9026415       | .8342144             | .9766813  |
| Prev. frac. ex. | .0973585       | .0233187             | .1657856  |
| Prev. frac. pop | .0170121       |                      |           |

chi2(1) = 6.51 Pr>chi2 = 0.0107

```

.
. *-----
. * Wave 2
. *-----
.
. * 90-day mortality for cases and comparators who are alive on day 1
. tab died_0_90 infected if wave==2 & ttstudyend>=0, co

```

```

+-----+
| Key |
|-----|
| frequency |
| column percentage |
+-----+

```

| died_0_90 | infected |        | Total   |
|-----------|----------|--------|---------|
|           | 0        | 1      |         |
| 0         | 360,765  | 68,942 | 429,707 |
|           | 98.86    | 94.21  | 98.08   |
| 1         | 4,167    | 4,239  | 8,406   |
|           | 1.14     | 5.79   | 1.92    |
| Total     | 364,932  | 73,181 | 438,113 |
|           | 100.00   | 100.00 | 100.00  |

```

. cs died_0_90 infected if wave==2 & ttstudyend>=0

```

|          | infected |           | Total    |
|----------|----------|-----------|----------|
|          | Exposed  | Unexposed |          |
| Cases    | 4239     | 4167      | 8406     |
| Noncases | 68942    | 360765    | 429707   |
| Total    | 73181    | 364932    | 438113   |
| Risk     | .0579249 | .0114186  | .0191868 |

  

|                 | Point estimate | [95% conf. interval] |          |
|-----------------|----------------|----------------------|----------|
| Risk difference | .0465063       | .0447791             | .0482335 |
| Risk ratio      | 5.072868       | 4.864157             | 5.290533 |
| Attr. frac. ex. | .8028728       | .7944145             | .8109831 |

```
Attr. frac. pop | .4048748 |
+-----+
chi2(1) = 7005.81 Pr>chi2 = 0.0000
```

```
.
. * 180-day mortality for cases and comparators who are alive on day 91
. tab died_91_180 infected if alive_day91_casecontrol==1 & wave==2 &
ttstudyend>=91, co
```

```
+-----+
| Key |
|-----|
| frequency |
| column percentage |
+-----+
```

| died_91_18 | infected          |                  | Total             |
|------------|-------------------|------------------|-------------------|
|            | 0                 | 1                |                   |
| 0          | 336,264<br>98.93  | 68,230<br>98.97  | 404,494<br>98.94  |
| 1          | 3,633<br>1.07     | 712<br>1.03      | 4,345<br>1.06     |
| Total      | 339,897<br>100.00 | 68,942<br>100.00 | 408,839<br>100.00 |

```
. cs died_91_180 infected if alive_day91_casecontrol==1 & wave==2 &
ttstudyend>=91
```

|                 | infected       |           | Total                |
|-----------------|----------------|-----------|----------------------|
|                 | Exposed        | Unexposed |                      |
| Cases           | 712            | 3633      | 4345                 |
| Noncases        | 68230          | 336264    | 404494               |
| Total           | 68942          | 339897    | 408839               |
| Risk            | .0103275       | .0106885  | .0106277             |
|                 | Point estimate |           | [95% conf. interval] |
| Risk difference | -.000361       |           | -.0011911 .0004691   |
| Risk ratio      | .9662245       |           | .8920176 1.046605    |
| Prev. frac. ex. | .0337755       |           | -.0466047 .1079824   |
| Prev. frac. pop | .0056955       |           |                      |

```
chi2(1) = 0.71 Pr>chi2 = 0.3993
```

```
.
. * 365-day mortality for cases and comparators who are alive on day 181
& not censored
. tab died_181_365 infected if alive_day181_casecontrol==1 & wave==2 &
```



```
ttstudyend>=181, co
```

```
+-----+
| Key          |
|-----|
| frequency    |
| column percentage |
+-----+
```

| died_181_365 | infected          |                  | Total             |
|--------------|-------------------|------------------|-------------------|
|              | 0                 | 1                |                   |
| 0            | 326,114<br>97.99  | 67,092<br>98.33  | 393,206<br>98.05  |
| 1            | 6,695<br>2.01     | 1,137<br>1.67    | 7,832<br>1.95     |
| Total        | 332,809<br>100.00 | 68,229<br>100.00 | 401,038<br>100.00 |

```
. cs died_181_365 infected if alive_day181_casecontrol==1 & wave==2 &
ttstudyend>=181
```

|                                  | infected       |           | Total                |
|----------------------------------|----------------|-----------|----------------------|
|                                  | Exposed        | Unexposed |                      |
| Cases                            | 1137           | 6695      | 7832                 |
| Noncases                         | 67092          | 326114    | 393206               |
| Total                            | 68229          | 332809    | 401038               |
| Risk                             | .0166645       | .0201166  | .0195293             |
|                                  | Point estimate |           | [95% conf. interval] |
| Risk difference                  | -.0034522      |           | -.0045246 - .0023797 |
| Risk ratio                       | .8283921       |           | .7783378 .8816653    |
| Prev. frac. ex.                  | .1716079       |           | .1183347 .2216622    |
| Prev. frac. pop                  | .0291958       |           |                      |
| chi2(1) = 35.24 Pr>chi2 = 0.0000 |                |           |                      |

```
.
. * 730-day mortality for cases and comparators who are alive on day 366
& not censored
. tab died_366_730 infected if alive_day366_casecontrol==1 & wave==2 &
ttstudyend>=366, co
```

```
+-----+
| Key          |
|-----|
| frequency    |
| column percentage |
+-----+
```

+-----+

| died_366_7 | infected |        | Total   |
|------------|----------|--------|---------|
| 30         | 0        | 1      |         |
| 0          | 313,659  | 66,001 | 379,660 |
|            | 97.79    | 98.37  | 97.89   |
| 1          | 7,098    | 1,091  | 8,189   |
|            | 2.21     | 1.63   | 2.11    |
| Total      | 320,757  | 67,092 | 387,849 |
|            | 100.00   | 100.00 | 100.00  |

. cs died\_366\_730 infected if alive\_day366\_casecontrol==1 & wave==2 & ttstudyend>=366

|                 | infected                         |           | Total                |
|-----------------|----------------------------------|-----------|----------------------|
|                 | Exposed                          | Unexposed |                      |
| Cases           | 1091                             | 7098      | 8189                 |
| Noncases        | 66001                            | 313659    | 379660               |
| Total           | 67092                            | 320757    | 387849               |
| Risk            | .0162613                         | .0221289  | .0211139             |
|                 | Point estimate                   |           | [95% conf. interval] |
| Risk difference | -.0058676                        |           | -.0069517 - .0047836 |
| Risk ratio      | .7348423                         |           | .6898441 .7827757    |
| Prev. frac. ex. | .2651577                         |           | .2172243 .3101559    |
| Prev. frac. pop | .0458683                         |           |                      |
|                 | chi2(1) = 92.43 Pr>chi2 = 0.0000 |           |                      |

.  
 . \*-----  
 . \* Wave 3  
 . \*-----  
 .  
 . \* 90-day mortality for cases and comparators who are alive on day 1  
 . tab died\_0\_90 infected if wave==3 & ttstudyend>=0, co

+-----+  
 | Key |  
 |-----|  
 | frequency |  
 | column percentage |  
 +-----+

| died_0_90 | infected |   | Total |
|-----------|----------|---|-------|
|           | 0        | 1 |       |

|       |         |         |         |
|-------|---------|---------|---------|
| 0     | 565,260 | 108,445 | 673,705 |
|       | 99.00   | 94.67   | 98.28   |
| 1     | 5,685   | 6,101   | 11,786  |
|       | 1.00    | 5.33    | 1.72    |
| Total | 570,945 | 114,546 | 685,491 |
|       | 100.00  | 100.00  | 100.00  |

. cs died\_0\_90 infected if wave==3 & ttstudyend>=0

|                                     | infected       |           | Total                |
|-------------------------------------|----------------|-----------|----------------------|
|                                     | Exposed        | Unexposed |                      |
| Cases                               | 6101           | 5685      | 11786                |
| Noncases                            | 108445         | 565260    | 673705               |
| Total                               | 114546         | 570945    | 685491               |
| Risk                                | .0532624       | .0099572  | .0171935             |
|                                     | Point estimate |           | [95% conf. interval] |
| Risk difference                     | .0433053       |           | .0419796 .0446309    |
| Risk ratio                          | 5.349152       |           | 5.162236 5.542835    |
| Attr. frac. ex.                     | .8130545       |           | .8062855 .8195869    |
| Attr. frac. pop                     | .4208761       |           |                      |
| chi2(1) = 10588.18 Pr>chi2 = 0.0000 |                |           |                      |

. \* 180-day mortality for cases and comparators who are alive on day 91  
. tab died\_91\_180 infected if alive\_day91\_casecontrol==1 & wave==3 & ttstudyend>=91, co

```
+-----+
| Key          |
|-----|
| frequency    |
| column percentage |
+-----+
```

| died_91_18 | infected |         | Total   |
|------------|----------|---------|---------|
|            | 0        | 1       |         |
| 0          | 530,558  | 107,421 | 637,979 |
|            | 99.13    | 99.06   | 99.12   |
| 1          | 4,664    | 1,020   | 5,684   |
|            | 0.87     | 0.94    | 0.88    |
| Total      | 535,222  | 108,441 | 643,663 |
|            | 100.00   | 100.00  | 100.00  |

```
. cs died_91_180 infected if alive_day91_casecontrol==1 & wave==3 &
ttstudyend>=91
```

|                                 | infected       |           | Total                |
|---------------------------------|----------------|-----------|----------------------|
|                                 | Exposed        | Unexposed |                      |
| Cases                           | 1020           | 4664      | 5684                 |
| Noncases                        | 107421         | 530558    | 637979               |
| Total                           | 108441         | 535222    | 643663               |
| Risk                            | .009406        | .0087141  | .0088307             |
|                                 | Point estimate |           | [95% conf. interval] |
| Risk difference                 | .0006919       |           | .0000657 .001318     |
| Risk ratio                      | 1.079399       |           | 1.009012 1.154696    |
| Attr. frac. ex.                 | .0735587       |           | .0089317 .1339714    |
| Attr. frac. pop                 | .0132002       |           |                      |
| chi2(1) = 4.93 Pr>chi2 = 0.0264 |                |           |                      |

```
. * 365-day mortality for cases and comparators who are alive on day 181
& not censored
```

```
. tab died_181_365 infected if alive_day181_casecontrol==1 & wave==3 &
ttstudyend>=181, co
```

```
+-----+
| Key |
|-----|
| frequency |
| column percentage |
+-----+
```

| died_181_3 | infected |         | Total   |
|------------|----------|---------|---------|
| 65         | 0        | 1       |         |
| 0          | 514,224  | 105,580 | 619,804 |
|            | 97.83    | 98.29   | 97.91   |
| 1          | 11,398   | 1,841   | 13,239  |
|            | 2.17     | 1.71    | 2.09    |
| Total      | 525,622  | 107,421 | 633,043 |
|            | 100.00   | 100.00  | 100.00  |

```
. cs died_181_365 infected if alive_day181_casecontrol==1 & wave==3 &
ttstudyend>=181
```

|       | infected |           | Total |
|-------|----------|-----------|-------|
|       | Exposed  | Unexposed |       |
| Cases | 1841     | 11398     | 13239 |

|                                  |                |          |                      |
|----------------------------------|----------------|----------|----------------------|
| Noncases                         | 105580         | 514224   | 619804               |
| Total                            | 107421         | 525622   | 633043               |
| Risk                             | .0171382       | .0216848 | .0209133             |
|                                  | Point estimate |          | [95% conf. interval] |
| Risk difference                  | -.0045466      |          | -.0054169 - .0036763 |
| Risk ratio                       | .7903318       |          | .7526963 .8298492    |
| Prev. frac. ex.                  | .2096682       |          | .1701508 .2473037    |
| Prev. frac. pop                  | .0355786       |          |                      |
| chi2(1) = 90.05 Pr>chi2 = 0.0000 |                |          |                      |

```
.
. * 730-day mortality for cases and comparators who are alive on day 366
& not censored
. tab died_366_730 infected if alive_day366_casecontrol==1 & wave==3 &
ttstudyend>=366, co
```

```
+-----+
| Key |
|-----|
| frequency |
| column percentage |
+-----+
```

| died_366_7_30 | infected |        | Total   |
|---------------|----------|--------|---------|
|               | 0        | 1      |         |
| 0             | 459,782  | 96,344 | 556,126 |
|               | 98.99    | 99.26  | 99.04   |
| 1             | 4,689    | 720    | 5,409   |
|               | 1.01     | 0.74   | 0.96    |
| Total         | 464,471  | 97,064 | 561,535 |
|               | 100.00   | 100.00 | 100.00  |

```
. cs died_366_730 infected if alive_day366_casecontrol==1 & wave==3 &
ttstudyend>=366
```

|          | infected       |           | Total                |
|----------|----------------|-----------|----------------------|
|          | Exposed        | Unexposed |                      |
| Cases    | 720            | 4689      | 5409                 |
| Noncases | 96344          | 459782    | 556126               |
| Total    | 97064          | 464471    | 561535               |
| Risk     | .0074178       | .0100954  | .0096325             |
|          | Point estimate |           | [95% conf. interval] |

|                 |           |           |          |
|-----------------|-----------|-----------|----------|
| Risk difference | -.0026776 | -.0032892 | -.002066 |
| Risk ratio      | .7347721  | .679539   | .7944946 |
| Prev. frac. ex. | .2652279  | .2055054  | .320461  |
| Prev. frac. pop | .0458459  |           |          |

chi2(1) = 60.34 Pr>chi2 = 0.0000

```

.
.
. *-----
. * Overall for comparators by later infection status
. *-----
.

```

```

. tab isfutureinfectedcontrol case , co

```

```

+-----+
| Key |
|-----|
| frequency |
| column percentage |
+-----+

```

```

indicator: |
  is the |
patienticn |
  an | indicator: is
uninfected | `index_dt` the date
control in | of the first positive
the 25:1 | covid-19 test result
matched | for
cohort wh | 0 1 | Total
-----+-----+-----+
0 | 900,097 208,061 | 1,108,158
| 86.76 100.00 | 88.97
-----+-----+-----+
1 | 137,326 0 | 137,326
| 13.24 0.00 | 11.03
-----+-----+-----+
Total | 1,037,423 208,061 | 1,245,484
| 100.00 100.00 | 100.00

```

```

. tab isfutureinfectedcontrol case if alive_day91, co

```

```

+-----+
| Key |
|-----|
| frequency |
| column percentage |
+-----+

```

```

indicator: |
  is the |
patienticn |

```

```

an | indicator: is
uninfected | `index_dt` the date
control in | of the first positive
the 25:1 | covid-19 test result
matched | for
cohort wh | 0 1 | Total
-----+-----+-----
0 | 889,988 195,646 | 1,085,634
| 86.74 100.00 | 88.86
-----+-----+-----
1 | 136,036 0 | 136,036
| 13.26 0.00 | 11.14
-----+-----+-----
Total | 1,026,024 195,646 | 1,221,670
| 100.00 100.00 | 100.00

```

. tab isfutureinfectedcontrol case if alive\_day181, co

```

+-----+
| Key |
|-----|
| frequency |
| column percentage |
+-----+

```

```

indicator: |
is the |
patienticn |
an | indicator: is
uninfected | `index_dt` the date
control in | of the first positive
the 25:1 | covid-19 test result
matched | for
cohort wh | 0 1 | Total
-----+-----+-----
0 | 881,032 193,602 | 1,074,634
| 86.74 100.00 | 88.86
-----+-----+-----
1 | 134,677 0 | 134,677
| 13.26 0.00 | 11.14
-----+-----+-----
Total | 1,015,709 193,602 | 1,209,311
| 100.00 100.00 | 100.00

```

. tab isfutureinfectedcontrol case if alive\_day366, co

```

+-----+
| Key |
|-----|
| frequency |
| column percentage |
+-----+

```

indicator: |

```

is the |
patienticn |
an | indicator: is
uninfected | `index_dt` the date
control in | of the first positive
the 25:1 | covid-19 test result
matched | for
cohort wh | 0 1 | Total
-----+-----+-----
0 | 823,199 181,657 | 1,004,856
| 86.70 100.00 | 88.84
-----+-----+-----
1 | 126,254 0 | 126,254
| 13.30 0.00 | 11.16
-----+-----+-----
Total | 949,453 181,657 | 1,131,110
| 100.00 100.00 | 100.00

```

```

. * 90-day mortality for comparators by later infection status who are
alive on index date
. tab died_0_90 isfutureinfectedcontrol if infected==0 & ttstudyend>=0,
co

```

```

+-----+
| Key |
|-----|
| frequency |
| column percentage |
+-----+

```

```

indicator: is the
patienticn an
uninfected control in
the 25:1 matched
cohort wh
died_0_90 | 0 1 | Total
-----+-----+-----
0 | 889,988 136,036 | 1,026,024
| 98.88 99.06 | 98.90
-----+-----+-----
1 | 10,109 1,290 | 11,399
| 1.12 0.94 | 1.10
-----+-----+-----
Total | 900,097 137,326 | 1,037,423
| 100.00 100.00 | 100.00

```

```

. cs died_0_90 isfutureinfectedcontrol if infected==0 & ttstudyend>=0

```

```

| indicator: is the |
| patienticn an |
| uninfected control in |
| the 25:1 matched |
| cohort wh |

```



|                                  | Exposed        | Unexposed | Total                |           |
|----------------------------------|----------------|-----------|----------------------|-----------|
| Cases                            | 1290           | 10109     | 11399                |           |
| Noncases                         | 136036         | 889988    | 1026024              |           |
| Total                            | 137326         | 900097    | 1037423              |           |
| Risk                             | .0093937       | .011231   | .0109878             |           |
|                                  | Point estimate |           | [95% conf. interval] |           |
| Risk difference                  | -.0018373      |           | -.002392             | -.0012826 |
| Risk ratio                       | .8364078       |           | .789538              | .8860599  |
| Prev. frac. ex.                  | .1635922       |           | .1139401             | .210462   |
| Prev. frac. pop                  | .0216551       |           |                      |           |
| chi2(1) = 37.01 Pr>chi2 = 0.0000 |                |           |                      |           |

```
.
. * 180-day mortality for comparators by later infection status who are
alive on day 91
. tab died_91_180 isfutureinfectedcontrol if infected==0 &
alive_day91==1 & ttstudyend>=91, co
```

```
+-----+
| Key |
|-----|
| frequency |
| column percentage |
+-----+
```

| died_91_18 | indicator: is the patient in an uninfected control in the 25:1 matched cohort wh |         | Total     |
|------------|----------------------------------------------------------------------------------|---------|-----------|
|            | 0                                                                                | 1       |           |
| 0          | 881,032                                                                          | 134,677 | 1,015,709 |
|            | 98.99                                                                            | 99.00   | 98.99     |
| 1          | 8,956                                                                            | 1,359   | 10,315    |
|            | 1.01                                                                             | 1.00    | 1.01      |
| Total      | 889,988                                                                          | 136,036 | 1,026,024 |
|            | 100.00                                                                           | 100.00  | 100.00    |

```
. cs died_91_180 isfutureinfectedcontrol if infected==0 & alive_day91==1
& ttstudyend>=91
```

```
| indicator: is the |
| patient in an |
| uninfected control in |
| the 25:1 matched |
```

|                 | cohort wh      |           |                       |
|-----------------|----------------|-----------|-----------------------|
|                 | Exposed        | Unexposed | Total                 |
| Cases           | 1359           | 8956      | 10315                 |
| Noncases        | 134677         | 881032    | 1015709               |
| Total           | 136036         | 889988    | 1026024               |
| Risk            | .00999         | .0100631  | .0100534              |
|                 | Point estimate |           | [95% conf. interval]  |
| Risk difference | -.0000731      |           | -.0006408 .0004946    |
| Risk ratio      | .9927403       |           | .9379505 1.050731     |
| Prev. frac. ex. | .0072597       |           | -.0507307 .0620495    |
| Prev. frac. pop | .0009625       |           |                       |
|                 | chi2(1) =      |           | 0.06 Pr>chi2 = 0.8014 |

. \* 365-day mortality for comparators by later infection status who are alive on day 181 & not censored  
. tab died\_181\_365 isfutureinfectedcontrol if infected==0 & alive\_day181==1 & ttstudyend>=181, co

```
+-----+
| Key          |
|-----|
| frequency    |
| column percentage |
+-----+
```

| died_181_365 | indicator: is the patient an uninfected control in the 25:1 matched cohort wh |         | Total     |
|--------------|-------------------------------------------------------------------------------|---------|-----------|
|              | 0                                                                             | 1       |           |
| 0            | 862,422                                                                       | 130,652 | 993,074   |
|              | 97.89                                                                         | 97.01   | 97.77     |
| 1            | 18,610                                                                        | 4,025   | 22,635    |
|              | 2.11                                                                          | 2.99    | 2.23      |
| Total        | 881,032                                                                       | 134,677 | 1,015,709 |
|              | 100.00                                                                        | 100.00  | 100.00    |

. cs died\_181\_365 isfutureinfectedcontrol if infected==0 & alive\_day181==1 & ttstudyend>=181

```
| indicator: is the |
| patient an |
| uninfected control in |
```

|                                   | Exposed        | Unexposed | Total                |
|-----------------------------------|----------------|-----------|----------------------|
| Cases                             | 4025           | 18610     | 22635                |
| Noncases                          | 130652         | 862422    | 993074               |
| Total                             | 134677         | 881032    | 1015709              |
| Risk                              | .0298863       | .021123   | .0222849             |
|                                   | Point estimate |           | [95% conf. interval] |
| Risk difference                   | .0087634       |           | .0078057 .009721     |
| Risk ratio                        | 1.414874       |           | 1.368145 1.463199    |
| Attr. frac. ex.                   | .2932233       |           | .2690833 .316566     |
| Attr. frac. pop                   | .0521415       |           |                      |
| chi2(1) = 411.75 Pr>chi2 = 0.0000 |                |           |                      |

```
. * 730-day mortality for comparators by later infection status who are
alive on day 366 & not censored
. tab died_366_730 isfutureinfectedcontrol if infected==0 &
alive_day366==1 & ttstudyend>=366, co
```

```
+-----+
| Key          |
|-----|
| frequency    |
| column percentage |
+-----+
```

| died_366_730 | 0       | 1       | Total   |
|--------------|---------|---------|---------|
| 0            | 809,909 | 121,905 | 931,814 |
|              | 98.39   | 96.56   | 98.14   |
| 1            | 13,290  | 4,349   | 17,639  |
|              | 1.61    | 3.44    | 1.86    |
| Total        | 823,199 | 126,254 | 949,453 |
|              | 100.00  | 100.00  | 100.00  |

```
. cs died_366_730 isfutureinfectedcontrol if infected==0 &
alive_day366==1 & ttstudyend>=366
```

```
| indicator: is the |
| patientcn an      |
```

|                 | Exposed        | Unexposed | Total                |
|-----------------|----------------|-----------|----------------------|
| Cases           | 4349           | 13290     | 17639                |
| Noncases        | 121905         | 809909    | 931814               |
| Total           | 126254         | 823199    | 949453               |
| Risk            | .0344464       | .0161443  | .0185781             |
|                 | Point estimate |           | [95% conf. interval] |
| Risk difference | .0183021       |           | .0172599 .0193443    |
| Risk ratio      | 2.133655       |           | 2.062901 2.206835    |
| Attr. frac. ex. | .5313206       |           | .5152457 .5468624    |
| Attr. frac. pop | .1310002       |           |                      |

chi2(1) = 2011.05 Pr>chi2 = 0.0000

```

.
.
. *-----
. * Appendix Figure 2 - Kaplan Meier Curves
. *-----
.
. * 0-90 Days
. preserve

.       stset tte_0_90 , failure(died_0_90==1)

```

Survival-time data settings

```

Failure event: died_0_90==1
Observed time interval: (0, tte_0_90]
Exit on or before: failure

```

```

-----
--
1,245,484 total observations
341 observations end on or before enter()
-----

```

```

-----
--
1,245,143 observations remaining, representing
23,473 failures in single-record/single-failure data
110735739 total analysis time at risk and under observation
At risk from t =
0
Earliest observed entry t =
0
Last observed exit t =
90

```

```
. sts test infected, logrank
```

```
Failure _d: died_0_90==1  
Analysis time _t: tte_0_90
```

```
Equality of survivor functions  
Log-rank test
```

|             | Observed<br>events | Expected<br>events |
|-------------|--------------------|--------------------|
| infected    |                    |                    |
| -----+----- |                    |                    |
| 0           | 11258              | 19660.53           |
| 1           | 12215              | 3812.47            |
| -----+----- |                    |                    |
| Total       | 23473              | 23473.00           |

```
chi2(1) = 22116.70  
Pr>chi2 = 0.0000
```

```
. sts graph, by(infected) name(survival090itt, replace) ///  
> legend(pos(5) ring(0) rows(2) region(lcolor(none)) ///  
> size(small) label(1 "Comparators")  
label(2 "COVID-19 Cases")) ///  
> graphregion(color(white)) bgcolor(white) title("Days  
0-90", color(black) size(medium)) ///  
> xtitle("") ///  
> plotlopts(lpattern(solid) lcolor("0 114 178")) ///  
> plot2opts(lpattern(dash) lcolor("230 159 0")) ///  
> tlabel(, labsize(small)) ylabel(, labsize(small))
```

```
Failure _d: died_0_90==1  
Analysis time _t: tte_0_90
```

```
. *graph save "survival090itt" "Figures\survival090itt.gph",  
replace  
. stset , clear
```

```
. restore
```

```
. * 91-180 Days  
. preserve
```

```
. keep if alive_day91_casecontrol==1  
(74,343 observations deleted)
```

```
. stset tte_91_180 , failure(died_91_180==1)
```

```
Survival-time data settings
```

```
Failure event: died_91_180==1  
Observed time interval: (0, tte_91_180]  
Exit on or before: failure
```

```
-----
--
1,171,141 total observations
10,502 event time missing (tte_91_180>=.) PROBABLE
ERROR
-----
```

```
--
1,160,639 observations remaining, representing
11,558 failures in single-record/single-failure data
208398252 total analysis time at risk and under observation
At risk from t =
0
Earliest observed entry t =
0
Last observed exit t =
180
```

```
. sts test infected, logrank
```

```
Failure _d: died_91_180==1
Analysis time _t: tte_91_180
```

```
Equality of survivor functions
Log-rank test
```

|              | Observed<br>events | Expected<br>events |
|--------------|--------------------|--------------------|
| infected   0 | 9514               | 9610.64            |
| infected   1 | 2044               | 1947.36            |
| Total        | 11558              | 11558.00           |

```
chi2(1) = 5.77
Pr>chi2 = 0.0163
```

```
. sts graph, by(infected) name(survival91180itt, replace) ///
> legend(pos(5) ring(0) rows(2) region(lcolor(none)) ///
> size(small) label(1 "Comparators"
label(2 "COVID-19 Cases")) ///
> graphregion(color(white)) bgcolor(white) title("Days
91-180", color(black) size(medium)) ///
> xtitle("") ///
> plotlopts(lpattern(solid) lcolor("0 114 178")) ///
> plot2opts(lpattern(dash) lcolor("230 159 0")) ///
> ylabel(0.9 (0.02) 1.0, labsize(small)) ///
> tmin(91) tlabel(90 (20) 190, labsize(small))
```

```
Failure _d: died_91_180==1
Analysis time _t: tte_91_180
```

```
. *graph save "survival91180itt" "Figures\survival91180itt.gph",
replace
. stset , clear
```

```

. restore

.
. * 181-365 Days
. preserve

.       keep if alive_day181_casecontrol==1
(86,579 observations deleted)

.       stset tte_181_365 , failure(died_181_365==1)

```

Survival-time data settings

```

          Failure event: died_181_365==1
Observed time interval: (0, tte_181_365]
Exit on or before: failure

```

```

-----
--
 1,158,905  total observations
  19,710   event time missing (tte_181_365>=.)          PROBABLE
ERROR
-----

```

```

--
 1,139,195  observations remaining, representing
  24,026   failures in single-record/single-failure data
412887955  total analysis time at risk and under observation
                                                At risk from t =
0
                                                Earliest observed entry t =
0
                                                Last observed exit t =
365

```

```

.       sts test infected, logrank

```

```

          Failure _d: died_181_365==1
Analysis time _t: tte_181_365

```

Equality of survivor functions  
Log-rank test

|            | Observed events | Expected events |
|------------|-----------------|-----------------|
| infected 0 | 20594           | 19936.63        |
| infected 1 | 3432            | 4089.37         |
| Total      | 24026           | 24026.00        |

```

          chi2(1) = 127.36
          Pr>chi2 = 0.0000

```

```

.      sts graph, by(infected) name(survival181365itt, replace) ///
>      legend(pos(5) ring(0) rows(2) region(lcolor(none)) ///
>      size(small) label(1 "Comparators")
label(2 "COVID-19 Cases"))    ///
>      graphregion(color(white)) bgcolor(white) title("Days
181-365", color(black) size(medium)) ///
>      xtitle("") ///
>      plotlopts(lpattern(solid) lcolor("0 114 178")) ///
>      plot2opts(lpattern(dash) lcolor("230 159 0"))    ///
>      ylabel(0.9 (0.02) 1.0, labsize(small)) ///
>      tmin(181) tlabel(180 (40) 380, labsize(small))

```

```

      Failure _d: died_181_365==1
      Analysis time _t: tte_181_365

```

```

.      *graph save "survival181365itt"
"Figures\survival181365itt.gph", replace
.      stset , clear

```

```

. restore

```

```

.
. * 366-730 Days
. preserve

```

```

.      keep if alive_day366_casecontrol==1
(157,981 observations deleted)

```

```

.      stset tte_366_730 , failure(died_366_730==1)

```

```

Survival-time data settings

```

```

      Failure event: died_366_730==1
      Observed time interval: (0, tte_366_730]
      Exit on or before: failure

```

```

-----
--
 1,087,503 total observations
   38,020 event time missing (tte_366_730>=.)          PROBABLE
ERROR
-----

```

```

--
 1,049,483 observations remaining, representing
   17,998 failures in single-record/single-failure data
528362986 total analysis time at risk and under observation
                                     At risk from t =
0
                                     Earliest observed entry t =
0
                                     Last observed exit t =
730

```

```

.      sts test infected, logrank

```



```
Failure _d: died_366_730==1
Analysis time _t: tte_366_730
```

Equality of survivor functions  
Log-rank test

|             | Observed<br>events | Expected<br>events |
|-------------|--------------------|--------------------|
| infected    |                    |                    |
| -----+----- |                    |                    |
| 0           | 15481              | 14871.89           |
| 1           | 2517               | 3126.11            |
| -----+----- |                    |                    |
| Total       | 17998              | 17998.00           |

```
chi2(1) = 143.65
Pr>chi2 = 0.0000
```

```
. sts graph, by(infected) name(survival366730itt, replace) ///
> legend(pos(5) ring(0) rows(2) region(lcolor(none)) ///
> size(small) label(1 "Comparators")
label(2 "COVID-19 Cases")) ///
> graphregion(color(white)) bgcolor(white) title("Days
366-730", color(black) size(medium)) ///
> xtitle("") ///
> plotlopts(lpattern(solid) lcolor("0 114 178")) ///
> plot2opts(lpattern(dash) lcolor("230 159 0")) ///
> ylabel(0.9 (0.02) 1.0, labsize(small)) ///
> tmin(366) tlabel(365 450 550 650 730, labsize(small))
```

```
Failure _d: died_366_730==1
Analysis time _t: tte_366_730
```

```
. *graph save "survival366730itt"
"Figures\survival366730itt.gph", replace
. stset , clear

. restore

.
. * 0-365 Days
. preserve

. stset tte_0_365 , failure(died_0_365)
```

Survival-time data settings

```
Failure event: died_0_365!=0 & died_0_365<.
Observed time interval: (0, tte_0_365]
Exit on or before: failure
```

```
-----
--
1,245,484 total observations
```

```

          341  observations end on or before enter()
-----
--
1,245,143  observations remaining, representing
   61,899  failures in single-record/single-failure data
440719447  total analysis time at risk and under observation
                                                At risk from t =
0
                                                Earliest observed entry t =
0
                                                Last observed exit t =
365

.          *sts test infected, logrank
.          sts graph, by(infected) name(survival0365, replace)

          Failure _d: died_0_365
Analysis time _t: tte_0_365

.          stset , clear

. restore

.
. * 0-730 Days
. preserve

.          stset tte_0_730 , failure(died_0_730)

Survival-time data settings

          Failure event: died_0_730!=0 & died_0_730<.
Observed time interval: (0, tte_0_730]
Exit on or before: failure
-----
--
   1,245,484  total observations
         341  observations end on or before enter()
-----
--
1,245,143  observations remaining, representing
   82,056  failures in single-record/single-failure data
598623178  total analysis time at risk and under observation
                                                At risk from t =
0
                                                Earliest observed entry t =
0
                                                Last observed exit t =
730

.          stdescribe if infected==1

          Failure _d: died_0_730

```

Analysis time \_t: tte\_0\_730

| Category           | Total    | Mean     | Min | Median |
|--------------------|----------|----------|-----|--------|
| Number of subjects | 207861   |          |     |        |
| Number of records  | 207861   | 1        | 1   | 1      |
| Entry time (first) |          | 0        | 0   | 0      |
| Exit time (final)  |          | 461.8972 | 1   | 471    |
| Subjects with gap  | 0        |          |     |        |
| Time on gap        | 0        |          |     |        |
| Time at risk       | 96010404 | 461.8972 | 1   | 471    |
| Failures           | 20209    | .0972236 | 0   | 0      |

. stdescribe if infected==0

Failure \_d: died\_0\_730  
Analysis time \_t: tte\_0\_730

| Category           | Total     | Mean     | Min | Median |
|--------------------|-----------|----------|-----|--------|
| Number of subjects | 1037282   |          |     |        |
| Number of records  | 1037282   | 1        | 1   | 1      |
| Entry time (first) |           | 0        | 0   | 0      |
| Exit time (final)  |           | 484.5479 | 1   | 476    |
| Subjects with gap  | 0         |          |     |        |
| Time on gap        | 0         |          |     |        |
| Time at risk       | 5.026e+08 | 484.5479 | 1   | 476    |
| Failures           | 61847     | .0596241 | 0   | 0      |

```

-----
-----
.      *sts test infected, logrank
.      sts graph, by(infected) name(survival0730itt, replace) ///
>          legend(pos(5) ring(0) rows(2) region(lcolor(none)) ///
>          size(small) label(1 "Comparators"
label(2 "COVID-19 Cases"))    ///
>          graphregion(color(white)) bgcolor(white) title("Days
0-730", color(black) size(medium)) ///
>          xtitle("") ///
>          plotlopts(lpattern(solid) lcolor("0 114 178")) ///
>          plot2opts(lpattern(dash) lcolor("230 159 0"))    ///
>          tlabel(, labsize(small)) ylabel(, labsize(small))

```

Failure \_d: died\_0\_730  
Analysis time \_t: tte\_0\_730

```

.      *graph save "survival0730itt" "Figures\survival0730itt.gph",
replace
.      stset , clear

. restore

```

```

.
. *-----
. * Table 1: SMDs
. *-----
.
. * Baseline covariate balance for 5-to-1 match cohort
.
. tab infected

```

| infected | Freq.     | Percent | Cum.   |
|----------|-----------|---------|--------|
| 0        | 1,037,423 | 83.29   | 83.29  |
| 1        | 208,061   | 16.71   | 100.00 |
| Total    | 1,245,484 | 100.00  |        |

```

.
. stddiff ageatindexdate, by(infected)

```

```

-----
-----

```

| Diff           | infected=0 |           | infected=1 |           | Std |
|----------------|------------|-----------|------------|-----------|-----|
|                | Mean or N  | SD or (%) | Mean or N  | SD or (%) |     |
| ageatindexdate | 60.47      | 16.464    | 60.51      | 16.19     | -   |
| 0.00286        |            |           |            |           |     |

```

-----
-----

```

```
. stddiff bmi, by(infected)
```

```
-----  
-----  
          |          infected=0          |          infected=1          |  
          | Mean or N      SD or (%) | Mean or N      SD or (%) | Std  
Diff  
-----+-----+-----+-----  
-----  
      bmi |          31.28          6.6078 |          31.34          6.3499 | -  
0.01003  
-----  
-----
```

```
. stddiff i.sex3cat, by(infected)
```

```
-----  
-----  
          |          infected=0          |          infected=1          |  
          | Mean or N      SD or (%) | Mean or N      SD or (%) | Std  
Diff  
-----+-----+-----+-----  
-----  
      sex3cat |  
      Female |          109085          (10.5) |          21936          (10.5) |  
0.00411  
      Male |          914361          (88.1) |          183226          (88.1) |  
      Unknown |          13977          ( 1.3) |          2899          ( 1.4) |  
-----  
-----
```

```
. stddiff i.race7cat, by(infected)
```

```
-----  
-----  
          |          infected=0          |          infected=1          |  
          | Mean or N      SD or (%) | Mean or N      SD or (%) | Std  
Diff  
-----+-----+-----+-----  
-----  
      race7cat |  
AmericanIn~e |          9578          ( 0.9) |          1961          ( 0.9) |  
0.00338  
      Asian |          10536          ( 1.0) |          2081          ( 1.0) |  
Black/Afri~r |          237896          (22.9) |          47645          (22.9) |  
NativeHawa~d |          9704          ( 0.9) |          1944          ( 0.9) |  
      White |          696309          (67.1) |          139604          (67.1) |  
MultipleRace |          9869          ( 1.0) |          1975          ( 0.9) |  
      Missing |          63531          ( 6.1) |          12851          ( 6.2) |  
-----  
-----
```

```
. stddiff i.ethnicity3cat, by(infected)
```

```
-----
```

|              | infected=0 |           | infected=1 |           |     |
|--------------|------------|-----------|------------|-----------|-----|
| Diff         | Mean or N  | SD or (%) | Mean or N  | SD or (%) | Std |
| ethnicity3~t |            |           |            |           |     |
| Hispanic     | 99093      | ( 9.6)    | 20280      | ( 9.7)    |     |
| 0.00668      |            |           |            |           |     |
| NotHispanic  | 903000     | (87.0)    | 180675     | (86.8)    |     |
| Missing      | 35330      | ( 3.4)    | 7106       | ( 3.4)    |     |

```
-----
```

```
. stddiff i.rurality2cat, by(infected)
```

```
-----
```

|              | infected=0 |           | infected=1 |           |     |
|--------------|------------|-----------|------------|-----------|-----|
| Diff         | Mean or N  | SD or (%) | Mean or N  | SD or (%) | Std |
| rurality2cat |            |           |            |           |     |
| NotUrban     | 294989     | (28.4)    | 59064      | (28.4)    |     |
| 0.00104      |            |           |            |           |     |
| Urban        | 742434     | (71.6)    | 148997     | (71.6)    |     |

```
-----
```

```
. stddiff i.smoking4cat, by(infected)
```

```
-----
```

|             | infected=0 |           | infected=1 |           |     |
|-------------|------------|-----------|------------|-----------|-----|
| Diff        | Mean or N  | SD or (%) | Mean or N  | SD or (%) | Std |
| smoking4cat |            |           |            |           |     |
| Current     | 131249     | (12.7)    | 26144      | (12.6)    |     |
| 0.01171     |            |           |            |           |     |
| Former      | 439908     | (42.4)    | 88025      | (42.3)    |     |
| Never       | 408648     | (39.4)    | 81777      | (39.3)    |     |
| Missing     | 57618      | ( 5.6)    | 12115      | ( 5.8)    |     |

```
-----
```

```
. stddiff gagne, by(infected)
```

```
-----
```

|         | infected=0 |           | infected=1 |           |     |
|---------|------------|-----------|------------|-----------|-----|
| Diff    | Mean or N  | SD or (%) | Mean or N  | SD or (%) | Std |
| gagne   | 1.403      | 2.2383    | 1.441      | 2.3416    | -   |
| 0.01655 |            |           |            |           |     |

. stddiff numipadmits, by(infected)

|             | infected=0 |           | infected=1 |           |     |
|-------------|------------|-----------|------------|-----------|-----|
| Diff        | Mean or N  | SD or (%) | Mean or N  | SD or (%) | Std |
| numipadmits | .3567      | 1.2623    | .3585      | 1.2094    | -   |
| 0.00152     |            |           |            |           |     |

. stddiff util\_numpcstops, by(infected)

|              | infected=0 |           | infected=1 |           |     |
|--------------|------------|-----------|------------|-----------|-----|
| Diff         | Mean or N  | SD or (%) | Mean or N  | SD or (%) | Std |
| util_numpc~s | 8.278      | 10.421    | 8.551      | 9.6582    | -   |
| 0.02719      |            |           |            |           |     |

. stddiff util\_numscstops, by(infected)

|              | infected=0 |           | infected=1 |           |     |
|--------------|------------|-----------|------------|-----------|-----|
| Diff         | Mean or N  | SD or (%) | Mean or N  | SD or (%) | Std |
| util_numsc~s | 13.44      | 15.34     | 13.88      | 14.141    | -   |
| 0.02959      |            |           |            |           |     |

. stddiff util\_nummhstops, by(infected)

```
-----
```

|             | infected=0 |           | infected=1 |           |     |
|-------------|------------|-----------|------------|-----------|-----|
| Diff        | Mean or N  | SD or (%) | Mean or N  | SD or (%) | Std |
| util_numh~s | 7.78       | 21.931    | 7.868      | 22.644    | -   |

```
-----
```

```
. stddiff i.immuno, by(infected)
```

```
-----
```

|        | infected=0 |           | infected=1 |           |     |
|--------|------------|-----------|------------|-----------|-----|
| Diff   | Mean or N  | SD or (%) | Mean or N  | SD or (%) | Std |
| immuno |            |           |            |           |     |
| 0      | 936167     | (90.2)    | 187748     | (90.2)    |     |
| 1      | 101256     | ( 9.8)    | 20313      | ( 9.8)    |     |

```
-----
```

```
. stddiff i.clcatindexdate, by(infected)
```

```
-----
```

|              | infected=0 |           | infected=1 |           |     |
|--------------|------------|-----------|------------|-----------|-----|
| Diff         | Mean or N  | SD or (%) | Mean or N  | SD or (%) | Std |
| clcatindex~e |            |           |            |           |     |
| 0            | 1027879    | (99.1)    | 205899     | (99.0)    |     |
| 1            | 9544       | ( 0.9)    | 2162       | ( 1.0)    |     |

```
-----
```

```
. stddiff i.nosos11cat, by(infected)
```

```
-----
```

|            | infected=0 |           | infected=1 |           |     |
|------------|------------|-----------|------------|-----------|-----|
| Diff       | Mean or N  | SD or (%) | Mean or N  | SD or (%) | Std |
| nosos11cat |            |           |            |           |     |

```
-----
```



|         |    |        |        |       |        |
|---------|----|--------|--------|-------|--------|
| 0.03131 | 1  | 26035  | ( 2.5) | 5694  | ( 2.7) |
|         | 2  | 45530  | ( 4.4) | 9582  | ( 4.6) |
|         | 3  | 60994  | ( 5.9) | 12431 | ( 6.0) |
|         | 4  | 75933  | ( 7.3) | 15159 | ( 7.3) |
|         | 5  | 90104  | ( 8.7) | 17707 | ( 8.5) |
|         | 6  | 105586 | (10.2) | 20526 | ( 9.9) |
|         | 7  | 119913 | (11.6) | 23431 | (11.3) |
|         | 8  | 136532 | (13.2) | 26893 | (12.9) |
|         | 9  | 157063 | (15.1) | 31294 | (15.0) |
|         | 10 | 194278 | (18.7) | 40555 | (19.5) |
|         | 99 | 25455  | ( 2.5) | 4789  | ( 2.3) |

. stddiff i.canscore7cat, by(infected)

| Diff         | infected=0 |               | infected=1 |           | Std |
|--------------|------------|---------------|------------|-----------|-----|
|              | Mean or N  | SD or (%)     | Mean or N  | SD or (%) |     |
| canscore7cat |            |               |            |           |     |
| 0.02458      | 1          | 170471 (16.4) | 34417      | (16.5)    |     |
|              | 2          | 160008 (15.4) | 31900      | (15.3)    |     |
|              | 3          | 194475 (18.7) | 38219      | (18.4)    |     |
|              | 4          | 235676 (22.7) | 46759      | (22.5)    |     |
|              | 5          | 153135 (14.8) | 30638      | (14.7)    |     |
|              | 6          | 102842 ( 9.9) | 22072      | (10.6)    |     |
|              | 99         | 20816 ( 2.0)  | 4056       | ( 1.9)    |     |

. stddiff neareststa3ndistance, by(infected)

| Diff         | infected=0 |           | infected=1 |           | Std |
|--------------|------------|-----------|------------|-----------|-----|
|              | Mean or N  | SD or (%) | Mean or N  | SD or (%) |     |
| nearestst~ce | 35.75      | 35.103    | 35.59      | 36.521    |     |
| 0.00443      |            |           |            |           |     |

.  
.  
. \*\*\*\*\*  
. \* ITT \*

```
. *****  
.   
. use Data\mortality_varforcox_20230516, clear  
(Created in file  
'P:\ORD_Ioannou_202104007D\MethodsGroup\Programs\CORC_DataExplor)
```

```
.   
. *-----  
. * Table 2: ITT Unadjusted  
. *-----  
.   
. * Overall  
. preserve  
  
.          sort uniq_patid  
  
.          stset tte_0_730, failure(died_0_730) id(uniq_patid)
```

Survival-time data settings

```
          ID variable: uniq_patid  
          Failure event: died_0_730!=0 & died_0_730<.  
Observed time interval: (tte_0_730[_n-1], tte_0_730]  
          Exit on or before: failure
```

```
-----  
--  
 1,245,484 total observations  
    341 observations end on or before enter()  
-----
```

```
--  
 1,245,143 observations remaining, representing  
 1,245,143 subjects  
    82,056 failures in single-failure-per-subject data  
 598623178 total analysis time at risk and under observation  
                                     At risk from t =  
0  
                                     Earliest observed entry t =  
0  
                                     Last observed exit t =  
730
```

```
.          stcox infected, efron vce(cluster patienticn)  
strata(matchgroupnumber)
```

```
          Failure _d: died_0_730  
          Analysis time _t: tte_0_730  
          ID variable: uniq_patid
```

```
Iteration 0:    log pseudolikelihood = -143313.92  
Iteration 1:    log pseudolikelihood = -141294.91  
Iteration 2:    log pseudolikelihood = -141214.1  
Iteration 3:    log pseudolikelihood = -141214.06  
Refining estimates:
```

Iteration 0: log pseudolikelihood = -141214.06

Stratified Cox regression with Efron method for ties  
Strata variable: matchgroupnumber

No. of subjects = 1,245,143  
1,245,143

Number of obs =

No. of failures = 82,056

Time at risk = 598623178

Wald chi2(1) =

5361.40

Log pseudolikelihood = -141214.06

Prob > chi2 =

0.0000

(Std. err. adjusted for 1,091,939 clusters in  
patienticn)

```
-----  
-----  
          |  
          | Robust  
          | Haz. ratio  std. err.      z      P>|z|      [95% conf.  
interval] +-----  
-----  
infected | 1.748196   .0133364   73.22   0.000   1.722252  
1.774532  
-----  
-----
```

. restore

.  
. \* By Period

.  
. \* stset data  
. sort uniq\_patid

. recode tte\_0\_730 (0=0.5)  
(341 changes made to tte\_0\_730)

. stset tte\_0\_730, failure(died\_0\_730) id(uniq\_patid)

Survival-time data settings

ID variable: uniq\_patid  
Failure event: died\_0\_730!=0 & died\_0\_730<.  
Observed time interval: (tte\_0\_730[\_n-1], tte\_0\_730]  
Exit on or before: failure

```
-----  
--  
1,245,484 total observations  
0 exclusions  
-----  
--
```

```

1,245,484 observations remaining, representing
1,245,484 subjects
  82,397 failures in single-failure-per-subject data
598623349 total analysis time at risk and under observation
                                         At risk from t =

```

```

0
                                         Earliest observed entry t =
0
                                         Last observed exit t =

```

```
730
```

```

. stsplitt period, at(0 90 180 365 730)
(3,562,091 observations (episodes) created)

```

```

. stdescribe if infected==1

```

```

      Failure _d: died_0_730
Analysis time _t: tte_0_730
      ID variable: uniq_patid

```

| Category           | Total    | Mean     | Min | Median |
|--------------------|----------|----------|-----|--------|
| Number of subjects | 208061   |          |     |        |
| Number of records  | 778966   | 3.743931 | 1   | 4      |
| Entry time (first) |          | 0        | 0   | 0      |
| Exit time (final)  |          | 461.4536 | .5  | 471    |
| Subjects with gap  | 0        |          |     |        |
| Time on gap        | 0        | .        | .   | .      |
| Time at risk       | 96010504 | 461.4536 | .5  | 471    |
| Failures           | 20409    | .0980914 | 0   | 0      |

```

. stdescribe if infected==0

```

```

      Failure _d: died_0_730
Analysis time _t: tte_0_730
      ID variable: uniq_patid

```

```

|----- Per subject -----

```

```
-----|
Category                                Total          Mean          Min          Median
Max
-----|
-----|
Number of subjects                      1037423
Number of records                      4028609      3.883285      1           4
4
Entry time (first)                      0           0           0
0
Exit time (final)                      484.4821     .5           476
730
Subjects with gap                       0
Time on gap                             0           .           .
.
Time at risk                          5.026e+08    484.4821     .5           476
730
Failures                               61988      .0597519     0           0
1
-----|
-----|
```

```
.
. * create new interaction variables after splitting data
. gen timeinfected_0_90 = infected * (tte_0_730<=90)
. gen timeinfected_91_180 = infected * (tte_0_730>90 & tte_0_730<=180)
. gen timeinfected_181_365 = infected * (tte_0_730>180 & tte_0_730<=365)
. gen timeinfected_366_730 = infected * (tte_0_730>365 & tte_0_730<=730)
```

```
.
. * Cox Model
. stcox timeinfected_0_90 timeinfected_91_180 timeinfected_181_365
///
> timeinfected_366_730
///
> , efron vce(cluster patienticn)
strata(matchgroupnumber)
```

```
Failure _d: died_0_730
Analysis time _t: tte_0_730
ID variable: uniq_patid
```

```
Iteration 0: log pseudolikelihood = -143924.5
Iteration 1: log pseudolikelihood = -137775.88
Iteration 2: log pseudolikelihood = -135674.34
Iteration 3: log pseudolikelihood = -135605.93
Iteration 4: log pseudolikelihood = -135605.93
Refining estimates:
```

Iteration 0: log pseudolikelihood = -135605.93

Stratified Cox regression with Efron method for ties  
Strata variable: matchgroupnumber

No. of subjects = 1,245,484  
4,807,575

Number of obs =

No. of failures = 82,397  
Time at risk = 598623348.5

Wald chi2(4) =

23276.74

Log pseudolikelihood = -135605.93  
0.0000

Prob > chi2 =

(Std. err. adjusted for 1,092,248 clusters  
in patienticn)

|                      | _t       | Haz. ratio | Robust<br>std. err. | z      | P> z  | [95%<br>conf. interval] |
|----------------------|----------|------------|---------------------|--------|-------|-------------------------|
| timeinfected_0_90    | 5.623973 | 5.752757   | .0664537            | 151.47 | 0.000 | 5.884489                |
| timeinfected_91_180  | 1.009212 | 1.054258   | .0234888            | 2.37   | 0.018 | 1.101315                |
| timeinfected_181_365 | .7786145 | .8058384   | .0141301            | -12.31 | 0.000 | .8340142                |
| timeinfected_366_730 | .7317639 | .7610328   | .0152282            | -13.65 | 0.000 | .7914724                |

```
.
. *-----
. * Subgroup Analyses - Hospitalization, Adj.
. *-----
.
. * Subgroup analysis for hospitalized/not hospitalized & adjust for
. * imbalanced hospitalization covariates (SMDs>0.1 for hospitalization
subgroups)
.
.
. * Hospitalized Patients
. local imbalanced ageatindexdate bmi i.ethnicity3cat i.smoking4cat ///
>
>                               gagne numipadmits util_numpcstops
util_numscstops ///
>
>                               i.nosos11cat i.canscore7cat
neareststa3ndistance
.
. stcox  timeinfected_0_90 timeinfected_91_180 timeinfected_181_365
///
```

```

> timeinfected_366_730 `imbalanced' ///
> if index_hospitalization==1 ///
> , efron vce(cluster patienticn)
strata(matchgroupnumber)

```

```

Failure _d: died_0_730
Analysis time _t: tte_0_730
ID variable: uniq_patid

```

```

Iteration 0: log pseudolikelihood = -1440.6393
Iteration 1: log pseudolikelihood = -1172.9772
Iteration 2: log pseudolikelihood = -1161.3109
Iteration 3: log pseudolikelihood = -1161.1456
Iteration 4: log pseudolikelihood = -1161.1456
Refining estimates:
Iteration 0: log pseudolikelihood = -1161.1456

```

```

Stratified Cox regression with Efron method for ties
Strata variable: matchgroupnumber

```

```

No. of subjects = 59,528 Number of obs =
196,626
No. of failures = 17,336
Time at risk = 23,463,828
Wald chi2(32) =
592.53
Log pseudolikelihood = -1161.1456 Prob > chi2 =
0.0000

```

(Std. err. adjusted for 58,791 clusters

in patienticn)

|                      | _t       | Haz. ratio | Robust<br>std. err. | z     | P> z  | [95%<br>conf. interval] |
|----------------------|----------|------------|---------------------|-------|-------|-------------------------|
| timeinfected_0_90    | 1.575675 | 1.766286   | .1029108            | 9.76  | 0.000 | 1.979956                |
| timeinfected_91_180  | .3351138 | .4206626   | .048798             | -7.46 | 0.000 | .5280506                |
| timeinfected_181_365 | .4935181 | .6015507   | .060755             | -5.03 | 0.000 | .7332319                |
| timeinfected_366_730 | .3862852 | .4963705   | .0635028            | -5.47 | 0.000 | .6378283                |
| ageatindexdate       | 1.034886 | 1.041538   | .003405             | 12.45 | 0.000 | 1.048233                |
| bmi                  | .9686428 | .9774227   | .0044998            | -4.96 | 0.000 | .9862821                |
| ethnicity3cat        |          |            |                     |       |       |                         |
| NotHispanic          | .6791707 | .8922326   | .1242112            | -0.82 | 0.413 | 1.172134                |

|          |                             |  |          |          |       |       |
|----------|-----------------------------|--|----------|----------|-------|-------|
| .4813586 | Missing<br>1.226838         |  | .768472  | .183414  | -1.10 | 0.270 |
|          |                             |  |          |          |       |       |
|          | smoking4cat                 |  |          |          |       |       |
| .8863732 | Former<br>1.338621          |  | 1.089274 | .1145585 | 0.81  | 0.416 |
| .9820691 | Never<br>1.521953           |  | 1.222564 | .1366328 | 1.80  | 0.072 |
| 1.08085  | Missing<br>1.991448         |  | 1.467125 | .2287238 | 2.46  | 0.014 |
|          |                             |  |          |          |       |       |
| 1.079294 | gagne<br>1.133232           |  | 1.105934 | .0137585 | 8.09  | 0.000 |
| .9650312 | numipadmits<br>1.031607     |  | .9977639 | .0169808 | -0.13 | 0.895 |
| .9930396 | util_numpcstops<br>1.002733 |  | .9978743 | .0024727 | -0.86 | 0.390 |
| .9921559 | util_numscstops<br>1.000096 |  | .996118  | .0020255 | -1.91 | 0.056 |
|          |                             |  |          |          |       |       |
|          | nosos11cat                  |  |          |          |       |       |
| .580334  | 2<br>6.158263               |  | 1.890463 | 1.139095 | 1.06  | 0.291 |
| .4081253 | 3<br>3.742187               |  | 1.235832 | .6985895 | 0.37  | 0.708 |
| .2813238 | 4<br>2.818151               |  | .8904004 | .523422  | -0.20 | 0.843 |
| .512398  | 5<br>5.146513               |  | 1.623904 | .9557067 | 0.82  | 0.410 |
| .2641857 | 6<br>2.583225               |  | .8261061 | .480529  | -0.33 | 0.743 |
| .2547058 | 7<br>2.462293               |  | .7919346 | .4583485 | -0.40 | 0.687 |
| .3006503 | 8<br>2.855352               |  | .9265324 | .5320575 | -0.13 | 0.894 |
| .2523969 | 9<br>2.40881                |  | .7797282 | .4487269 | -0.43 | 0.665 |
| .2495044 | 10<br>2.395101              |  | .7730383 | .4460245 | -0.45 | 0.655 |
| .3838485 | 99<br>5.559312              |  | 1.460799 | .9961124 | 0.56  | 0.578 |
|          |                             |  |          |          |       |       |
|          | canscore7cat                |  |          |          |       |       |
| .914334  | 2<br>3.522184               |  | 1.794562 | .6174142 | 1.70  | 0.089 |
| 1.441732 | 3<br>4.942219               |  | 2.669336 | .8389288 | 3.12  | 0.002 |
| 1.303219 | 4<br>4.586341               |  | 2.444791 | .7847459 | 2.79  | 0.005 |
| 1.480841 | 5<br>5.50467                |  | 2.855091 | .9563174 | 3.13  | 0.002 |
| 1.741122 | 6<br>6.824244               |  | 3.447004 | 1.201155 | 3.55  | 0.000 |
|          | 99                          |  | 1.896987 | .9236675 | 1.31  | 0.189 |



.7304718 4.926351

neareststa3ndistance | 1.006099 .0010286 5.95 0.000  
1.004085 1.008117

```
.
. * Non-Hospitalized
. stcox timeinfected_0_90 timeinfected_91_180 timeinfected_181_365
///  
> timeinfected_366_730 `imbalanced' ///  
> if index_hospitalization==0 ///  
> , efron vce(cluster patienticn)
strata(matchgroupnumber)
```

Failure \_d: died\_0\_730  
Analysis time \_t: tte\_0\_730  
ID variable: uniq\_patid

Iteration 0: log pseudolikelihood = -110382.69  
Iteration 1: log pseudolikelihood = -78084.666  
Iteration 2: log pseudolikelihood = -75957.277  
Iteration 3: log pseudolikelihood = -75826.973  
Iteration 4: log pseudolikelihood = -75825.526  
Iteration 5: log pseudolikelihood = -75825.526  
Refining estimates:  
Iteration 0: log pseudolikelihood = -75825.526

Stratified Cox regression with Efron method for ties  
Strata variable: matchgroupnumber

No. of subjects = 1,185,956 Number of obs =  
4,610,949  
No. of failures = 65,061  
Time at risk = 575159521  
  
Wald chi2(32) =  
41033.75  
Log pseudolikelihood = -75825.526 Prob > chi2 =  
0.0000

(Std. err. adjusted for 1,040,959 clusters  
in patienticn)

```
-----+-----
                |          Robust
                |          std. err.      z    P>|z|    [95%
conf. interval]
-----+-----
timeinfected_0_90 | 2.685776   .0610014   43.50   0.000
2.568838   2.808038
timeinfected_91_180 | .7958783   .0281021   -6.47   0.000
.7426619   .852908
```

|                      |  |          |          |        |       |
|----------------------|--|----------|----------|--------|-------|
| timeinfected_181_365 |  | .6655412 | .0183059 | -14.80 | 0.000 |
| .6306121             |  | .7024049 |          |        |       |
| timeinfected_366_730 |  | .6678794 | .0214694 | -12.56 | 0.000 |
| .6270984             |  | .7113124 |          |        |       |
| ageatindexdate       |  | 1.06346  | .0008091 | 80.87  | 0.000 |
| 1.061876             |  | 1.065047 |          |        |       |
| bmi                  |  | .983417  | .0011663 | -14.10 | 0.000 |
| .9811337             |  | .9857057 |          |        |       |
|                      |  |          |          |        |       |
| ethnicity3cat        |  |          |          |        |       |
| NotHispanic          |  | 1.245418 | .0294182 | 9.29   | 0.000 |
| 1.189074             |  | 1.304432 |          |        |       |
| Missing              |  | 1.318301 | .0462191 | 7.88   | 0.000 |
| 1.230755             |  | 1.412073 |          |        |       |
|                      |  |          |          |        |       |
| smoking4cat          |  |          |          |        |       |
| Former               |  | .7509477 | .0153342 | -14.03 | 0.000 |
| .7214866             |  | .7816118 |          |        |       |
| Never                |  | .6592874 | .0140648 | -19.53 | 0.000 |
| .6322893             |  | .6874384 |          |        |       |
| Missing              |  | 1.416026 | .0524786 | 9.39   | 0.000 |
| 1.316817             |  | 1.52271  |          |        |       |
|                      |  |          |          |        |       |
| gagne                |  | 1.146393 | .0042877 | 36.53  | 0.000 |
| 1.13802              |  | 1.154828 |          |        |       |
| numipadmits          |  | 1.020387 | .0069369 | 2.97   | 0.003 |
| 1.006881             |  | 1.034074 |          |        |       |
| util_numpcstops      |  | 1.002465 | .0029099 | 0.85   | 0.396 |
| .9967781             |  | 1.008185 |          |        |       |
| util_numscstops      |  | .9907894 | .0038424 | -2.39  | 0.017 |
| .9832869             |  | .9983492 |          |        |       |
|                      |  |          |          |        |       |
| nosos11cat           |  |          |          |        |       |
| 2                    |  | .9459805 | .0451239 | -1.16  | 0.244 |
| .8615477             |  | 1.038688 |          |        |       |
| 3                    |  | .9692975 | .0467629 | -0.65  | 0.518 |
| .8818437             |  | 1.065424 |          |        |       |
| 4                    |  | .8547473 | .0429125 | -3.13  | 0.002 |
| .774646              |  | .9431313 |          |        |       |
| 5                    |  | .7876494 | .0402236 | -4.67  | 0.000 |
| .7126296             |  | .8705667 |          |        |       |
| 6                    |  | .7874746 | .0410336 | -4.59  | 0.000 |
| .7110207             |  | .8721493 |          |        |       |
| 7                    |  | .7431751 | .0384667 | -5.73  | 0.000 |
| .6714799             |  | .8225255 |          |        |       |
| 8                    |  | .726324  | .03568   | -6.51  | 0.000 |
| .6596535             |  | .7997328 |          |        |       |
| 9                    |  | .6948543 | .0381959 | -6.62  | 0.000 |
| .6238835             |  | .7738985 |          |        |       |
| 10                   |  | .8022314 | .0464572 | -3.81  | 0.000 |
| .7161543             |  | .8986543 |          |        |       |
| 99                   |  | .8713138 | .0900282 | -1.33  | 0.182 |
| .7115812             |  | 1.066902 |          |        |       |
|                      |  |          |          |        |       |

| canscore7cat         |          |    |          |          |             |
|----------------------|----------|----|----------|----------|-------------|
| 1.648396             | 1.904653 | 2  | 1.771898 | .0653161 | 15.52 0.000 |
| 2.338659             | 2.68736  | 3  | 2.506954 | .0888844 | 25.92 0.000 |
| 3.290511             | 3.845653 | 4  | 3.557269 | .1414773 | 31.91 0.000 |
| 4.306713             | 5.184307 | 5  | 4.72518  | .2235596 | 32.82 0.000 |
| 4.971392             | 6.139206 | 6  | 5.524527 | .2973654 | 31.75 0.000 |
| 1.368981             | 2.389679 | 99 | 1.808708 | .25705   | 4.17 0.000  |
| neareststa3ndistance |          |    | 1.003734 | .0001643 | 22.78 0.000 |
| 1.003412             | 1.004056 |    |          |          |             |

-----  
-----

```

.
. *-----
. * Subgroup Analysis - Age, Adj.
. *-----
.
. local ageimbal    bmi i.ethnicity3cat i.smoking4cat ///
>                               gagne numipadmits util_numpcstops
util_numscstops ///
>                               i.nosos11cat i.canscore7cat
neareststa3ndistance

.
. stcox    timeinfected_0_90 timeinfected_91_180 timeinfected_181_365
///
>                               timeinfected_366_730 `ageimbal' ///
>                               if agecat==1 ///
>                               , efron vce(cluster patientcn)
strata(matchgroupnumber)

```

```

      Failure _d: died_0_730
Analysis time _t: tte_0_730
ID variable:  uniq_patid

```

```

Iteration 0:    log pseudolikelihood = -14558.298
Iteration 1:    log pseudolikelihood = -10426.226
Iteration 2:    log pseudolikelihood = -10288.915
Iteration 3:    log pseudolikelihood = -10285.867
Iteration 4:    log pseudolikelihood = -10285.864
Refining estimates:
Iteration 0:    log pseudolikelihood = -10285.864

```

```

Stratified Cox regression with no ties
Strata variable: matchgroupnumber

```

```

No. of subjects =      670,258                               Number of obs =

```

2,630,678

No. of failures = 12,010

Time at risk = 331392467.5

Wald chi2(31) =

6018.82

Log pseudolikelihood = -10285.864

Prob > chi2 =

0.0000

(Std. err. adjusted for 584,782 clusters

in patienticn)

|                      |          | Haz. ratio | Robust<br>std. err. | z     | P> z  | [95% |
|----------------------|----------|------------|---------------------|-------|-------|------|
| conf. interval]      |          |            |                     |       |       |      |
| timeinfected_0_90    |          | 5.284862   | .2392858            | 36.77 | 0.000 |      |
| 4.836078             | 5.775292 |            |                     |       |       |      |
| timeinfected_91_180  |          | .8990531   | .0605317            | -1.58 | 0.114 |      |
| .7879079             | 1.025877 |            |                     |       |       |      |
| timeinfected_181_365 |          | .671949    | .0338182            | -7.90 | 0.000 |      |
| .6088308             | .7416108 |            |                     |       |       |      |
| timeinfected_366_730 |          | .7167203   | .0439245            | -5.43 | 0.000 |      |
| .6355993             | .8081946 |            |                     |       |       |      |
| bmi                  |          | 1.01642    | .0020623            | 8.03  | 0.000 |      |
| 1.012386             | 1.02047  |            |                     |       |       |      |
| ethnicity3cat        |          |            |                     |       |       |      |
| NotHispanic          |          | 1.042822   | .0492994            | 0.89  | 0.375 |      |
| .9505384             | 1.144065 |            |                     |       |       |      |
| Missing              |          | .9905843   | .0794553            | -0.12 | 0.906 |      |
| .8464788             | 1.159223 |            |                     |       |       |      |
| smoking4cat          |          |            |                     |       |       |      |
| Former               |          | 1.264539   | .0520099            | 5.71  | 0.000 |      |
| 1.166602             | 1.370698 |            |                     |       |       |      |
| Never                |          | 1.106283   | .0494139            | 2.26  | 0.024 |      |
| 1.013552             | 1.207498 |            |                     |       |       |      |
| Missing              |          | 1.494596   | .0891653            | 6.74  | 0.000 |      |
| 1.329666             | 1.679985 |            |                     |       |       |      |
| gagne                |          | 1.281692   | .0096121            | 33.09 | 0.000 |      |
| 1.26299              | 1.30067  |            |                     |       |       |      |
| numipadmits          |          | .9424521   | .0089856            | -6.22 | 0.000 |      |
| .9250041             | .9602291 |            |                     |       |       |      |
| util_numpcstops      |          | 1.00814    | .0018797            | 4.35  | 0.000 |      |
| 1.004463             | 1.011831 |            |                     |       |       |      |
| util_numscstops      |          | .9934476   | .0014898            | -4.38 | 0.000 |      |
| .9905319             | .9963719 |            |                     |       |       |      |
| nosos11cat           |          |            |                     |       |       |      |
| 2                    |          | 1.860846   | .261989             | 4.41  | 0.000 |      |
| 1.412113             | 2.452174 |            |                     |       |       |      |

|          |                      |    |  |          |          |       |       |
|----------|----------------------|----|--|----------|----------|-------|-------|
| 1.555148 | 2.671038             | 3  |  | 2.038102 | .2812301 | 5.16  | 0.000 |
| 1.786006 | 3.064877             | 4  |  | 2.339634 | .3223176 | 6.17  | 0.000 |
| 1.900489 | 3.278782             | 5  |  | 2.496255 | .347292  | 6.58  | 0.000 |
| 2.220662 | 3.817518             | 6  |  | 2.911601 | .4024285 | 7.73  | 0.000 |
| 2.411045 | 4.153437             | 7  |  | 3.16451  | .4390644 | 8.30  | 0.000 |
| 2.392883 | 4.12685              | 8  |  | 3.142462 | .436919  | 8.24  | 0.000 |
| 2.528222 | 4.360661             | 9  |  | 3.320349 | .4617294 | 8.63  | 0.000 |
| 2.685495 | 4.651942             | 10 |  | 3.534511 | .4953993 | 9.01  | 0.000 |
| 3.294301 | 6.391917             | 99 |  | 4.58878  | .7759396 | 9.01  | 0.000 |
|          |                      |    |  |          |          |       |       |
|          | canscore7cat         |    |  |          |          |       |       |
| 1.850708 | 2.337966             | 2  |  | 2.080118 | .1240203 | 12.28 | 0.000 |
| 2.76741  | 3.531771             | 3  |  | 3.126317 | .1945111 | 18.32 | 0.000 |
| 4.532223 | 5.84232              | 4  |  | 5.145746 | .3333184 | 25.29 | 0.000 |
| 8.842903 | 11.77692             | 5  |  | 10.20501 | .7459336 | 31.78 | 0.000 |
| 14.54594 | 20.2643              | 6  |  | 17.16867 | 1.452132 | 33.61 | 0.000 |
| 4.854016 | 9.036311             | 99 |  | 6.622869 | 1.049954 | 11.93 | 0.000 |
|          |                      |    |  |          |          |       |       |
|          | neareststa3ndistance |    |  |          |          |       |       |
| 1.000756 | 1.002465             |    |  | 1.00161  | .0004359 | 3.70  | 0.000 |

-----  
-----

```
. stcox    timeinfected_0_90 timeinfected_91_180 timeinfected_181_365
///
>          timeinfected_366_730 `ageimbal'    ///
>          if agecat==2 ///
>          , efron vce(cluster patientcn)
strata(matchgroupnumber)
```

```
Failure _d: died_0_730
Analysis time _t: tte_0_730
ID variable: uniq_patid
```

```
Iteration 0:    log pseudolikelihood = -53913.685
Iteration 1:    log pseudolikelihood = -44548.506
Iteration 2:    log pseudolikelihood = -44390.217
Iteration 3:    log pseudolikelihood = -44389.356
```

Iteration 4: log pseudolikelihood = -44389.356

Refining estimates:

Iteration 0: log pseudolikelihood = -44389.356

Stratified Cox regression with Efron method for ties

Strata variable: matchgroupnumber

No. of subjects = 513,602

1,962,091

No. of failures = 50,712

Time at risk = 241928487.5

Number of obs =

Wald chi2(31) =

16103.99

Log pseudolikelihood = -44389.356

Prob > chi2 =

0.0000

(Std. err. adjusted for 453,183 clusters

in patienticn)

|                      |          | Robust    |        |       |      |
|----------------------|----------|-----------|--------|-------|------|
| _t   Haz. ratio      |          | std. err. | z      | P> z  | [95% |
| conf. interval]      |          |           |        |       |      |
| timeinfected_0_90    | 6.789824 | .1469138  | 88.52  | 0.000 |      |
| 6.507899             | 7.083963 |           |        |       |      |
| timeinfected_91_180  | 1.100616 | .0351329  | 3.00   | 0.003 |      |
| 1.033867             | 1.171675 |           |        |       |      |
| timeinfected_181_365 | .7972723 | .0213794  | -8.45  | 0.000 |      |
| .7564515             | .8402959 |           |        |       |      |
| timeinfected_366_730 | .784958  | .0226386  | -8.40  | 0.000 |      |
| .741818              | .8306068 |           |        |       |      |
| bmi                  | .9806657 | .0012335  | -15.52 | 0.000 |      |
| .9782511             | .9830863 |           |        |       |      |
| ethnicity3cat        |          |           |        |       |      |
| NotHispanic          | 1.168981 | .0334091  | 5.46   | 0.000 |      |
| 1.105301             | 1.236331 |           |        |       |      |
| Missing              | 1.225305 | .0521831  | 4.77   | 0.000 |      |
| 1.127181             | 1.331972 |           |        |       |      |
| smoking4cat          |          |           |        |       |      |
| Former               | .9551981 | .0220499  | -1.99  | 0.047 |      |
| .9129443             | .9994076 |           |        |       |      |
| Never                | .8393279 | .0205431  | -7.16  | 0.000 |      |
| .8000146             | .880573  |           |        |       |      |
| Missing              | 1.723717 | .0961577  | 9.76   | 0.000 |      |
| 1.545189             | 1.922872 |           |        |       |      |
| gagne                | 1.162702 | .0046521  | 37.68  | 0.000 |      |
| 1.153619             | 1.171855 |           |        |       |      |
| numipadmits          | .9902413 | .0072735  | -1.34  | 0.182 |      |
| .9760877             | 1.0046   |           |        |       |      |

|                      |          |          |       |       |
|----------------------|----------|----------|-------|-------|
| util_numpcstops      | 1.003995 | .0032129 | 1.25  | 0.213 |
| .9977178 1.010312    |          |          |       |       |
| util_numscstops      | .9929268 | .0042029 | -1.68 | 0.094 |
| .9847234 1.001199    |          |          |       |       |
|                      |          |          |       |       |
| nosos11cat           |          |          |       |       |
| 2                    | .9713428 | .0787541 | -0.36 | 0.720 |
| .8286271 1.138639    |          |          |       |       |
| 3                    | 1.060664 | .0859827 | 0.73  | 0.468 |
| .9048472 1.243313    |          |          |       |       |
| 4                    | .9181926 | .0751208 | -1.04 | 0.297 |
| .7821568 1.077888    |          |          |       |       |
| 5                    | .8083899 | .0668536 | -2.57 | 0.010 |
| .6874273 .9506376    |          |          |       |       |
| 6                    | .7646974 | .0634564 | -3.23 | 0.001 |
| .6499124 .8997552    |          |          |       |       |
| 7                    | .7171678 | .0593465 | -4.02 | 0.000 |
| .6097936 .8434488    |          |          |       |       |
| 8                    | .6960344 | .0562486 | -4.48 | 0.000 |
| .5940767 .8154904    |          |          |       |       |
| 9                    | .6528993 | .0552624 | -5.04 | 0.000 |
| .5530942 .770714     |          |          |       |       |
| 10                   | .715163  | .0624061 | -3.84 | 0.000 |
| .6027373 .8485591    |          |          |       |       |
| 99                   | .9311091 | .1480032 | -0.45 | 0.653 |
| .6818659 1.271458    |          |          |       |       |
|                      |          |          |       |       |
| canscore7cat         |          |          |       |       |
| 2                    | 2.000095 | .0888593 | 15.60 | 0.000 |
| 1.833301 2.182064    |          |          |       |       |
| 3                    | 3.064247 | .1343136 | 25.55 | 0.000 |
| 2.811988 3.339136    |          |          |       |       |
| 4                    | 4.265834 | .2116398 | 29.24 | 0.000 |
| 3.870557 4.701478    |          |          |       |       |
| 5                    | 5.710978 | .3308729 | 30.07 | 0.000 |
| 5.097943 6.39773     |          |          |       |       |
| 6                    | 7.54406  | .5008294 | 30.44 | 0.000 |
| 6.623632 8.592392    |          |          |       |       |
| 99                   | 3.041893 | .5061014 | 6.69  | 0.000 |
| 2.195449 4.214678    |          |          |       |       |
|                      |          |          |       |       |
| neareststa3ndistance | 1.00334  | .0001943 | 17.21 | 0.000 |
| 1.002959 1.003721    |          |          |       |       |

```

-----
.
. stcox   timeinfected_0_90 timeinfected_91_180 timeinfected_181_365
///
>         timeinfected_366_730 `ageimbal'   ///
>         if agecat==3 ///
>         , efron vce(cluster patientcn)
strata(matchgroupnumber)

```

Failure \_d: died\_0\_730  
 Analysis time \_t: tte\_0\_730  
 ID variable: uniq\_patid

Iteration 0: log pseudolikelihood = -3847.2796  
 Iteration 1: log pseudolikelihood = -3282.884  
 Iteration 2: log pseudolikelihood = -3261.7561  
 Iteration 3: log pseudolikelihood = -3261.483  
 Iteration 4: log pseudolikelihood = -3261.4829  
 Refining estimates:  
 Iteration 0: log pseudolikelihood = -3261.4829

Stratified Cox regression with Efron method for ties  
 Strata variable: matchgroupnumber

No. of subjects = 61,624 Number of obs = 214,806  
 No. of failures = 19,675  
 Time at risk = 25,302,394  
 Wald chi2(31) = 1063.16  
 Log pseudolikelihood = -3261.4829 Prob > chi2 = 0.0000

(Std. err. adjusted for 55,357 clusters

in patienticn)

|                      | _t       | Haz. ratio | Robust<br>std. err. | z      | P> z  | [95%<br>conf. interval] |
|----------------------|----------|------------|---------------------|--------|-------|-------------------------|
| timeinfected_0_90    | 5.734596 | 6.671193   | .5149214            | 24.59  | 0.000 | 7.760759                |
| timeinfected_91_180  | .8280701 | 1.012016   | .1035795            | 0.12   | 0.907 | 1.236823                |
| timeinfected_181_365 | .85402   | .995476    | .0778448            | -0.06  | 0.954 | 1.160362                |
| timeinfected_366_730 | .7978443 | .961431    | .0914894            | -0.41  | 0.679 | 1.158559                |
| bmi                  | .9499313 | .9571774   | .0037111            | -11.29 | 0.000 | .9644787                |
| ethnicity3cat        |          |            |                     |        |       |                         |
| NotHispanic          | 1.150635 | 1.395965   | .1376561            | 3.38   | 0.001 | 1.693602                |
| Missing              | 1.157539 | 1.489865   | .1918538            | 3.10   | 0.002 | 1.917602                |
| smoking4cat          |          |            |                     |        |       |                         |
| Former               | .7860681 | .9711018   | .1047362            | -0.27  | 0.786 | 1.199691                |
| Never                |          | .9014219   | .0993692            | -0.94  | 0.346 |                         |



|                      |                 |  |          |          |             |
|----------------------|-----------------|--|----------|----------|-------------|
| .7262648             | 1.118822        |  |          |          |             |
|                      | Missing         |  | 1.675092 | .2065422 | 4.18 0.000  |
| 1.315479             | 2.133013        |  |          |          |             |
|                      |                 |  |          |          |             |
|                      | gagne           |  | 1.08911  | .0097226 | 9.56 0.000  |
| 1.07022              | 1.108334        |  |          |          |             |
|                      | numipadmits     |  | .9908893 | .0140306 | -0.65 0.518 |
| .9637679             | 1.018774        |  |          |          |             |
|                      | util_numpcstops |  | 1.01271  | .0024446 | 5.23 0.000  |
| 1.00793              | 1.017513        |  |          |          |             |
|                      | util_numscstops |  | .9784877 | .0021997 | -9.67 0.000 |
| .9741858             | .9828086        |  |          |          |             |
|                      |                 |  |          |          |             |
|                      | nosos11cat      |  |          |          |             |
|                      | 2               |  | .9429193 | .0977917 | -0.57 0.571 |
| .769476              | 1.155458        |  |          |          |             |
|                      | 3               |  | .9031725 | .0983665 | -0.94 0.350 |
| .7295658             | 1.11809         |  |          |          |             |
|                      | 4               |  | .8953397 | .1002418 | -0.99 0.323 |
| .7189318             | 1.115034        |  |          |          |             |
|                      | 5               |  | .8658082 | .1022117 | -1.22 0.222 |
| .6869646             | 1.091212        |  |          |          |             |
|                      | 6               |  | 1.096416 | .1298875 | 0.78 0.437  |
| .8692355             | 1.382972        |  |          |          |             |
|                      | 7               |  | .9816744 | .1175476 | -0.15 0.877 |
| .7763239             | 1.241344        |  |          |          |             |
|                      | 8               |  | .9285591 | .1156599 | -0.60 0.552 |
| .72742               | 1.185315        |  |          |          |             |
|                      | 9               |  | .9388058 | .115931  | -0.51 0.609 |
| .7369921             | 1.195883        |  |          |          |             |
|                      | 10              |  | 1.197808 | .1488669 | 1.45 0.146  |
| .9388527             | 1.528188        |  |          |          |             |
|                      | 99              |  | 1.116855 | .2182779 | 0.57 0.572  |
| .7614444             | 1.638157        |  |          |          |             |
|                      |                 |  |          |          |             |
|                      | canscore7cat    |  |          |          |             |
|                      | 2               |  | .1010701 | .0870501 | -2.66 0.008 |
| .0186851             | .5466999        |  |          |          |             |
|                      | 3               |  | .2257802 | .188703  | -1.78 0.075 |
| .0438801             | 1.161728        |  |          |          |             |
|                      | 4               |  | .3572221 | .2985071 | -1.23 0.218 |
| .0694457             | 1.837518        |  |          |          |             |
|                      | 5               |  | .4832342 | .4045207 | -0.87 0.385 |
| .0936715             | 2.492918        |  |          |          |             |
|                      | 6               |  | .5566018 | .4673908 | -0.70 0.485 |
| .1073426             | 2.886139        |  |          |          |             |
|                      | 99              |  | .5242315 | .4522857 | -0.75 0.454 |
| .0966365             | 2.843841        |  |          |          |             |
|                      |                 |  |          |          |             |
| neareststa3ndistance |                 |  | 1.002624 | .0006049 | 4.34 0.000  |
| 1.001439             | 1.00381         |  |          |          |             |

-----

```

.
.
. *-----
. * Subgroup Analyses - Comorbidities, Adj.
. *-----
.
. * Subgroup analysis by tertile of comorbidity & adjust for
. * covariates
.
. * create tertiles of Gagne scores
. sum gagne, de

```

gagne score (min=-2, max=24)

| Percentiles |    | Smallest |             |           |
|-------------|----|----------|-------------|-----------|
| 1%          | -1 | -2       |             |           |
| 5%          | -1 | -2       |             |           |
| 10%         | -1 | -2       | Obs         | 4,807,575 |
| 25%         | 0  | -2       | Sum of wgt. | 4,807,575 |
| 50%         | 1  |          | Mean        | 1.352648  |
|             |    | Largest  | Std. dev.   | 2.190437  |
| 75%         | 2  | 20       | Variance    | 4.798016  |
| 90%         | 4  | 20       | Skewness    | 1.904482  |
| 95%         | 6  | 20       | Kurtosis    | 7.836349  |
| 99%         | 9  | 22       |             |           |

```

. histogram gagne
(bin=66, start=-2, width=.36363636)

. xtile gagne_tertile = gagne, nq(3)

. bysort gagne_tertile: sum gagne, de

```

```

-----
-----
-----
-> gagne_tertile = 1

```

gagne score (min=-2, max=24)

| Percentiles |    | Smallest |             |           |
|-------------|----|----------|-------------|-----------|
| 1%          | -1 | -2       |             |           |
| 5%          | -1 | -2       |             |           |
| 10%         | -1 | -2       | Obs         | 2,188,313 |
| 25%         | 0  | -2       | Sum of wgt. | 2,188,313 |
| 50%         | 0  |          | Mean        | -.2387684 |
|             |    | Largest  | Std. dev.   | .4293505  |
| 75%         | 0  | 0        | Variance    | .1843419  |
| 90%         | 0  | 0        | Skewness    | -1.274364 |
| 95%         | 0  | 0        | Kurtosis    | 2.772565  |
| 99%         | 0  | 0        |             |           |

```
-----  
-----  
-----  
-> gagne_tertile = 2
```

```
gagne score (min=-2, max=24)
```

```
-----  
Percentiles      Smallest  
1%               1           1  
5%               1           1  
10%              1           1      Obs           1,039,996  
25%              1           1      Sum of wgt.  1,039,996  
  
50%              1  
Largest  
75%              1           1      Mean           1  
90%              1           1      Std. dev.      0  
95%              1           1      Variance       0  
99%              1           1      Skewness       .  
Kurtosis        .
```

```
-----  
-----  
-----  
-> gagne_tertile = 3
```

```
gagne score (min=-2, max=24)
```

```
-----  
Percentiles      Smallest  
1%               2           2  
5%               2           2  
10%              2           2      Obs           1,579,266  
25%              2           2      Sum of wgt.  1,579,266  
  
50%              3  
Largest  
75%              5           20     Mean           3.790027  
90%              7           20     Std. dev.      2.195128  
95%              8           20     Variance       4.818587  
99%              11          22     Skewness       1.719706  
Kurtosis        6.502357
```

```
.  
. * Tertiles of Gagne scores  
. local imbalanced ageatindexdate bmi i.ethnicity3cat i.smoking4cat ///  
> numipadmits util_numpcstops  
util_numscstops ///  
> i.nosos11cat i.canscore7cat  
neareststa3ndistance  
  
.   
. forval i=1/3 {  
  2.  
.      stcox      timeinfected_0_90 timeinfected_91_180  
timeinfected_181_365 ///
```

```

> timeinfected_366_730 `imbalanced' ///
> if gagne_tertile==`i' ///
> , efron vce(cluster patienticn)
strata(matchgroupnumber)
  3. }

```

```

      Failure _d: died_0_730
Analysis time _t: tte_0_730
ID variable: uniq_patid

```

```

Iteration 0: log pseudolikelihood = -15700.491
Iteration 1: log pseudolikelihood = -9803.7776
Iteration 2: log pseudolikelihood = -9309.1306
Iteration 3: log pseudolikelihood = -9270.3879
Iteration 4: log pseudolikelihood = -9269.9866
Iteration 5: log pseudolikelihood = -9269.9865
Refining estimates:
Iteration 0: log pseudolikelihood = -9269.9865

```

```

Stratified Cox regression with no ties
Strata variable: matchgroupnumber

```

```

No. of subjects = 558,603          Number of obs =
2,188,313
No. of failures = 12,952
Time at risk = 273188034

Wald chi2(31) =
6841.31
Log pseudolikelihood = -9269.9865   Prob > chi2 =
0.0000

```

(Std. err. adjusted for 502,965 clusters in patienticn)

|                      | _t       | Haz. ratio | Robust<br>std. err. | z     | P> z  | [95%<br>conf. interval] |
|----------------------|----------|------------|---------------------|-------|-------|-------------------------|
| timeinfected_0_90    | 6.86848  | 7.500308   | .3367596            | 44.88 | 0.000 | 8.190257                |
| timeinfected_91_180  | .940942  | 1.092474   | .0832297            | 1.16  | 0.246 | 1.26841                 |
| timeinfected_181_365 | .5938205 | .6642259   | .0379718            | -7.16 | 0.000 | .7429788                |
| timeinfected_366_730 | .6110001 | .6921604   | .0440451            | -5.78 | 0.000 | .7841015                |
| ageatindexdate       | 1.075273 | 1.07893    | .0018691            | 43.85 | 0.000 | 1.0826                  |
| bmi                  | .9931656 | .9983562   | .0026552            | -0.62 | 0.536 | 1.003574                |
| ethnicity3cat        |          |            |                     |       |       |                         |

|          |                 |  |          |          |        |       |
|----------|-----------------|--|----------|----------|--------|-------|
| 1.132143 | NotHispanic     |  | 1.280785 | .080613  | 3.93   | 0.000 |
|          | 1.448942        |  |          |          |        |       |
| 1.039488 | Missing         |  | 1.234298 | .1081758 | 2.40   | 0.016 |
|          | 1.465618        |  |          |          |        |       |
|          | smoking4cat     |  |          |          |        |       |
| .5941635 | Former          |  | .6624782 | .0367862 | -7.42  | 0.000 |
|          | .7386474        |  |          |          |        |       |
| .4849431 | Never           |  | .5459423 | .0330027 | -10.01 | 0.000 |
|          | .6146144        |  |          |          |        |       |
| 1.527894 | Missing         |  | 1.706001 | .0959742 | 9.49   | 0.000 |
|          | 1.904869        |  |          |          |        |       |
|          | numipadmits     |  | .9505709 | .0367023 | -1.31  | 0.189 |
| .8812901 | 1.025298        |  |          |          |        |       |
| .9767869 | util_numpcstops |  | .9832362 | .0033014 | -5.04  | 0.000 |
|          | .989728         |  |          |          |        |       |
| .9910977 | util_numscstops |  | .9968608 | .0029489 | -1.06  | 0.288 |
|          | 1.002657        |  |          |          |        |       |
|          | nosos11cat      |  |          |          |        |       |
| .7633139 | 2               |  | .8761236 | .0616149 | -1.88  | 0.060 |
|          | 1.005605        |  |          |          |        |       |
| .7456029 | 3               |  | .8618274 | .0636981 | -2.01  | 0.044 |
|          | .996169         |  |          |          |        |       |
| .679343  | 4               |  | .7932618 | .0627446 | -2.93  | 0.003 |
|          | .9262837        |  |          |          |        |       |
| .650369  | 5               |  | .7636355 | .0625533 | -3.29  | 0.001 |
|          | .8966281        |  |          |          |        |       |
| .6832348 | 6               |  | .8066059 | .0683144 | -2.54  | 0.011 |
|          | .9522539        |  |          |          |        |       |
| .6459165 | 7               |  | .7688624 | .0683523 | -2.96  | 0.003 |
|          | .9152103        |  |          |          |        |       |
| .6296308 | 8               |  | .7526862 | .0685552 | -3.12  | 0.002 |
|          | .8997916        |  |          |          |        |       |
| .5838196 | 9               |  | .7029997 | .06663   | -3.72  | 0.000 |
|          | .8465092        |  |          |          |        |       |
| .6683871 | 10              |  | .8173364 | .0838966 | -1.97  | 0.049 |
|          | .9994789        |  |          |          |        |       |
| .5305645 | 99              |  | .698701  | .0981341 | -2.55  | 0.011 |
|          | .9201199        |  |          |          |        |       |
|          | canscore7cat    |  |          |          |        |       |
| 1.43561  | 2               |  | 1.566203 | .0695732 | 10.10  | 0.000 |
|          | 1.708676        |  |          |          |        |       |
| 1.946861 | 3               |  | 2.140287 | .1034365 | 15.75  | 0.000 |
|          | 2.352931        |  |          |          |        |       |
| 2.916239 | 4               |  | 3.256214 | .1831993 | 20.98  | 0.000 |
|          | 3.635824        |  |          |          |        |       |
| 3.399452 | 5               |  | 3.971556 | .3151847 | 17.38  | 0.000 |
|          | 4.639941        |  |          |          |        |       |
| 3.279476 | 6               |  | 4.446388 | .6905831 | 9.61   | 0.000 |
|          | 6.028514        |  |          |          |        |       |
|          | 99              |  | .4094631 | .0807369 | -4.53  | 0.000 |

```
.2782128      .6026324
neareststa3ndistance |      1.003543      .0004132      8.59      0.000
1.002733      1.004353
-----
-----
```

```
Failure _d: died_0_730
Analysis time _t: tte_0_730
ID variable: uniq_patid
```

```
Iteration 0: log pseudolikelihood = -6722.4221
Iteration 1: log pseudolikelihood = -4490.065
Iteration 2: log pseudolikelihood = -4255.7469
Iteration 3: log pseudolikelihood = -4235.9202
Iteration 4: log pseudolikelihood = -4235.6764
Iteration 5: log pseudolikelihood = -4235.6764
Refining estimates:
Iteration 0: log pseudolikelihood = -4235.6764
```

```
Stratified Cox regression with Efron method for ties
Strata variable: matchgroupnumber
```

```
No. of subjects = 266,962 Number of obs =
1,039,996
No. of failures = 11,065
Time at risk = 129794950
Wald chi2(31) =
2722.68
Log pseudolikelihood = -4235.6764 Prob > chi2 =
0.0000
```

(Std. err. adjusted for 238,877 clusters in patienticn)

```
-----
-----
              |
              | Robust
              | std. err.
              | z      P>|z|      [95%
              | conf. interval]
-----+-----
timeinfected_0_90 | 6.690617 .4389967 28.97 0.000
5.883227 7.60881
timeinfected_91_180 | .9872681 .0927747 -0.14 0.892
.8211959 1.186925
timeinfected_181_365 | .6966577 .0617185 -4.08 0.000
.5856115 .8287609
timeinfected_366_730 | .648577 .0603411 -4.65 0.000
.5404669 .7783126
ageatindexdate | 1.071258 .0024072 30.63 0.000
1.06655 1.075986
bmi | .9884357 .0031168 -3.69 0.000
.9823458 .9945634
|
```

|               |                 |          |          |       |       |
|---------------|-----------------|----------|----------|-------|-------|
| ethnicity3cat |                 |          |          |       |       |
| 1.247097      | NotHispanic     | 1.475896 | .126844  | 4.53  | 0.000 |
|               | 1.746671        |          |          |       |       |
| 1.303465      | Missing         | 1.666383 | .2088367 | 4.07  | 0.000 |
|               | 2.130347        |          |          |       |       |
| smoking4cat   |                 |          |          |       |       |
| .5333169      | Former          | .6098506 | .0417252 | -7.23 | 0.000 |
|               | .6973673        |          |          |       |       |
| .461068       | Never           | .5384721 | .0426363 | -7.82 | 0.000 |
|               | .6288708        |          |          |       |       |
| 1.006049      | Missing         | 1.253396 | .1405786 | 2.01  | 0.044 |
|               | 1.561556        |          |          |       |       |
| numipadmits   |                 |          |          |       |       |
| .878003       | 1.032679        | .9522055 | .0394156 | -1.18 | 0.237 |
| .9889334      | util_numpcstops | 1.004287 | .0078943 | 0.54  | 0.586 |
|               | 1.01988         |          |          |       |       |
| .9577923      | util_numscstops | .9797727 | .0113424 | -1.77 | 0.078 |
|               | 1.002258        |          |          |       |       |
| nosos11cat    |                 |          |          |       |       |
| .8340965      | 2               | 1.127268 | .173236  | 0.78  | 0.436 |
|               | 1.523484        |          |          |       |       |
| .6919769      | 3               | .9379436 | .1455454 | -0.41 | 0.680 |
|               | 1.271341        |          |          |       |       |
| .5024765      | 4               | .6826789 | .1067492 | -2.44 | 0.015 |
|               | .9275072        |          |          |       |       |
| .5218845      | 5               | .7095511 | .1112083 | -2.19 | 0.029 |
|               | .9647016        |          |          |       |       |
| .5238781      | 6               | .713858  | .1126987 | -2.14 | 0.033 |
|               | .9727323        |          |          |       |       |
| .4938126      | 7               | .674498  | .1073065 | -2.48 | 0.013 |
|               | .9212958        |          |          |       |       |
| .474368       | 8               | .6487984 | .103657  | -2.71 | 0.007 |
|               | .8873689        |          |          |       |       |
| .4460962      | 9               | .6125635 | .0991114 | -3.03 | 0.002 |
|               | .8411503        |          |          |       |       |
| .455828       | 10              | .6310939 | .1047568 | -2.77 | 0.006 |
|               | .8737496        |          |          |       |       |
| .3643268      | 99              | .6612896 | .2011372 | -1.36 | 0.174 |
|               | 1.200307        |          |          |       |       |
| canscore7cat  |                 |          |          |       |       |
| 1.314485      | 2               | 1.61206  | .1678453 | 4.59  | 0.000 |
|               | 1.977002        |          |          |       |       |
| 1.737779      | 3               | 2.125999 | .2187151 | 7.33  | 0.000 |
|               | 2.600948        |          |          |       |       |
| 2.358786      | 4               | 2.90234  | .3070768 | 10.07 | 0.000 |
|               | 3.571151        |          |          |       |       |
| 3.999329      | 5               | 5.057096 | .6054842 | 13.54 | 0.000 |
|               | 6.394627        |          |          |       |       |
| 4.834054      | 6               | 6.567526 | 1.026871 | 12.04 | 0.000 |
|               | 8.922615        |          |          |       |       |

```

          99 | .7513228 .3286854 -0.65 0.513
.3187474 1.770951
          |
neareststa3ndistance | 1.003733 .0006102 6.13 0.000
1.002537 1.004929
-----
-----

```

```

Failure _d: died_0_730
Analysis time _t: tte_0_730
ID variable: uniq_patid

```

```

Iteration 0: log pseudolikelihood = -61611.495
Iteration 1: log pseudolikelihood = -48752.581
Iteration 2: log pseudolikelihood = -48126.01
Iteration 3: log pseudolikelihood = -48110.657
Iteration 4: log pseudolikelihood = -48110.59
Iteration 5: log pseudolikelihood = -48110.59
Refining estimates:
Iteration 0: log pseudolikelihood = -48110.59

```

```

Stratified Cox regression with Efron method for ties
Strata variable: matchgroupnumber

```

```

No. of subjects = 419,919 Number of obs =
1,579,266
No. of failures = 58,380
Time at risk = 195640364.5
Wald chi2(31) =
20250.19
Log pseudolikelihood = -48110.59 Prob > chi2 =
0.0000

```

```

(STD. ERR. ADJUSTED FOR 358,321 CLUSTERS
IN PATIENTICN)
-----
-----

```

|                      | _t       | Haz. ratio | Robust<br>std. err. | z      | P> z  | [95%<br>conf. interval] |
|----------------------|----------|------------|---------------------|--------|-------|-------------------------|
| timeinfected_0_90    | 5.016247 | 5.216509   | .1041893            | 82.70  | 0.000 | 5.424766                |
| timeinfected_91_180  | 1.049011 | 1.11421    | .0342786            | 3.52   | 0.000 | 1.183462                |
| timeinfected_181_365 | .8564612 | .896399    | .0208447            | -4.70  | 0.000 | .9381991                |
| timeinfected_366_730 | .7947592 | .8391086   | .0232476            | -6.33  | 0.000 | .8859329                |
| ageatindexdate       | 1.055342 | 1.056754   | .0007212            | 80.88  | 0.000 | 1.058169                |
| bmi                  | .9704164 | .9723692   | .0009973            | -27.32 | 0.000 | .9743259                |



|          |                 |          |          |        |       |
|----------|-----------------|----------|----------|--------|-------|
|          | ethnicity3cat   |          |          |        |       |
| 1.231576 | NotHispanic     | 1.298186 | .0348883 | 9.71   | 0.000 |
|          | 1.368398        |          |          |        |       |
| 1.224936 | Missing         | 1.330528 | .0561322 | 6.77   | 0.000 |
|          | 1.445221        |          |          |        |       |
|          | smoking4cat     |          |          |        |       |
| .7257055 | Former          | .7561238 | .0158406 | -13.34 | 0.000 |
|          | .7878171        |          |          |        |       |
| .6365601 | Never           | .6661088 | .0154207 | -17.55 | 0.000 |
|          | .697029         |          |          |        |       |
| 1.16591  | Missing         | 1.249002 | .0438704 | 6.33   | 0.000 |
|          | 1.338015        |          |          |        |       |
|          | numipadmits     |          |          |        |       |
| 1.081275 | 1.096878        | 1.089049 | .0039806 | 23.34  | 0.000 |
|          | util_numpcstops |          |          |        |       |
| 1.002006 | 1.00431         | 1.003157 | .0005878 | 5.38   | 0.000 |
|          | util_numscstops |          |          |        |       |
| .9910437 | .9931722        | .9921074 | .000543  | -14.48 | 0.000 |
|          | nosos11cat      |          |          |        |       |
| .9356971 | 2               | 1.228826 | .1708616 | 1.48   | 0.138 |
|          | 1.613784        |          |          |        |       |
| .9322123 | 3               | 1.188955 | .147572  | 1.39   | 0.163 |
|          | 1.516407        |          |          |        |       |
| .8151257 | 4               | 1.032778 | .1247076 | 0.27   | 0.789 |
|          | 1.308547        |          |          |        |       |
| .5919168 | 5               | .746758  | .0885363 | -2.46  | 0.014 |
|          | .9421046        |          |          |        |       |
| .5580561 | 6               | .7019939 | .0821868 | -3.02  | 0.003 |
|          | .8830571        |          |          |        |       |
| .5167881 | 7               | .6491978 | .0755549 | -3.71  | 0.000 |
|          | .815533         |          |          |        |       |
| .5031058 | 8               | .6314767 | .0732206 | -3.96  | 0.000 |
|          | .7926022        |          |          |        |       |
| .4806477 | 9               | .6028599 | .069684  | -4.38  | 0.000 |
|          | .7561465        |          |          |        |       |
| .5800953 | 10              | .7274012 | .0839814 | -2.76  | 0.006 |
|          | .9121129        |          |          |        |       |
| .6341112 | 99              | .8319036 | .1152345 | -1.33  | 0.184 |
|          | 1.091392        |          |          |        |       |
|          | canscore7cat    |          |          |        |       |
| 1.346053 | 2               | 1.704064 | .2050474 | 4.43   | 0.000 |
|          | 2.157296        |          |          |        |       |
| 1.725313 | 3               | 2.154765 | .2443652 | 6.77   | 0.000 |
|          | 2.691114        |          |          |        |       |
| 2.329362 | 4               | 2.903397 | .3263227 | 9.48   | 0.000 |
|          | 3.618894        |          |          |        |       |
| 3.146772 | 5               | 3.927339 | .4440077 | 12.10  | 0.000 |
|          | 4.901528        |          |          |        |       |
|          | 6               | 5.082562 | .5824803 | 14.19  | 0.000 |

```

4.060054      6.362583
              99 |      2.764754      .3918539      7.18      0.000
2.09418      3.650051
              |
neareststa3ndistance |      1.004875      .0002013      24.28      0.000
1.004481      1.00527
-----
-----

```

```

.
.
.
. *****
. * PP1: Per Protocol for IPCWs - Censoring at Crossover Infections *
. *****
.

```

```

. *-----
. * Prepping Data for IPCWs and Table 1
. *-----
.

```

```

. use Data\mortality_varforcox_20230516, clear
(Created in file
'P:\ORD_Ioannou_202104007D\MethodsGroup\Programs\CORC_DataExplor)

```

```

. * create ttinfection variable
. gen ttinfection = futureinfectedcontrolindexdate - index_dt_case
(1,108,158 missing values generated)

```

```

. sum ttinfection

```

| Variable    | Obs     | Mean     | Std. dev. | Min | Max |
|-------------|---------|----------|-----------|-----|-----|
| ttinfection | 137,326 | 338.8583 | 179.3397  | 0   | 867 |

```

. count if ttinfection==0
6

```

```

. *-----
.
. * identify those who die during each period; those who die after
infection
. * crossover are coded as not dead at the time of crossover
. *-----
-----

```

```

.
. * Died Index Day-Day 90;
. gen died_0_90_crossover = .
(1,245,484 missing values generated)

. replace died_0_90_crossover = 1 if inrange(indextodeath_caseindex, 0,
90)
(23,814 real changes made)

```

```
. replace died_0_90_crossover = 0 if indextodeath_caseindex>90
(1,221,670 real changes made)

. replace died_0_90_crossover = 0 if indextodeath_caseindex>ttinfection
(1,157 real changes made)
```

```
.
. tab died_0_90 died_0_90_crossover, m
```

| died_0_90 | died_0_90_crossover |        | Total     |
|-----------|---------------------|--------|-----------|
|           | 0                   | 1      |           |
| 0         | 1,221,670           | 0      | 1,221,670 |
| 1         | 1,157               | 22,657 | 23,814    |
| Total     | 1,222,827           | 22,657 | 1,245,484 |

```
. tab died_0_90_crossover case, m
```

| died_0_90_crossover | indicator: is<br>`index_dt` the date<br>of the first positive<br>covid-19 test result<br>for |         | Total     |
|---------------------|----------------------------------------------------------------------------------------------|---------|-----------|
|                     | 0                                                                                            | 1       |           |
| 0                   | 1,027,181                                                                                    | 195,646 | 1,222,827 |
| 1                   | 10,242                                                                                       | 12,415  | 22,657    |
| Total               | 1,037,423                                                                                    | 208,061 | 1,245,484 |

```
.
. * Died Day 91-180;
. gen died_91_180_crossover = .
(1,245,484 missing values generated)

. replace died_91_180_crossover = 1 if inrange(indextodeath_caseindex,
91, 180)
(12,359 real changes made)

. replace died_91_180_crossover = 0 if indextodeath_caseindex>180
(1,209,311 real changes made)

. replace died_91_180_crossover = 0 if
indextodeath_caseindex>ttinfection
(2,424 real changes made)

. replace died_91_180_crossover = 0 if
(indextodeath_caseindex>ttstudyend) & (inrange(indextodeath_caseindex,
91, 180)) ///
>
& (inrange(ttstudyend, 91, 180))
(0 real changes made)
```

```
. tab died_91_180 died_91_180_crossover, m //missing represents those
who were censored in period 1
```

| died_91_18 | died_91_180_crossover |        | .      | Total     |
|------------|-----------------------|--------|--------|-----------|
| 0          | 0                     | 1      | .      |           |
| 0          | 1,209,311             | 0      | 0      | 1,209,311 |
| 1          | 1,267                 | 11,092 | 0      | 12,359    |
| .          | 1,157                 | 0      | 22,657 | 23,814    |
| Total      | 1,211,735             | 11,092 | 22,657 | 1,245,484 |

```
. tab died_91_180_crossover case, m
```

| died_91_18 | indicator: is         |         | Total     |
|------------|-----------------------|---------|-----------|
| 0_crossove | `index_dt` the date   |         |           |
| r          | of the first positive |         |           |
|            | covid-19 test result  |         |           |
|            | for                   |         |           |
|            | 0                     | 1       | Total     |
| 0          | 1,018,133             | 193,602 | 1,211,735 |
| 1          | 9,048                 | 2,044   | 11,092    |
| .          | 10,242                | 12,415  | 22,657    |
| Total      | 1,037,423             | 208,061 | 1,245,484 |

```
.
. * Died Day 181-365;
. gen died_181_365_crossover = .
(1,245,484 missing values generated)

. replace died_181_365_crossover = 1 if inrange(indextodeath_caseindex,
181, 365)
(26,130 real changes made)

. replace died_181_365_crossover = 0 if indextodeath_caseindex>365
(1,183,181 real changes made)

. replace died_181_365_crossover = 0 if
indextodeath_caseindex>ttinfection
(6,211 real changes made)

. replace died_181_365_crossover = 0 if
(indextodeath_caseindex>ttstudyend) & (inrange(indextodeath_caseindex,
181, 365)) ///
>
& (inrange(ttstudyend, 181, 365))
(59 real changes made)

.
. tab died_181_365 died_181_365_crossover, m //missing represents those
who were censored in period 1&2
```

| died_181_365_crossover | died_181_365_crossover |        |        | Total     |
|------------------------|------------------------|--------|--------|-----------|
|                        | 0                      | 1      | .      |           |
| 0                      | 1,183,244              | 0      | 0      | 1,183,244 |
| 1                      | 3,783                  | 22,284 | 0      | 26,067    |
| .                      | 2,424                  | 0      | 33,749 | 36,173    |
| Total                  | 1,189,451              | 22,284 | 33,749 | 1,245,484 |

```
. tab died_181_365_crossover case, m
```

| died_181_365_crossover | indicator: is<br>'index_dt' the date<br>of the first positive<br>covid-19 test result<br>for |         |           | Total |
|------------------------|----------------------------------------------------------------------------------------------|---------|-----------|-------|
|                        | 0                                                                                            | 1       | .         |       |
| 0                      | 999,281                                                                                      | 190,170 | 1,189,451 |       |
| 1                      | 18,852                                                                                       | 3,432   | 22,284    |       |
| .                      | 19,290                                                                                       | 14,459  | 33,749    |       |
| Total                  | 1,037,423                                                                                    | 208,061 | 1,245,484 |       |

```
.
. * Died Day 366-730;
. gen died_366_730_crossover = .
(1,245,484 missing values generated)

. replace died_366_730_crossover = 1 if inrange(indextodeath_caseindex,
366, 730)
(32,904 real changes made)

. replace died_366_730_crossover = 0 if indextodeath_caseindex>730
(1,150,277 real changes made)

. replace died_366_730_crossover = 0 if
indextodeath_caseindex>ttinfection
(12,311 real changes made)

. replace died_366_730_crossover = 0 if
(indextodeath_caseindex>ttstudyend) & (inrange(indextodeath_caseindex,
366, 730)) ///
>
& (inrange(ttstudyend, 366, 730))
(10,385 real changes made)

.
. tab died_366_730 died_366_730_crossover, m //missing represents those
who were censored in period 1-3
```

| died_366_730_crossover | died_366_730_crossover |   |   | Total |
|------------------------|------------------------|---|---|-------|
|                        | 0                      | 1 | . |       |
| 0                      |                        |   |   |       |
| 1                      |                        |   |   |       |
| .                      |                        |   |   |       |
| Total                  |                        |   |   |       |

|       | 0         | 1      | .      | Total     |
|-------|-----------|--------|--------|-----------|
| 0     | 1,162,593 | 0      | 0      | 1,162,593 |
| 1     | 4,169     | 16,419 | 0      | 20,588    |
| .     | 6,211     | 0      | 56,092 | 62,303    |
| Total | 1,172,973 | 16,419 | 56,092 | 1,245,484 |

. tab died\_366\_730\_crossover case, m

| died_366_730_crossover | indicator: is<br>`index_dt` the date<br>of the first positive<br>covid-19 test result<br>for | 0         | 1       | Total     |
|------------------------|----------------------------------------------------------------------------------------------|-----------|---------|-----------|
| 0                      |                                                                                              | 985,394   | 187,579 | 1,172,973 |
| 1                      |                                                                                              | 13,837    | 2,582   | 16,419    |
| .                      |                                                                                              | 38,192    | 17,900  | 56,092    |
| Total                  |                                                                                              | 1,037,423 | 208,061 | 1,245,484 |

. tab died\_366\_730 died\_366\_730\_crossover if case==1

| died_366_730 | died_366_730_crossover | 0       | 1     | Total   |
|--------------|------------------------|---------|-------|---------|
| 0            |                        | 187,579 | 0     | 187,579 |
| 1            |                        | 0       | 2,582 | 2,582   |
| Total        |                        | 187,579 | 2,582 | 190,161 |

. tab died\_366\_730 died\_366\_730\_crossover if case==0

| died_366_730 | died_366_730_crossover | 0       | 1      | Total   |
|--------------|------------------------|---------|--------|---------|
| 0            |                        | 975,014 | 0      | 975,014 |
| 1            |                        | 4,169   | 13,837 | 18,006  |
| Total        |                        | 979,183 | 13,837 | 993,020 |

```

. *-----
. * for each period, identify whether patient is alive on the first day
of the
. * period AND was not an infection crossover in the prior period(s)
. *-----

```

```

. * Alive on day 91 & no crossover in prior period
. gen alive_day91_crossover = .
(1,245,484 missing values generated)

. replace alive_day91_crossover = 1 if indextodeath_caseindex>=91
(1,221,670 real changes made)

. replace alive_day91_crossover = 0 if inrange(indextodeath_caseindex,
0, 90)
(23,814 real changes made)

. replace alive_day91_crossover = 0 if inrange(ttinfection, 0, 90)
(15,756 real changes made)

. replace alive_day91_crossover = 0 if ttstudyend<91
(0 real changes made)

```

```

.
. sum ttinfection if inrange(ttinfection, 0, 90)

```

| Variable    | Obs    | Mean     | Std. dev. | Min | Max |
|-------------|--------|----------|-----------|-----|-----|
| ttinfection | 17,044 | 46.16592 | 22.62754  | 0   | 90  |

```

. tab alive_day91 alive_day91_crossover, m

```

| alive_day9 | alive_day91_crossover |           | Total     |
|------------|-----------------------|-----------|-----------|
| 1          | 0                     | 1         |           |
| 0          | 23,814                | 0         | 23,814    |
| 1          | 15,756                | 1,205,914 | 1,221,670 |
| Total      | 39,570                | 1,205,914 | 1,245,484 |

```

. tab alive_day91_crossover died_91_180_crossover

```

| alive_day9 | died_91_180_crossover |        | Total     |
|------------|-----------------------|--------|-----------|
| 1          | 0                     | 1      |           |
| 0          | 16,913                | 0      | 16,913    |
| 1          | 1,194,822             | 11,092 | 1,205,914 |
| Total      | 1,211,735             | 11,092 | 1,222,827 |

```

. tab alive_day91 alive_day91_crossover if case==1

```

| alive_day9 | alive_day91_crossover |         | Total   |
|------------|-----------------------|---------|---------|
| 1          | 0                     | 1       |         |
| 0          | 12,415                | 0       | 12,415  |
| 1          | 0                     | 195,646 | 195,646 |
| Total      | 12,415                | 195,646 | 208,061 |

```
. tab alive_day91 alive_day91_crossover if case==0
```

| alive_day91 | alive_day91_crossover | Total     |
|-------------|-----------------------|-----------|
| 0           | 11,399                | 11,399    |
| 1           | 15,756 1,010,268      | 1,026,024 |
| Total       | 27,155 1,010,268      | 1,037,423 |

```
. tab alive_day91_crossover died_0_90_crossover, m
```

| alive_day91_crossover | died_0_90_crossover | Total     |
|-----------------------|---------------------|-----------|
| 0                     | 16,913 22,657       | 39,570    |
| 1                     | 1,205,914           | 1,205,914 |
| Total                 | 1,222,827 22,657    | 1,245,484 |

```
. sum ttinfection if ttinfection<91 //17044 crossover infections prior to day 91
```

| Variable    | Obs    | Mean     | Std. dev. | Min | Max |
|-------------|--------|----------|-----------|-----|-----|
| ttinfection | 17,044 | 46.16592 | 22.62754  | 0   | 90  |

```
. * Alive on day 181 & no crossover in prior periods
```

```
. gen alive_day181_crossover = .  
(1,245,484 missing values generated)
```

```
. replace alive_day181_crossover = 1 if indextodeath_caseindex>=181  
(1,209,311 real changes made)
```

```
. replace alive_day181_crossover = 0 if inrange(indextodeath_caseindex,  
0, 180)  
(36,173 real changes made)
```

```
. replace alive_day181_crossover = 0 if inrange(ttinfection, 0, 180)  
(27,222 real changes made)
```

```
. replace alive_day181_crossover = 0 if ttstudyend<181  
(0 real changes made)
```

```
. sum ttinfection if inrange(ttinfection, 0, 180)
```

| Variable    | Obs    | Mean     | Std. dev. | Min | Max |
|-------------|--------|----------|-----------|-----|-----|
| ttinfection | 29,870 | 84.65018 | 50.53237  | 0   | 180 |



```
. tab alive_day181 alive_day181_crossover, m
```

| alive_day181 | alive_day181_crossover |           | Total     |
|--------------|------------------------|-----------|-----------|
|              | 0                      | 1         |           |
| 0            | 36,173                 | 0         | 36,173    |
| 1            | 27,222                 | 1,182,089 | 1,209,311 |
| Total        | 63,395                 | 1,182,089 | 1,245,484 |

```
. tab alive_day181 alive_day181_crossover if case==1
```

| alive_day181 | alive_day181_crossover |         | Total   |
|--------------|------------------------|---------|---------|
|              | 0                      | 1       |         |
| 0            | 14,459                 | 0       | 14,459  |
| 1            | 0                      | 193,602 | 193,602 |
| Total        | 14,459                 | 193,602 | 208,061 |

```
. tab alive_day181 alive_day181_crossover if case==0
```

| alive_day181 | alive_day181_crossover |         | Total     |
|--------------|------------------------|---------|-----------|
|              | 0                      | 1       |           |
| 0            | 21,714                 | 0       | 21,714    |
| 1            | 27,222                 | 988,487 | 1,015,709 |
| Total        | 48,936                 | 988,487 | 1,037,423 |

```
. tab alive_day181_crossover died_91_180_crossover
```

| alive_day181_crossover | died_91_180_crossover |        | Total     |
|------------------------|-----------------------|--------|-----------|
|                        | 0                     | 1      |           |
| 0                      | 29,646                | 11,092 | 40,738    |
| 1                      | 1,182,089             | 0      | 1,182,089 |
| Total                  | 1,211,735             | 11,092 | 1,222,827 |

```
. sum ttinfection if ttinfection<181 //29,870 crossover infections prior to day 181
```

| Variable    | Obs    | Mean     | Std. dev. | Min | Max |
|-------------|--------|----------|-----------|-----|-----|
| ttinfection | 29,870 | 84.65018 | 50.53237  | 0   | 180 |

```
. tab died_181_365_crossover case if alive_day181_crossover
```

```
| indicator: is
```

| died_181_3   | `index_dt` the date<br>of the first positive<br>covid-19 test result |         |           |
|--------------|----------------------------------------------------------------------|---------|-----------|
| 65_crossover | 0                                                                    | 1       | Total     |
| 0            | 969,635                                                              | 190,170 | 1,159,805 |
| 1            | 18,852                                                               | 3,432   | 22,284    |
| Total        | 988,487                                                              | 193,602 | 1,182,089 |

```
.
. * Alive on day 366 & no crossover in prior periods
. gen alive_day366_crossover = .
(1,245,484 missing values generated)

. replace alive_day366_crossover = 1 if indextodeath_caseindex>=366
(1,183,181 real changes made)

. replace alive_day366_crossover = 0 if inrange(indextodeath_caseindex,
0, 365)
(62,303 real changes made)

. replace alive_day366_crossover = 0 if inrange(ttinfection, 0, 365)
(65,576 real changes made)

. replace alive_day366_crossover = 0 if ttstudyend<366
(48,497 real changes made)
```

```
.
. sum ttinfection if inrange(ttinfection, 0, 365)
```

| Variable    | Obs    | Mean     | Std. dev. | Min | Max |
|-------------|--------|----------|-----------|-----|-----|
| ttinfection | 72,253 | 201.5884 | 111.1569  | 0   | 365 |

```
. tab alive_day366 alive_day366_crossover
```

| alive_day366 | alive_day366_crossover |           |           |
|--------------|------------------------|-----------|-----------|
|              | 0                      | 1         | Total     |
| 0            | 114,374                | 0         | 114,374   |
| 1            | 62,002                 | 1,069,108 | 1,131,110 |
| Total        | 176,376                | 1,069,108 | 1,245,484 |

```
. tab alive_day366 alive_day366_crossover if case==1
```

| alive_day366 | alive_day366_crossover |   |        |
|--------------|------------------------|---|--------|
|              | 0                      | 1 | Total  |
| 0            | 26,404                 | 0 | 26,404 |

|        |        |         |         |
|--------|--------|---------|---------|
| 1      | 0      | 181,657 | 181,657 |
| -----+ |        |         |         |
| Total  | 26,404 | 181,657 | 208,061 |

. tab alive\_day366 alive\_day366\_crossover if case==0

|              |                       |         |           |
|--------------|-----------------------|---------|-----------|
|              | alive_day366_crossove |         |           |
| alive_day366 | r                     |         |           |
|              | 0                     | 1       | Total     |
| -----+       |                       |         |           |
| 0            | 87,970                | 0       | 87,970    |
| 1            | 62,002                | 887,451 | 949,453   |
| -----+       |                       |         |           |
| Total        | 149,972               | 887,451 | 1,037,423 |

. tab alive\_day366\_crossover died\_181\_365\_crossover

|                      |                       |        |           |
|----------------------|-----------------------|--------|-----------|
|                      | died_181_365_crossove |        |           |
| alive_day366_crossov | er                    |        |           |
|                      | 0                     | 1      | Total     |
| -----+               |                       |        |           |
| 0                    | 120,343               | 22,284 | 142,627   |
| 1                    | 1,069,108             | 0      | 1,069,108 |
| -----+               |                       |        |           |
| Total                | 1,189,451             | 22,284 | 1,211,735 |

. sum ttinfection if ttinfection<366 //72253 crossover infections prior to day 181

| Variable    | Obs    | Mean     | Std. dev. | Min | Max |
|-------------|--------|----------|-----------|-----|-----|
| ttinfection | 72,253 | 201.5884 | 111.1569  | 0   | 365 |

. tab died\_366\_730\_crossover case if alive\_day366\_crossover

|                      |                       |         |           |
|----------------------|-----------------------|---------|-----------|
|                      | indicator: is         |         |           |
|                      | `index_dt` the date   |         |           |
|                      | of the first positive |         |           |
| died_366_730_crossov | er                    |         |           |
|                      | 0                     | 1       | Total     |
| -----+               |                       |         |           |
| 0                    | 873,923               | 179,139 | 1,053,062 |
| 1                    | 13,528                | 2,518   | 16,046    |
| -----+               |                       |         |           |
| Total                | 887,451               | 181,657 | 1,069,108 |

. \* check mortality by period prior to applying below criteria  
. tab died\_0\_90\_crossover case, co

```
+-----+
| Key      |
+-----+
```

```

| frequency |
| column percentage |
+-----+

```

```

| indicator: is
| `index_dt` the date
| of the first positive
| covid-19 test result
died_0_90_ | for
crossover | 0 1 | Total
-----+-----+-----
0 | 1,027,181 195,646 | 1,222,827
| 99.01 94.03 | 98.18
-----+-----+-----
1 | 10,242 12,415 | 22,657
| 0.99 5.97 | 1.82
-----+-----+-----
Total | 1,037,423 208,061 | 1,245,484
| 100.00 100.00 | 100.00

```

```

. tab died_91_180_crossover case, co

```

```

+-----+
| Key |
|-----|
| frequency |
| column percentage |
+-----+

```

```

| indicator: is
| `index_dt` the date
| of the first positive
died_91_18 | covid-19 test result
0_crossov | for
e r | 0 1 | Total
-----+-----+-----
0 | 1,018,133 193,602 | 1,211,735
| 99.12 98.96 | 99.09
-----+-----+-----
1 | 9,048 2,044 | 11,092
| 0.88 1.04 | 0.91
-----+-----+-----
Total | 1,027,181 195,646 | 1,222,827
| 100.00 100.00 | 100.00

```

```

. tab died_181_365_crossover case, co

```

```

+-----+
| Key |
|-----|
| frequency |
| column percentage |
+-----+

```

|            | indicator: is         |         |           |
|------------|-----------------------|---------|-----------|
|            | `index_dt` the date   |         |           |
|            | of the first positive |         |           |
| died_181_3 | covid-19 test result  |         |           |
| 65_crossov | for                   |         |           |
| er         | 0                     | 1       | Total     |
| 0          | 999,281               | 190,170 | 1,189,451 |
|            | 98.15                 | 98.23   | 98.16     |
| 1          | 18,852                | 3,432   | 22,284    |
|            | 1.85                  | 1.77    | 1.84      |
| Total      | 1,018,133             | 193,602 | 1,211,735 |
|            | 100.00                | 100.00  | 100.00    |

. tab died\_366\_730\_crossover case, co

```
+-----+
| Key          |
|-----|
| frequency    |
| column percentage |
+-----+
```

|            | indicator: is         |         |           |
|------------|-----------------------|---------|-----------|
|            | `index_dt` the date   |         |           |
|            | of the first positive |         |           |
| died_366_7 | covid-19 test result  |         |           |
| 30_crossov | for                   |         |           |
| er         | 0                     | 1       | Total     |
| 0          | 985,394               | 187,579 | 1,172,973 |
|            | 98.62                 | 98.64   | 98.62     |
| 1          | 13,837                | 2,582   | 16,419    |
|            | 1.38                  | 1.36    | 1.38      |
| Total      | 999,231               | 190,161 | 1,189,392 |
|            | 100.00                | 100.00  | 100.00    |

```
.
. *-----
. *-----
. * for each period, identify whether the case and at least one
. * comparator
. * in a matched group are alive on the first day of the period & were
. * not
. * an infection crossover in the prior period
. *-----
.
. * drop previous versions of variable
.
```

```

. foreach i of numlist 91 181 366 {
2.         drop alive_day`i' _casecontrol
3. }

.
. foreach i of numlist 91 181 366 {
2.
.         //cases
.         gen alive_day`i' _case = 0
3.         replace alive_day`i' _case = 1 if case==1 &
alive_day`i' _crossover==1
4.         replace alive_day`i' _case = 0 if case==1 & ttstudyend<`i'
5.         tab alive_day`i' _case alive_day`i' _crossover if case==1
6.         sum indextodeath if indextodeath<`i' & case==1
7.
.         bysort matchgroupnumber: egen alive_day`i' _case_grp =
max(alive_day`i' _case)
8.
.         //comparators
.         gen alive_day`i' _control = 0
9.         replace alive_day`i' _control = 1 if case==0 &
alive_day`i' _crossover==1
10.        replace alive_day`i' _control = 0 if case==0 &
ttstudyend<`i'
11.
.         tab alive_day`i' _control alive_day`i' _crossover if case==0
12.        sum indextodeath if indextodeath<`i' & case==0
13.
.         bysort matchgroupnumber: egen alive_day`i' _control_num =
sum(alive_day`i' _control)
14.
.         //case and at least one comparator alive on day`i'
.         gen alive_day`i' _crosscasecontrol = 0
15.        replace alive_day`i' _crosscasecontrol = 1 if
alive_day`i' _case_grp==1 & alive_day`i' _control_num>=1
16.
.         tab alive_day`i' _crosscasecontrol case
17. }
(195,646 real changes made)
(0 real changes made)

```

| alive_day9<br>1_case | alive_day91_crossover<br>0 | 1       | Total   |
|----------------------|----------------------------|---------|---------|
| 0                    | 12,415                     | 0       | 12,415  |
| 1                    | 0                          | 195,646 | 195,646 |
| Total                | 12,415                     | 195,646 | 208,061 |

| Variable     | Obs    | Mean     | Std. dev. | Min | Max |
|--------------|--------|----------|-----------|-----|-----|
| indextodea~x | 12,415 | 22.35747 | 19.79229  | 0   | 90  |

(1,010,268 real changes made)  
(0 real changes made)

| alive_day9 | 1_control | alive_day91_crossover | Total     |
|------------|-----------|-----------------------|-----------|
| 0          | 27,155    | 0                     | 27,155    |
| 1          | 0         | 1,010,268             | 1,010,268 |
| Total      | 27,155    | 1,010,268             | 1,037,423 |

| Variable                                      | Obs    | Mean   | Std. dev. | Min | Max |
|-----------------------------------------------|--------|--------|-----------|-----|-----|
| indextodea~x<br>(1,171,103 real changes made) | 11,399 | 44.554 | 25.89809  | 0   | 90  |

indicator: is  
`index\_dt` the date  
of the first positive  
covid-19 test result

| alive_day9 | 1_crosscas | econtrol | 0         | 1 | Total |
|------------|------------|----------|-----------|---|-------|
| 0          | 61,943     | 12,438   | 74,381    |   |       |
| 1          | 975,480    | 195,623  | 1,171,103 |   |       |
| Total      | 1,037,423  | 208,061  | 1,245,484 |   |       |

(193,602 real changes made)  
(0 real changes made)

| alive_day1 | 81_case | 0       | 1       | Total |
|------------|---------|---------|---------|-------|
| 0          | 14,459  | 0       | 14,459  |       |
| 1          | 0       | 193,602 | 193,602 |       |
| Total      | 14,459  | 193,602 | 208,061 |       |

| Variable                                                             | Obs    | Mean     | Std. dev. | Min | Max |
|----------------------------------------------------------------------|--------|----------|-----------|-----|-----|
| indextodea~x<br>(988,487 real changes made)<br>(0 real changes made) | 14,459 | 38.05222 | 43.91964  | 0   | 180 |

| alive_day1 | 81_control | 0       | 1         | Total |
|------------|------------|---------|-----------|-------|
| 0          | 48,936     | 0       | 48,936    |       |
| 1          | 0          | 988,487 | 988,487   |       |
| Total      | 48,936     | 988,487 | 1,037,423 |       |

| Variable | Obs | Mean | Std. dev. | Min | Max |
|----------|-----|------|-----------|-----|-----|
|----------|-----|------|-----------|-----|-----|

indextodea~x | 21,714 87.84411 52.42273 0 180  
 (1,158,838 real changes made)

```

      | indicator: is
      | `index_dt` the date
      | of the first positive
alive_day1 | covid-19 test result
81_crossca | for
secontrol  | 0 1 | Total
-----+-----+-----
0 | 72,147 14,499 | 86,646
1 | 965,276 193,562 | 1,158,838
-----+-----+-----
Total | 1,037,423 208,061 | 1,245,484
(181,657 real changes made)
(0 real changes made)

```

```

      | alive_day366_crossove
alive_day3 | r
66_case    | 0 1 | Total
-----+-----+-----
0 | 26,404 0 | 26,404
1 | 0 181,657 | 181,657
-----+-----+-----
Total | 26,404 181,657 | 208,061

```

| Variable     | Obs    | Mean     | Std. dev. | Min | Max |
|--------------|--------|----------|-----------|-----|-----|
| indextodea~x | 17,900 | 83.07486 | 103.0125  | 0   | 365 |

(887,451 real changes made)  
 (0 real changes made)

```

      | alive_day366_crossove
alive_day3 | r
66_control | 0 1 | Total
-----+-----+-----
0 | 149,972 0 | 149,972
1 | 0 887,451 | 887,451
-----+-----+-----
Total | 149,972 887,451 | 1,037,423

```

| Variable     | Obs    | Mean  | Std. dev. | Min | Max |
|--------------|--------|-------|-----------|-----|-----|
| indextodea~x | 44,403 | 182.9 | 106.9272  | 0   | 365 |

(1,087,393 real changes made)

```

      | indicator: is
      | `index_dt` the date
      | of the first positive
alive_day3 | covid-19 test result
66_crossca | for
secontrol  | 0 1 | Total
-----+-----+-----
0 | 131,633 26,458 | 158,091

```



```

          1 |    905,790    181,603 | 1,087,393
-----+-----+-----
      Total | 1,037,423    208,061 | 1,245,484

```

```

.
. * drop variables we no longer need
.
. foreach i of numlist 91 181 366 {
. 2.          drop alive_day`i'_case alive_day`i'_case_grp
alive_day`i'_control alive_day`i'_control_num
. 3. }

```

```

.
. *-----
. * Create categories for PP1 subgroup analyses
. *-----
.
. * Note: all categories are in relation to the original infected case *
.
. ** age categories **
.
. * <65
. sum ageatindexdate

```

```

      Variable |          Obs          Mean      Std. dev.        Min        Max
-----+-----+-----
ageatindexdate | 1,245,484    60.47358    16.41887    18.88493    99.99726

```

```

.
. gen mkg_age_less65_case = 0
. replace mkg_age_less65=1 if case==1 & ageatindexdate<65
(115,041 real changes made)
.
. bysort matchgroupnumber (patienticn): egen age_less65_case =
max(mkg_age_less65_case)

```

```

. tab age_less65_case

```

```

age_less65_ |
  case |          Freq.          Percent          Cum.
-----+-----+-----
          0 |    557,143          44.73          44.73
          1 |    688,341          55.27         100.00
-----+-----+-----
      Total | 1,245,484         100.00

```

```

.
. drop mkg_age_less65_case
.
. * 65-85
. gen mkg_age_65to85_case = 0

```

```
. replace mkg_age_65to85_case=1 if case==1 & inrange(ageatindexdate, 65, 85)
(82,301 real changes made)
```

```
. bysort matchgroupnumber (patienticn): egen age_65to85_case = max(mkg_age_65to85_case)
```

```
. tab age_65to85_case
```

| age_65to85_ case | Freq.     | Percent | Cum.   |
|------------------|-----------|---------|--------|
| 0                | 752,514   | 60.42   | 60.42  |
| 1                | 492,970   | 39.58   | 100.00 |
| Total            | 1,245,484 | 100.00  |        |

```
. drop mkg_age_65to85_case
```

```
. * >85
. gen mkg_age_more85_case = 0
```

```
. replace mkg_age_more85_case=1 if case==1 & ageatindexdate>85
(10,719 real changes made)
```

```
. bysort matchgroupnumber (patienticn): egen age_more85_case = max(mkg_age_more85_case)
```

```
. tab age_more85_case
```

| age_more85_ case | Freq.     | Percent | Cum.   |
|------------------|-----------|---------|--------|
| 0                | 1,181,311 | 94.85   | 94.85  |
| 1                | 64,173    | 5.15    | 100.00 |
| Total            | 1,245,484 | 100.00  |        |

```
. drop mkg_age_more85_case
```

```
. ** Tertiles of Gagne scores **
. sum gagne if case==1, de
```

gagne score (min=-2, max=24)

```
-----
Percentiles      Smallest
```

```

1%      -1      -2
5%      -1      -2
10%     -1      -2      Obs      208,061
25%      0      -2      Sum of wgt. 208,061

50%      1
          Largest      Mean      1.440803
          Std. dev.    2.341555
75%      2      19
90%      4      20      Variance    5.482881
95%      6      20      Skewness   1.971733
99%     10      20      Kurtosis   8.011107

```

```
. xtile mkg_gagne_tertile = gagne if case==1, nq(3)
```

```
. bysort mkg_gagne_tertile: sum gagne
```

```
-----
-----
-----
-> mkg_gagne_tertile = 1
```

```

Variable |      Obs      Mean      Std. dev.      Min      Max
-----+-----
gagne |    93,002   -.2447689   .4331417      -2       0

```

```
-----
-----
-----
-> mkg_gagne_tertile = 2
```

```

Variable |      Obs      Mean      Std. dev.      Min      Max
-----+-----
gagne |    70,162    1.358656   .4796093       1       2

```

```
-----
-----
-----
-> mkg_gagne_tertile = 3
```

```

Variable |      Obs      Mean      Std. dev.      Min      Max
-----+-----
gagne |    44,897    5.060761   2.379211       3      20

```

```
-----
-----
-----
-> mkg_gagne_tertile = .
```

```

Variable |      Obs      Mean      Std. dev.      Min      Max
-----+-----
gagne | 1,037,423    1.402901   2.238274      -2      22

```

```
.
. bysort matchgroupnumber (patienticn): egen gagne_tertile_case =
max(mkg_gagne_tertile)
```

```
. sum gagne_tertile_case
```

| Variable      | Obs       | Mean     | Std. dev. | Min | Max |
|---------------|-----------|----------|-----------|-----|-----|
| gagne_tertile | 1,245,484 | 1.769205 | .7805706  | 1   | 3   |

```
. ** Probabilities of death in first 90 days **
```

```
. * fit logistic regression model for comparator deaths during first 90
days
```

```
. local covar ageatindexdate bmi i.sex3cat i.race7cat i.ethnicity3cat
///
> i.rurality2cat i.smoking4cat gagne numipadmits
util_numpcstops ///
> util_numscstops util_nummhstops i.immuno
i.clcatindexdate ///
> i.nosos11cat i.canscore7cat
neareststa3ndistance
```

```
. logit died_0_90 `covar' if case==0
```

```
Iteration 0: log likelihood = -62756.685
Iteration 1: log likelihood = -55368.077
Iteration 2: log likelihood = -52670.45
Iteration 3: log likelihood = -52494.908
Iteration 4: log likelihood = -52491.217
Iteration 5: log likelihood = -52491.201
Iteration 6: log likelihood = -52491.201
```

|                             |                 |
|-----------------------------|-----------------|
| Logistic regression         | Number of obs = |
| 1,037,423                   |                 |
|                             | LR chi2(40) =   |
| 20530.97                    |                 |
|                             | Prob > chi2 =   |
| 0.0000                      |                 |
| Log likelihood = -52491.201 | Pseudo R2 =     |
| 0.1636                      |                 |

```
-----+-----
          died_0_90 | Coefficient  Std. err.      z    P>|z|
[95% conf. interval]
-----+-----
          ageatindexdate |   .0501644   .0010291   48.75   0.000
.0481474   .0521813
          bmi |  -.0216606   .0016231  -13.35   0.000
-.0248418  -.0184793
```

|           |           |                              |           |          |        |       |  |
|-----------|-----------|------------------------------|-----------|----------|--------|-------|--|
|           |           | sex3cat                      |           |          |        |       |  |
|           |           | Male                         | .4578403  | .0621326 | 7.37   | 0.000 |  |
| .3360626  | .579618   |                              |           |          |        |       |  |
|           |           | Unknown                      | .7157964  | .1086869 | 6.59   | 0.000 |  |
| .502774   | .9288188  |                              |           |          |        |       |  |
|           |           | race7cat                     |           |          |        |       |  |
|           |           | Asian                        | -.3956703 | .1705535 | -2.32  | 0.020 |  |
| -.729949  | -.0613915 |                              |           |          |        |       |  |
|           |           | Black/AfricanAmer            | -.3923309 | .0998636 | -3.93  | 0.000 |  |
| -.58806   | -.1966019 |                              |           |          |        |       |  |
|           |           | NativeHawaiian/PacificIsland | -.1711533 | .1416686 | -1.21  | 0.227 |  |
| -.4488187 | .106512   |                              |           |          |        |       |  |
|           |           | White                        | -.2352478 | .0975313 | -2.41  | 0.016 |  |
| -.4264057 | -.0440899 |                              |           |          |        |       |  |
|           |           | MultipleRace                 | -.3396909 | .1526475 | -2.23  | 0.026 |  |
| -.6388744 | -.0405073 |                              |           |          |        |       |  |
|           |           | Missing                      | -.2915382 | .1102476 | -2.64  | 0.008 |  |
| -.5076195 | -.075457  |                              |           |          |        |       |  |
|           |           | ethnicity3cat                |           |          |        |       |  |
|           |           | NotHispanic                  | .0024398  | .0417852 | 0.06   | 0.953 |  |
| -.0794577 | .0843372  |                              |           |          |        |       |  |
|           |           | Missing                      | .0287298  | .0693445 | 0.41   | 0.679 |  |
| -.107183  | .1646426  |                              |           |          |        |       |  |
|           |           | rurality2cat                 |           |          |        |       |  |
|           |           | Urban                        | -.014362  | .0233265 | -0.62  | 0.538 |  |
| -.0600811 | .0313572  |                              |           |          |        |       |  |
|           |           | smoking4cat                  |           |          |        |       |  |
|           |           | Former                       | -.1434746 | .0317828 | -4.51  | 0.000 |  |
| -.2057677 | -.0811814 |                              |           |          |        |       |  |
|           |           | Never                        | -.2075364 | .033906  | -6.12  | 0.000 |  |
| -.273991  | -.1410818 |                              |           |          |        |       |  |
|           |           | Missing                      | .3945889  | .0502605 | 7.85   | 0.000 |  |
| .2960801  | .4930977  |                              |           |          |        |       |  |
|           |           | gagne                        | .1579537  | .0040056 | 39.43  | 0.000 |  |
| .1501028  | .1658046  |                              |           |          |        |       |  |
|           |           | numipadmits                  | -.0024634 | .005221  | -0.47  | 0.637 |  |
| -.0126963 | .0077696  |                              |           |          |        |       |  |
|           |           | util_numpcstops              | .007242   | .0009396 | 7.71   | 0.000 |  |
| .0054003  | .0090836  |                              |           |          |        |       |  |
|           |           | util_numscstops              | -.0113454 | .0008449 | -13.43 | 0.000 |  |
| -.0130013 | -.0096896 |                              |           |          |        |       |  |
|           |           | util_nummhstops              | -.0032296 | .0005546 | -5.82  | 0.000 |  |
| -.0043166 | -.0021426 |                              |           |          |        |       |  |
|           |           | 1.immuno                     | .1424113  | .0268694 | 5.30   | 0.000 |  |
| .0897482  | .1950744  |                              |           |          |        |       |  |
|           |           | 1.clcatindexdate             | .1860423  | .0523672 | 3.55   | 0.000 |  |
| .0834044  | .2886801  |                              |           |          |        |       |  |

|           |           | nosos11cat           |  |           |          |              |
|-----------|-----------|----------------------|--|-----------|----------|--------------|
| -.5282385 | -.1239708 | 2                    |  | -.3261046 | .1031314 | -3.16 0.002  |
| -.2308791 | .1344648  | 3                    |  | -.0482072 | .0932017 | -0.52 0.605  |
| -.3777856 | -.0207981 | 4                    |  | -.1992918 | .0910699 | -2.19 0.029  |
| -.4894611 | -.1389471 | 5                    |  | -.3142041 | .0894185 | -3.51 0.000  |
| -.5939213 | -.2493982 | 6                    |  | -.4216598 | .0878902 | -4.80 0.000  |
| -.7054595 | -.3647472 | 7                    |  | -.5351033 | .086918  | -6.16 0.000  |
| -.6749556 | -.3401927 | 8                    |  | -.5075741 | .0854003 | -5.94 0.000  |
| -.7229317 | -.3902367 | 9                    |  | -.5565842 | .0848727 | -6.56 0.000  |
| -.5656438 | -.2320665 | 10                   |  | -.3988552 | .0850978 | -4.69 0.000  |
| -.2304936 | .2293431  | 99                   |  | -.0005753 | .1173074 | -0.00 0.996  |
|           |           |                      |  |           |          |              |
|           |           | canscore7cat         |  |           |          |              |
| .5614362  | .9418876  | 2                    |  | .7516619  | .0970557 | 7.74 0.000   |
| 1.071869  | 1.428069  | 3                    |  | 1.249969  | .0908691 | 13.76 0.000  |
| 1.49428   | 1.845921  | 4                    |  | 1.6701    | .0897059 | 18.62 0.000  |
| 1.876066  | 2.237067  | 5                    |  | 2.056566  | .0920936 | 22.33 0.000  |
| 2.201554  | 2.576329  | 6                    |  | 2.388942  | .0956076 | 24.99 0.000  |
| 1.36115   | 1.832309  | 99                   |  | 1.596729  | .1201958 | 13.28 0.000  |
|           |           |                      |  |           |          |              |
| .0018912  | .0030393  | neareststa3ndistance |  | .0024652  | .0002929 | 8.42 0.000   |
| -9.376103 | -8.662418 | _cons                |  | -9.01926  | .1820659 | -49.54 0.000 |

-----  
 . lroc, nograph //0.846

Logistic model for died\_0\_90

Number of observations = 1037423

Area under ROC curve = 0.8459

. predict mkg\_pr\_died0\_90  
 (option pr assumed; Pr(died\_0\_90))

. gen mkg\_pr\_died0\_90\_case = mkg\_pr\_died0\_90 if case==1

(1,037,423 missing values generated)

```
.  
. bysort matchgroupnumber (patienticn): egen pr_died0_90_case =  
max(mkg_pr_died0_90_case)  
  
. * create tertiles of predicted probabilities of death in first 90 days  
. xtile pr_died0_90_tertile = pr_died0_90_case, nq(3)  
  
. tab pr_died0_90_tertile
```

```
3 quantiles |  
      of |  
pr_died0_90 |  
  _case |  
-----+-----  
      1 |    415,167    33.33    33.33  
      2 |    415,160    33.33    66.67  
      3 |    415,157    33.33   100.00  
-----+-----  
Total | 1,245,484   100.00
```

```
.  
. bysort pr_died0_90_tertile: sum pr_died0_90_case
```

```
-----  
-----  
-----  
-> pr_died0_90_tertile = 1
```

```
Variable |      Obs      Mean  Std. dev.      Min      Max  
-----+-----  
pr_died0_~se |    415,167    .0008415    .0004402    .0000576    .0017813
```

```
-----  
-----  
-----  
-> pr_died0_90_tertile = 2
```

```
Variable |      Obs      Mean  Std. dev.      Min      Max  
-----+-----  
pr_died0_~se |    415,160    .0042522    .0018158    .0017814    .0081787
```

```
-----  
-----  
-----  
-> pr_died0_90_tertile = 3
```

```
Variable |      Obs      Mean  Std. dev.      Min      Max  
-----+-----  
pr_died0_~se |    415,157    .0306809    .0323484    .0081789    .5654742
```

```

.
.
. ** Probabilities of death in days 181-730 **
.
. * died in days 181-730
. gen died_181_730 = !missing(best_death_date)

. replace died_181_730 = 0 if indextodeath_caseindex<181 |
indextodeath_caseindex>730
(37,561 real changes made)

.
. * fit logistic regression model for comparator deaths during 181-730
days
. local covar ageatindexdate bmi i.sex3cat i.race7cat i.ethnicity3cat
///
> i.rurality2cat i.smoking4cat gagne numipadmits
util_numpcstops ///
> util_numscstops util_nummhstops i.immuno
i.clcatindexdate ///
> i.nosos11cat i.canscore7cat
neareststa3ndistance

.
. logit died_181_730 `covar' if case==0

```

```

Iteration 0:    log likelihood = -204114.37
Iteration 1:    log likelihood = -191425.15
Iteration 2:    log likelihood = -166974.46
Iteration 3:    log likelihood = -166176.34
Iteration 4:    log likelihood = -166166.2
Iteration 5:    log likelihood = -166166.17
Iteration 6:    log likelihood = -166166.17

```

```

Logistic regression                                Number of obs =
1,037,423                                          LR chi2(40) =
75896.39                                          Prob > chi2 =
0.0000                                           Pseudo R2 =
Log likelihood = -166166.17
0.1859

```

```

-----
-----
                died_181_730 | Coefficient   Std. err.      z    P>|z|
[95% conf. interval]
-----+-----
-----
                ageatindexdate |   .0577912   .0005167   111.84   0.000
.0567784   .058804
                bmi |  -.0113613   .0007813   -14.54   0.000
-.0128925   -.00983
                |

```



|           |           |                              |  |           |          |        |       |  |  |
|-----------|-----------|------------------------------|--|-----------|----------|--------|-------|--|--|
|           |           | sex3cat                      |  |           |          |        |       |  |  |
|           |           | Male                         |  | .4820631  | .0289214 | 16.67  | 0.000 |  |  |
| .4253782  | .538748   |                              |  |           |          |        |       |  |  |
|           |           | Unknown                      |  | .6188037  | .0536677 | 11.53  | 0.000 |  |  |
| .513617   | .7239904  |                              |  |           |          |        |       |  |  |
|           |           | race7cat                     |  |           |          |        |       |  |  |
|           |           | Asian                        |  | -.5767519 | .0905526 | -6.37  | 0.000 |  |  |
| -.7542318 | -.399272  |                              |  |           |          |        |       |  |  |
|           |           | Black/AfricanAmer            |  | -.3593859 | .0514899 | -6.98  | 0.000 |  |  |
| -.4603043 | -.2584675 |                              |  |           |          |        |       |  |  |
|           |           | NativeHawaiian/PacificIsland |  | -.1970492 | .0733454 | -2.69  | 0.007 |  |  |
| -.3408036 | -.0532948 |                              |  |           |          |        |       |  |  |
|           |           | White                        |  | -.1911021 | .0503895 | -3.79  | 0.000 |  |  |
| -.2898638 | -.0923404 |                              |  |           |          |        |       |  |  |
|           |           | MultipleRace                 |  | -.1773534 | .0748844 | -2.37  | 0.018 |  |  |
| -.3241243 | -.0305826 |                              |  |           |          |        |       |  |  |
|           |           | Missing                      |  | -.1394429 | .0562494 | -2.48  | 0.013 |  |  |
| -.2496898 | -.0291961 |                              |  |           |          |        |       |  |  |
|           |           | ethnicity3cat                |  |           |          |        |       |  |  |
|           |           | NotHispanic                  |  | .1783973  | .0216559 | 8.24   | 0.000 |  |  |
| .1359525  | .2208421  |                              |  |           |          |        |       |  |  |
|           |           | Missing                      |  | .1477052  | .0350344 | 4.22   | 0.000 |  |  |
| .079039   | .2163714  |                              |  |           |          |        |       |  |  |
|           |           | rurality2cat                 |  |           |          |        |       |  |  |
|           |           | Urban                        |  | .0058641  | .0115908 | 0.51   | 0.613 |  |  |
| -.0168534 | .0285816  |                              |  |           |          |        |       |  |  |
|           |           | smoking4cat                  |  |           |          |        |       |  |  |
|           |           | Former                       |  | -.2749115 | .0153597 | -17.90 | 0.000 |  |  |
| -.305016  | -.244807  |                              |  |           |          |        |       |  |  |
|           |           | Never                        |  | -.3506341 | .0163387 | -21.46 | 0.000 |  |  |
| -.3826574 | -.3186108 |                              |  |           |          |        |       |  |  |
|           |           | Missing                      |  | .2174937  | .0260512 | 8.35   | 0.000 |  |  |
| .1664343  | .2685531  |                              |  |           |          |        |       |  |  |
|           |           | gagne                        |  | .1285267  | .0021927 | 58.61  | 0.000 |  |  |
| .1242291  | .1328244  |                              |  |           |          |        |       |  |  |
|           |           | numipadmits                  |  | -.0054117 | .002982  | -1.81  | 0.070 |  |  |
| -.0112564 | .0004329  |                              |  |           |          |        |       |  |  |
|           |           | util_numpcstops              |  | .0020919  | .0005356 | 3.91   | 0.000 |  |  |
| .0010422  | .0031416  |                              |  |           |          |        |       |  |  |
|           |           | util_numscstops              |  | -.0056286 | .0004423 | -12.72 | 0.000 |  |  |
| -.0064955 | -.0047616 |                              |  |           |          |        |       |  |  |
|           |           | util_nummhstops              |  | -.0023689 | .0002572 | -9.21  | 0.000 |  |  |
| -.002873  | -.0018648 |                              |  |           |          |        |       |  |  |
|           |           | 1.immuno                     |  | .0438204  | .0142137 | 3.08   | 0.002 |  |  |
| .0159621  | .0716787  |                              |  |           |          |        |       |  |  |
|           |           | 1.clcatindexdate             |  | .1551883  | .0306509 | 5.06   | 0.000 |  |  |
| .0951136  | .215263   |                              |  |           |          |        |       |  |  |
|           |           | nosos11cat                   |  |           |          |        |       |  |  |

|           |           |    |  |           |          |       |       |
|-----------|-----------|----|--|-----------|----------|-------|-------|
| -.2517097 | -.0583618 | 2  |  | -.1550357 | .0493244 | -3.14 | 0.002 |
| -.2203121 | -.0367613 | 3  |  | -.1285367 | .046825  | -2.75 | 0.006 |
| -.2962042 | -.1183132 | 4  |  | -.2072587 | .0453812 | -4.57 | 0.000 |
| -.3473065 | -.1734305 | 5  |  | -.2603685 | .0443569 | -5.87 | 0.000 |
| -.3585877 | -.1884224 | 6  |  | -.273505  | .0434103 | -6.30 | 0.000 |
| -.4110172 | -.2427239 | 7  |  | -.3268706 | .0429328 | -7.61 | 0.000 |
| -.4483724 | -.2814902 | 8  |  | -.3649313 | .0425728 | -8.57 | 0.000 |
| -.4502715 | -.2839878 | 9  |  | -.3671297 | .0424201 | -8.65 | 0.000 |
| -.2566986 | -.0889533 | 10 |  | -.1728259 | .042793  | -4.04 | 0.000 |
| -.056655  | .1780349  | 99 |  | .0606899  | .059871  | 1.01  | 0.311 |

|           |           |    |  |                      |          |        |       |
|-----------|-----------|----|--|----------------------|----------|--------|-------|
|           |           |    |  |                      |          |        |       |
|           |           |    |  | canscore7cat         |          |        |       |
|           |           |    |  | 2                    |          |        |       |
| .5668728  | .7230668  | 2  |  | .6449698             | .0398461 | 16.19  | 0.000 |
| .9693501  | 1.116816  | 3  |  | 1.043083             | .0376195 | 27.73  | 0.000 |
| 1.331678  | 1.478185  | 4  |  | 1.404931             | .037375  | 37.59  | 0.000 |
| 1.662649  | 1.81499   | 5  |  | 1.73882              | .0388632 | 44.74  | 0.000 |
| 1.866831  | 2.028117  | 6  |  | 1.947474             | .041145  | 47.33  | 0.000 |
| .9261645  | 1.154065  | 99 |  | 1.040115             | .0581389 | 17.89  | 0.000 |
|           |           |    |  |                      |          |        |       |
|           |           |    |  | neareststa3ndistance |          |        |       |
| .0017808  | .0023586  |    |  | .0020697             | .0001474 | 14.04  | 0.000 |
|           |           |    |  | _cons                |          |        |       |
| -8.298009 | -7.950727 |    |  | -8.124368            | .088594  | -91.70 | 0.000 |

-----  
 -----  
 . lroc, nograph //0.830

Logistic model for died\_181\_730

Number of observations = 1037423

Area under ROC curve = 0.8302

. predict mkg\_pr\_died181\_730  
 (option pr assumed; Pr(died\_181\_730))

. gen mkg\_pr\_died181\_730\_case = mkg\_pr\_died181\_730 if case==1  
 (1,037,423 missing values generated)



```

. drop mkg_pr*

.
. *-----
. * PP1 mortality for COVID+ Veterans and comparators
. *-----
.
.      /*
>
>      Criteria
>      1) Case and at least 1 comparator in the strata must be
alive on the
>
>              first day of the period
>
>      2) Patients who were censored due to an infection
crossover
>
>              in the previous period are excluded in the
current period
>
>      3) Patients who die after the infection crossover are
alive
>
>              at the time of the infection crossover
>
>      */
.
.
.
. * Overall *
.
. * 90-day mortality
. tab died_0_90_crossover infected , co

```

```

+-----+
| Key          |
|-----|
| frequency    |
| column percentage |
+-----+

```

| died_0_90_crossover | infected  |         | Total     |
|---------------------|-----------|---------|-----------|
|                     | 0         | 1       |           |
| 0                   | 1,027,181 | 195,646 | 1,222,827 |
|                     | 99.01     | 94.03   | 98.18     |
| 1                   | 10,242    | 12,415  | 22,657    |
|                     | 0.99      | 5.97    | 1.82      |
| Total               | 1,037,423 | 208,061 | 1,245,484 |
|                     | 100.00    | 100.00  | 100.00    |

```

. cs died_0_90_crossover infected

```

```

| infected |

```

|                 | Exposed        | Unexposed | Total                |          |
|-----------------|----------------|-----------|----------------------|----------|
| Cases           | 12415          | 10242     | 22657                |          |
| Noncases        | 195646         | 1027181   | 1222827              |          |
| Total           | 208061         | 1037423   | 1245484              |          |
| Risk            | .05967         | .0098725  | .0181913             |          |
|                 | Point estimate |           | [95% conf. interval] |          |
| Risk difference | .0497975       |           | .048762              | .0508329 |
| Risk ratio      | 6.044037       |           | 5.890475             | 6.201604 |
| Attr. frac. ex. | .8345477       |           | .8302344             | .8387514 |
| Attr. frac. pop | .457294        |           |                      |          |

chi2(1) = 24062.00 Pr>chi2 = 0.0000

```
.
. * 180-day mortality
. tab died_91_180_crossover infected if alive_day91_crosscasecontrol==1
, co
```

```
+-----+
| Key |
|-----|
| frequency |
| column percentage |
+-----+
```

| died_91_18  | infected |         | Total     |
|-------------|----------|---------|-----------|
| 0_crossover | 0        | 1       |           |
| 0           | 957,712  | 193,579 | 1,151,291 |
|             | 99.14    | 98.96   | 99.11     |
| 1           | 8,335    | 2,044   | 10,379    |
|             | 0.86     | 1.04    | 0.89      |
| Total       | 966,047  | 195,623 | 1,161,670 |
|             | 100.00   | 100.00  | 100.00    |

```
. cs died_91_180_crossover infected if alive_day91_crosscasecontrol==1
```

|          | infected |           | Total    |
|----------|----------|-----------|----------|
|          | Exposed  | Unexposed |          |
| Cases    | 2044     | 8335      | 10379    |
| Noncases | 193579   | 957712    | 1151291  |
| Total    | 195623   | 966047    | 1161670  |
| Risk     | .0104487 | .0086279  | .0089346 |

|                 | Point estimate | [95% conf. interval] |          |
|-----------------|----------------|----------------------|----------|
| Risk difference | .0018207       | .0013338             | .0023076 |
| Risk ratio      | 1.211026       | 1.154118             | 1.270741 |
| Attr. frac. ex. | .1742542       | .1335377             | .2130574 |
| Attr. frac. pop | .0343169       |                      |          |

chi2(1) = 60.90 Pr>chi2 = 0.0000

```
. * 365-day mortality
. tab died_181_365_crossover infected if
alive_day181_crosscasecontrol==1 , co
```

```
+-----+
| Key |
|-----|
| frequency |
| column percentage |
+-----+
```

| died_181_365_crossover | infected          |                   | Total               |
|------------------------|-------------------|-------------------|---------------------|
|                        | 0                 | 1                 |                     |
| 0                      | 930,617<br>98.19  | 190,130<br>98.23  | 1,120,747<br>98.20  |
| 1                      | 17,158<br>1.81    | 3,432<br>1.77     | 20,590<br>1.80      |
| Total                  | 947,775<br>100.00 | 193,562<br>100.00 | 1,141,337<br>100.00 |

```
. cs died_181_365_crossover infected if alive_day181_crosscasecontrol==1
```

|          | infected |           | Total    |
|----------|----------|-----------|----------|
|          | Exposed  | Unexposed |          |
| Cases    | 3432     | 17158     | 20590    |
| Noncases | 190130   | 930617    | 1120747  |
| Total    | 193562   | 947775    | 1141337  |
| Risk     | .0177308 | .0181035  | .0180402 |

  

|                 | Point estimate | [95% conf. interval] |          |
|-----------------|----------------|----------------------|----------|
| Risk difference | -.0003727      | -.001019             | .0002736 |
| Risk ratio      | .9794128       | .9444768             | 1.015641 |
| Prev. frac. ex. | .0205872       | -.0156411            | .0555232 |
| Prev. frac. pop | .0034914       |                      |          |

chi2(1) = 1.26 Pr>chi2 = 0.2616

```
.
. * 730-day mortality
. tab died_366_730_crossover infected if
alive_day366_crosscasecontrol==1, co
```

```
+-----+
| Key |
|-----|
| frequency |
| column percentage |
+-----+
```

| died_366_730_crossover | infected          |                   | Total               |
|------------------------|-------------------|-------------------|---------------------|
|                        | 0                 | 1                 |                     |
| 0                      | 861,248<br>98.64  | 179,086<br>98.61  | 1,040,334<br>98.64  |
| 1                      | 11,877<br>1.36    | 2,517<br>1.39     | 14,394<br>1.36      |
| Total                  | 873,125<br>100.00 | 181,603<br>100.00 | 1,054,728<br>100.00 |

```
. cs died_366_730_crossover infected if alive_day366_crosscasecontrol==1
```

|                 | infected       |           | Total                |
|-----------------|----------------|-----------|----------------------|
|                 | Exposed        | Unexposed |                      |
| Cases           | 2517           | 11877     | 14394                |
| Noncases        | 179086         | 861248    | 1040334              |
| Total           | 181603         | 873125    | 1054728              |
| Risk            | .0138599       | .0136029  | .0136471             |
|                 | Point estimate |           | [95% conf. interval] |
| Risk difference | .000257        |           | -.000333 0.0008471   |
| Risk ratio      | 1.018896       |           | .9762958 1.063355    |
| Attr. frac. ex. | .0185456       |           | -.0242797 .0595803   |
| Attr. frac. pop | .003243        |           |                      |

chi2(1) = 0.74 Pr>chi2 = 0.3903

```
.
.
.
*****
*
. * Per Protocol #1 - Cox Models: Censoring at Crossover Infections
```

(Unadjusted) \*

.  
\*\*\*\*\*

. \*-----  
. \* Prepping for Cox Models  
. \*-----

. \*\* Censoring at 730 Days -Or- Among Comparators, at Infection Crossover \*\*

. \* count number who were COVID+ prior to death or study end  
. count if ttinfection730  
(13,998 real changes made)

. replace tte\_730\_cross = indextodeath\_caseindex if  
indextodeath\_caseindex730  
(1,150,277 real changes made)

. replace died\_730\_cross = 0 if indextodeath\_caseindex>ttinfection  
(12,311 real changes made)

. replace died\_730\_cross = 0 if (indextodeath\_caseindex>ttstudyend) &  
(inrange(indextodeath\_caseindex, 0, 730)) ///  
>  
& (inrange(ttstudyend, 0, 730))  
(10,817 real changes made)

. tab died\_730\_cross

| died_730_cr | oss | Freq.     | Percent | Cum.   |
|-------------|-----|-----------|---------|--------|
| 0           |     | 1,173,405 | 94.21   | 94.21  |
| 1           |     | 72,079    | 5.79    | 100.00 |
| Total       |     | 1,245,484 | 100.00  |        |

. \*-----  
. \* Per Protocol #1: Cox Models  
. \*-----

. preserve

. \* stset data  
. sort uniq\_patid

. stset tte\_730\_cross, failure(died\_730\_cross) id(uniq\_patid)

Survival-time data settings



```
      ID variable: uniq_patid
      Failure event: died_730_cross!=0 & died_730_cross<.
Observed time interval: (tte_730_cross[_n-1], tte_730_cross]
      Exit on or before: failure
```

```
-----
--
 1,245,484 total observations
      347 observations end on or before enter()
-----
```

```
--
 1,245,137 observations remaining, representing
 1,245,137 subjects
      71,738 failures in single-failure-per-subject data
575765083 total analysis time at risk and under observation
                                         At risk from t =
0
                                         Earliest observed entry t =
0
                                         Last observed exit t =
730
```

```
.      stsplit period, at(0 90 180 365 730)
(3,457,111 observations (episodes) created)

.
.      * create new interaction variables after splitting data
.      gen timeinfected_0_90 = infected * (tte_730_cross<=90)

.      gen timeinfected_91_180 = infected * (tte_730_cross>90 &
tte_730_cross<=180)

.      gen timeinfected_181_365 = infected * (tte_730_cross>180 &
tte_730_cross<=365)

.      gen timeinfected_366_730 = infected * (tte_730_cross>365 &
tte_730_cross<=730)

.
.      * cox model
.      stcox i.timeinfected_0_90 i.timeinfected_91_180
i.timeinfected_181_365 ///
>                          i.timeinfected_366_730
///
>                          , efron vce(cluster patienticn)
strata(matchgroupnumber)
```

```
      Failure _d: died_730_cross
Analysis time _t: tte_730_cross
      ID variable: uniq_patid
```

```
Iteration 0: log pseudolikelihood = -123060.13
Iteration 1: log pseudolikelihood = -116684.28
```

```

Iteration 2:  log pseudolikelihood = -114516.47
Iteration 3:  log pseudolikelihood = -114388.85
Iteration 4:  log pseudolikelihood = -114388.84
Refining estimates:
Iteration 0:  log pseudolikelihood = -114388.84

```

```

Stratified Cox regression with Efron method for ties
Strata variable: matchgroupnumber

```

```

No. of subjects = 1,245,137           Number of obs =
4,702,248
No. of failures =    71,738
Time at risk    = 575765083

Wald chi2(4) =
22970.84
Log pseudolikelihood = -114388.84    Prob > chi2 =
0.0000

```

(Std. err. adjusted for 1,091,935

clusters in patienticn)

```

-----
-----

```

|                        | _t | Haz. ratio | Robust<br>std. err. | z      | P> z  | [95% |
|------------------------|----|------------|---------------------|--------|-------|------|
| 1.timeinfected_0_90    |    | 6.357467   | .0777116            | 151.32 | 0.000 |      |
| 6.206965               |    | 6.511618   |                     |        |       |      |
| 1.timeinfected_91_180  |    | 1.176034   | .0264245            | 7.22   | 0.000 |      |
| 1.125366               |    | 1.228982   |                     |        |       |      |
| 1.timeinfected_181_365 |    | .920783    | .0164475            | -4.62  | 0.000 |      |
| .8891043               |    | .9535903   |                     |        |       |      |
| 1.timeinfected_366_730 |    | .8922076   | .0181327            | -5.61  | 0.000 |      |
| .8573668               |    | .9284643   |                     |        |       |      |

```

-----
-----

```

```

.
. restore
.
.
.
. *-----
. * Preparing dataset for IPCWs
. *-----
.
. *save Data\prepdata_pp1_ipcw, replace
.
. preserve
.
.
. * open dataset

```

```

.       use Data\prepdata_pp1_ipcw, clear
(Created in file
'P:\ORD_Ioannou_202104007D\MethodsGroup\Programs\CORC_DataExplor)

.
.       * create a fractional tte_730_cross variable by dividing by 32
.       gen tte_month_cross = tte_730_cross/32

.
.       * keep only variables needed for analysis
.       keep      /* patient identifiers*/
///  

>               matchgroupnumber patienticn uniq_patid case
index_dt      ///  

>               index_dt_case
///  

>               /* covariates */
///  

>               ageatindexdate bmi ethnicity3cat smoking4cat
///  

>               gagne numipadmits util_numpcstops
util_numscstops      ///  

>               nosos11cat canscore7cat neareststa3ndistance
///  

>               /*variables for subgroup analyses*/
///  

>               pr_died0_90_tertile pr_died181_730_tertile
///  

>               age_less65_case age_65to85_case
age_more85_case      ///  

>               gagne_tertile_case
///  

>               /*variables for cox models*/
///  

>               tte_month_cross died_730_cross tte_730_cross

.
.       * organize dataset
.       order uniq_patid, after(patienticn)

.       order index_dt_case, after(index_dt)

.
.       * set up dataset for analysis in SAS
.       expand tte_month_cross +1 //+1 so that we can include month 0
(1,198,827 noninteger counts rounded to integer)
(18,019,710 observations created)

.       bysort matchgroupnumber patienticn: gen monthend=_n

.
.       gen month = monthend-1

.

```

```

.      * drop expanded months in which the tte month is less than or
equal to the
.      * start of the month; in the expand command, tte months that
were x.5
.      * added an additional month. we want to confirm that the tte
month
.      * always exceeds the start of the month
.      drop if tte_month_cross<=month & tte_month_cross!=0
(670,801 observations deleted)

.
.      * create mortality variable
.      bysort matchgroupnumber patienticn: gen N = _N

.      gen died = 0

.      replace died = 1 if died_730_cross==1 & monthend==N
(72,079 real changes made)

.
.      * identify the last observation in the panel. this will be
used for
.      * filling in the new tte variable created (below) with the
value in
.      * the tte_month_cross variable for the last month the subject
is in the study
.      gsort matchgroupnumber patienticn -month

.      by matchgroupnumber patienticn: gen lastnum = _n

.
.      * create tte
.      gen tte=monthend

.
.      * replace the new tte with the tte_month_cross
variable in the month when
.      * tte occurs
.      replace tte = tte_month_cross if lastnum==1
(1,199,174 real changes made)

.
.      sort matchgroupnumber patienticn month

.
.      * censor each month unless it is a month when a patient dies
.      gen censor = 1

.      replace censor = 0 if died==1
(72,079 real changes made)

.
.      * merge in IPCWs
.      bysort matchgroupnumber patienticn (monthend): gen panel_n=_n

```

```
. merge 1:1 matchgroupnumber patienticn panel_n using
Data\IPCW\ipcw_trunc
```

| Result      | Number of obs |              |
|-------------|---------------|--------------|
| Not matched | 2,112,906     |              |
| from master | 0             | ( _merge==1) |
| from using  | 2,112,906     | ( _merge==2) |
| Matched     | 18,594,393    | ( _merge==3) |

```
. drop if _merge==2
(2,112,906 observations deleted)
```

```
. * drop variables not needed for analysis
. drop died_730_cross tte_730_cross tte_month_cross monthend N
smdate year _merge panel_n
```

```
. * organize variables in dataset
. order matchgroupnumber patienticn uniq_patid case index_dt
index_dt_case month tte died censor ipcw
```

```
. * save dataset for inclusion of IPCWs
. *save Data\mortality_pp1_ipcw_20221215, replace
.
. restore
```

```
. *****
. * PP2: With Censoring, Unweighted *
. *****
```

```
. use Data\prepdata_pp1_ipcw, clear
(Created in file
'P:\ORD_Ioannou_202104007D\MethodsGroup\Programs\CORC_DataExplor)
```

```
. * check ttinfection with negative values
. sum ttinfection
```

| Variable    | Obs     | Mean     | Std. dev. | Min | Max |
|-------------|---------|----------|-----------|-----|-----|
| ttinfection | 137,326 | 338.8583 | 179.3397  | 0   | 867 |

```
. count if ttinfection==0
6
```

```

. * identify the earliest infection crossover for the strata
. gsort matchgroupnumber propensityscoreabsdiffrank -case

. by matchgroupnumber: egen ttinfection_strata = min(ttinfection)
(630,819 missing values generated)

.
. *-----
-----
. * identify those who die during each period;
. * those who die after infection crossover are coded as not dead at the
time of
. * crossover
. *-----
-----

.
. * Died Index Day-Day 90;
. gen died_0_90_stratacrossover = .
(1,245,484 missing values generated)

. replace died_0_90_stratacrossover = 1 if
inrange(indextodeath_caseindex, 0, 90)
(23,814 real changes made)

. replace died_0_90_stratacrossover = 0 if indextodeath_caseindex>90
(1,221,670 real changes made)

. replace died_0_90_stratacrossover = 0 if
indextodeath_caseindex>ttinfection_strata
(1,685 real changes made)

. tab died_0_90 died_0_90_stratacrossover, m

      | died_0_90_stratacross
      |         over
died_0_90 |         0         1 |         Total
-----+-----+-----+-----
      0 | 1,221,670         0 | 1,221,670
      1 |   1,685       22,129 |   23,814
-----+-----+-----+-----
      Total | 1,223,355       22,129 | 1,245,484

.
. * Died Day 91-180;
. gen died_91_180_stratacrossover = .
(1,245,484 missing values generated)

. replace died_91_180_stratacrossover = 1 if
inrange(indextodeath_caseindex, 91, 180)
(12,359 real changes made)

. replace died_91_180_stratacrossover = 0 if indextodeath_caseindex>180
(1,209,311 real changes made)

```

```

. replace died_91_180_stratacrossover = 0 if
indextodeath_caseindex>ttinfection_strata
(4,058 real changes made)

. replace died_91_180_stratacrossover = 0 if
(indextodeath_caseindex>ttstudyend) & (inrange(indextodeath_caseindex,
91, 180)) ///
>
& (inrange(ttstudyend, 91, 180))
(0 real changes made)

. tab died_91_180 died_91_180_stratacrossover, m //missing represents
those who were censored in period 1

```

| died_91_18 | died_91_180_stratacrossover |       |        | Total     |
|------------|-----------------------------|-------|--------|-----------|
| 0          | 0                           | 1     | .      |           |
| 0          | 1,209,311                   | 0     | 0      | 1,209,311 |
| 1          | 2,373                       | 9,986 | 0      | 12,359    |
| .          | 1,685                       | 0     | 22,129 | 23,814    |
| Total      | 1,213,369                   | 9,986 | 22,129 | 1,245,484 |

```

.
. * Died Day 181-365;
. gen died_181_365_stratacrossover = .
(1,245,484 missing values generated)

. replace died_181_365_stratacrossover = 1 if
inrange(indextodeath_caseindex, 181, 365)
(26,130 real changes made)

. replace died_181_365_stratacrossover = 0 if indextodeath_caseindex>365
(1,183,181 real changes made)

. replace died_181_365_stratacrossover = 0 if
indextodeath_caseindex>ttinfection_strata
(12,102 real changes made)

. replace died_181_365_stratacrossover = 0 if
(indextodeath_caseindex>ttstudyend) & (inrange(indextodeath_caseindex,
181, 365)) ///
>
& (inrange(ttstudyend, 181, 365))
(37 real changes made)

. tab died_181_365 died_181_365_stratacrossover, m //missing represents
those who were censored in period 1&2

```

| died_181_3 | died_181_365_stratacrossover |        |   | Total     |
|------------|------------------------------|--------|---|-----------|
| 65         | 0                            | 1      | . |           |
| 0          | 1,183,244                    | 0      | 0 | 1,183,244 |
| 1          | 8,018                        | 18,049 | 0 | 26,067    |

|                         |  |           |        |        |  |           |
|-------------------------|--|-----------|--------|--------|--|-----------|
| .                       |  | 4,058     | 0      | 32,115 |  | 36,173    |
| -----+-----+-----+----- |  |           |        |        |  |           |
| Total                   |  | 1,195,320 | 18,049 | 32,115 |  | 1,245,484 |

```
.
. * Died Day 366-730;
. gen died_366_730_stratacrossover = .
(1,245,484 missing values generated)

. replace died_366_730_stratacrossover = 1 if
inrange(indextodeath_caseindex, 366, 730)
(32,904 real changes made)

. replace died_366_730_stratacrossover = 0 if indextodeath_caseindex>730
(1,150,277 real changes made)

. replace died_366_730_stratacrossover = 0 if
indextodeath_caseindex>ttinfection_strata
(28,416 real changes made)

. replace died_366_730_stratacrossover = 0 if
(indextodeath_caseindex>ttstudyend) & (inrange(indextodeath_caseindex,
366, 730)) ///
>
& (inrange(ttstudyend, 366, 730))
(5,987 real changes made)

.
. tab died_366_730 died_366_730_stratacrossover, m //missing represents
those who were censored in period 1-3
```

| died_366_730 | died_366_730_stratacrossover |        |        | Total     |
|--------------|------------------------------|--------|--------|-----------|
|              | 0                            | 1      | .      |           |
| 0            | 1,162,593                    | 0      | 0      | 1,162,593 |
| 1            | 9,985                        | 10,603 | 0      | 20,588    |
| .            | 12,102                       | 0      | 50,201 | 62,303    |
| Total        | 1,184,680                    | 10,603 | 50,201 | 1,245,484 |

```
.
. *-----
. * for each period, identify whether the case and at least one
comparator
. * in a matched group are alive on the first day of the period, AND
. * their strata does not have an infection crossover in the prior
period(s)
. *-----
.
. * Alive on day 91 & no strata crossover in prior period
. gen alive_day91_stratacrossover = .
(1,245,484 missing values generated)
```



```
. replace alive_day91_stratacrossover = 1 if indextodeath_caseindex>=91
(1,221,670 real changes made)
```

```
. replace alive_day91_stratacrossover = 0 if
inrange(indextodeath_caseindex, 0, 90)
(23,814 real changes made)
```

```
. replace alive_day91_stratacrossover = 0 if inrange(ttinfection_strata,
0, 90)
(93,866 real changes made)
```

```
. replace alive_day91_stratacrossover = 0 if ttstudyend<91
(0 real changes made)
```

```
.
. sum ttinfection_strata if inrange(ttinfection_strata, 0, 90)
```

| Variable     | Obs    | Mean     | Std. dev. | Min | Max |
|--------------|--------|----------|-----------|-----|-----|
| ttinfectio~a | 97,014 | 45.60414 | 22.58688  | 0   | 90  |

```
. tab alive_day91 alive_day91_stratacrossover, m
```

| alive_day91 | alive_day91_stratacrossover | Total     |
|-------------|-----------------------------|-----------|
| 0           | 23,814                      | 23,814    |
| 1           | 93,866                      | 1,127,804 |
| Total       | 117,680                     | 1,245,484 |

```
.
. * Alive on day 181 & no strata crossover in prior periods
. gen alive_day181_stratacrossover = .
(1,245,484 missing values generated)
```

```
. replace alive_day181_stratacrossover = 1 if
indextodeath_caseindex>=181
(1,209,311 real changes made)
```

```
. replace alive_day181_stratacrossover = 0 if
inrange(indextodeath_caseindex, 0, 180)
(36,173 real changes made)
```

```
. replace alive_day181_stratacrossover = 0 if
inrange(ttinfection_strata, 0, 180)
(158,980 real changes made)
```

```
. replace alive_day181_stratacrossover = 0 if ttstudyend<181
(0 real changes made)
```

```
.
```

```
. sum ttinfection_strata if inrange(ttinfection_strata, 0, 180)
```

| Variable     | Obs     | Mean     | Std. dev. | Min | Max |
|--------------|---------|----------|-----------|-----|-----|
| ttinfectio~a | 166,097 | 83.04211 | 50.51589  | 0   | 180 |

```
. tab alive_day181 alive_day181_stratacrossover
```

| alive_day181 | alive_day181_stratacrossover |           | Total     |
|--------------|------------------------------|-----------|-----------|
| 81           | 0                            | 1         |           |
| 0            | 36,173                       | 0         | 36,173    |
| 1            | 158,980                      | 1,050,331 | 1,209,311 |
| Total        | 195,153                      | 1,050,331 | 1,245,484 |

```
. * Alive on day 366 & no strata crossover in prior periods  
. gen alive_day366_stratacrossover = .  
(1,245,484 missing values generated)
```

```
. replace alive_day366_stratacrossover = 1 if  
indextodeath_caseindex>=366  
(1,183,181 real changes made)
```

```
. replace alive_day366_stratacrossover = 0 if  
inrange(indextodeath_caseindex, 0, 365)  
(62,303 real changes made)
```

```
. replace alive_day366_stratacrossover = 0 if  
inrange(ttinfection_strata, 0, 365)  
(348,881 real changes made)
```

```
. replace alive_day366_stratacrossover = 0 if ttstudyend<366  
(33,944 real changes made)
```

```
. sum ttinfection_strata if inrange(ttinfection_strata, 0, 365)
```

| Variable     | Obs     | Mean     | Std. dev. | Min | Max |
|--------------|---------|----------|-----------|-----|-----|
| ttinfectio~a | 371,401 | 192.4092 | 111.3391  | 0   | 365 |

```
. tab alive_day366 alive_day366_stratacrossover
```

| alive_day366 | alive_day366_stratacrossover |         | Total     |
|--------------|------------------------------|---------|-----------|
| 66           | 0                            | 1       |           |
| 0            | 114,374                      | 0       | 114,374   |
| 1            | 330,754                      | 800,356 | 1,131,110 |
| Total        | 445,128                      | 800,356 | 1,245,484 |

```

.
. *-----
-----
. * for each period, identify whether the case and at least one
comparator
. * in a matched group are alive on the first day of the period & were
not
. * in an infection crossover strata in the prior period
. *-----
-----
.
. foreach i of numlist 91 181 366 {
2.
. //cases
. gen alive_day`i'_stratacase = 0
3. replace alive_day`i'_stratacase = 1 if case==1 &
alive_day`i'_stratacrossover==1
4. replace alive_day`i'_stratacase = 0 if case==1 &
ttstudyend<`i'
5. tab alive_day`i'_stratacase alive_day`i'_stratacrossover if
case==1
6. sum indextodeath if indextodeath<`i' & case==1
7.
. bysort matchgroupnumber: egen alive_day`i'_stratacase_grp =
max(alive_day`i'_stratacase)
8.
. //comparators
. gen alive_day`i'_stratacontrol = 0
9. replace alive_day`i'_stratacontrol = 1 if case==0 &
alive_day`i'_stratacrossover==1
10. replace alive_day`i'_stratacontrol = 0 if case==0 &
ttstudyend<`i'
11.
. tab alive_day`i'_stratacontrol alive_day`i'_stratacrossover if
case==0
12. sum indextodeath if indextodeath<`i' & case==0
13.
. bysort matchgroupnumber: egen alive_day`i'_stratacontrol_num =
sum(alive_day`i'_stratacontrol)
14.
. //case and at least one comparator alive on day`i'
. gen alive_day`i'_stratacasecontrol = 0
15. replace alive_day`i'_stratacasecontrol = 1 if
alive_day`i'_stratacase_grp==1 & alive_day`i'_stratacontrol_num>=1
16.
. tab alive_day`i'_stratacasecontrol case
17.
. //drop variables we no longer need
. drop alive_day`i'_stratacase alive_day`i'_stratacase_grp
alive_day`i'_stratacontrol alive_day`i'_stratacontrol_num
18.
. }
(180,575 real changes made)

```

(0 real changes made)

| alive_day9<br>1_strataca<br>se | alive_day91_stratacro<br>ssover |         | Total   |
|--------------------------------|---------------------------------|---------|---------|
| 0                              | 27,486                          | 0       | 27,486  |
| 1                              | 0                               | 180,575 | 180,575 |
| Total                          | 27,486                          | 180,575 | 208,061 |

| Variable     | Obs    | Mean     | Std. dev. | Min | Max |
|--------------|--------|----------|-----------|-----|-----|
| indextodea~x | 12,415 | 22.35747 | 19.79229  | 0   | 90  |

(947,229 real changes made)

(0 real changes made)

| alive_day9<br>1_strataco<br>ntrol | alive_day91_stratacro<br>ssover |         | Total     |
|-----------------------------------|---------------------------------|---------|-----------|
| 0                                 | 90,194                          | 0       | 90,194    |
| 1                                 | 0                               | 947,229 | 947,229   |
| Total                             | 90,194                          | 947,229 | 1,037,423 |

| Variable     | Obs    | Mean   | Std. dev. | Min | Max |
|--------------|--------|--------|-----------|-----|-----|
| indextodea~x | 11,399 | 44.554 | 25.89809  | 0   | 90  |

(1,080,852 real changes made)

| alive_day9<br>1_strataca<br>secontrol | indicator: is<br>`index_dt` the date<br>of the first positive<br>covid-19 test result<br>for |         | Total     |
|---------------------------------------|----------------------------------------------------------------------------------------------|---------|-----------|
| 0                                     | 137,142                                                                                      | 27,490  | 164,632   |
| 1                                     | 900,281                                                                                      | 180,571 | 1,080,852 |
| Total                                 | 1,037,423                                                                                    | 208,061 | 1,245,484 |

(167,998 real changes made)

(0 real changes made)

| alive_day1<br>81_stratac<br>ase | alive_day181_stratacr<br>ossover |         | Total   |
|---------------------------------|----------------------------------|---------|---------|
| 0                               | 40,063                           | 0       | 40,063  |
| 1                               | 0                                | 167,998 | 167,998 |
| Total                           | 40,063                           | 167,998 | 208,061 |

| Variable     | Obs    | Mean     | Std. dev. | Min | Max |
|--------------|--------|----------|-----------|-----|-----|
| indextodea~x | 14,459 | 38.05222 | 43.91964  | 0   | 180 |

(882,333 real changes made)  
(0 real changes made)

| Variable         | Obs       | Mean     | Std. dev. | Min | Max |
|------------------|-----------|----------|-----------|-----|-----|
| alive_day1       | 155,090   | 0        | 0         | 0   | 0   |
| 81_stratacontrol | 882,333   | 0.882333 | 0.316227  | 0   | 1   |
| Total            | 1,037,423 | 0.882333 | 0.316227  | 0   | 1   |

| Variable     | Obs    | Mean     | Std. dev. | Min | Max |
|--------------|--------|----------|-----------|-----|-----|
| indextodea~x | 21,714 | 87.84411 | 52.42273  | 0   | 180 |

(1,005,700 real changes made)

indicator: is  
`index\_dt` the date  
of the first positive  
alive\_day1 covid-19 test result  
81\_stratacontrol for

| Variable   | Obs       | Mean     | Std. dev. | Min | Max |
|------------|-----------|----------|-----------|-----|-----|
| asecontrol | 0         | 1        | 0         | 0   | 1   |
| Total      | 1,037,423 | 0.208061 | 0.406099  | 0   | 1   |

(128,351 real changes made)  
(0 real changes made)

| Variable         | Obs     | Mean     | Std. dev. | Min | Max |
|------------------|---------|----------|-----------|-----|-----|
| alive_day3       | 79,710  | 0        | 0         | 0   | 0   |
| 66_stratacontrol | 128,351 | 0.128351 | 0.336227  | 0   | 1   |
| Total            | 208,061 | 0.128351 | 0.336227  | 0   | 1   |

| Variable     | Obs    | Mean     | Std. dev. | Min | Max |
|--------------|--------|----------|-----------|-----|-----|
| indextodea~x | 17,900 | 83.07486 | 103.0125  | 0   | 365 |

(672,005 real changes made)  
(0 real changes made)

| Variable         | Obs     | Mean | Std. dev. | Min | Max |
|------------------|---------|------|-----------|-----|-----|
| alive_day3       | 365,418 | 0    | 0         | 0   | 0   |
| 66_stratacontrol | 0       | 1    | 0         | 0   | 1   |
| Total            | 365,418 | 0    | 0         | 0   | 0   |

|        |         |         |           |
|--------|---------|---------|-----------|
| 1      | 0       | 672,005 | 672,005   |
| -----+ |         |         |           |
| Total  | 365,418 | 672,005 | 1,037,423 |

| Variable     | Obs    | Mean  | Std. dev. | Min | Max |
|--------------|--------|-------|-----------|-----|-----|
| indextodea~x | 44,403 | 182.9 | 106.9272  | 0   | 365 |

(768,170 real changes made)

| indicator: is         |           |         |           |
|-----------------------|-----------|---------|-----------|
| `index_dt` the date   |           |         |           |
| of the first positive |           |         |           |
| covid-19 test result  |           |         |           |
| for                   |           |         |           |
| alive_day3            | 0         | 1       | Total     |
| -----+                |           |         |           |
| 66_stratac            | 397,595   | 79,719  | 477,314   |
| asecontrol            | 639,828   | 128,342 | 768,170   |
| -----+                |           |         |           |
| Total                 | 1,037,423 | 208,061 | 1,245,484 |

```

.
.
. *-----
. * PP2 Results
. *-----
.
.      /*
>
>      Criteria
>      1) Case and at least 1 comparator in the strata must be
alive on the
>
>              first day of the period
>
>      2) Everyone in the strata who was censored due to a
strata infection
>
>              crossover in the previous period is excluded
in the current period
>
>      3) People who die after the infection crossover are
considered alive
>
>              at the time of the infection crossover
>
>      */
.
.
. * Overall *
.
. * 90-day mortality
. tab died_0_90_stratacrossover infected , co

```

```

+-----+
| Key          |
|-----|

```

```

|      frequency      |
| column percentage  |
+-----+

```

```

died_0_90_ |
stratacross |      infected
  sover     |      0      1 |      Total
-----+-----+-----+-----+
          0 | 1,027,496  195,859 | 1,223,355
          |      99.04   94.14 |      98.22
-----+-----+-----+-----+
          1 |    9,927   12,202 |    22,129
          |      0.96    5.86 |      1.78
-----+-----+-----+-----+
        Total | 1,037,423  208,061 | 1,245,484
          |      100.00  100.00 |      100.00

```

```

. cs died_0_90_stratacrossover infected

```

```

          |      infected      |
          |      Exposed  Unexposed |      Total
-----+-----+-----+-----+
        Cases |      12202      9927 |      22129
        Noncases |      195859  1027496 |      1223355
-----+-----+-----+-----+
        Total |      208061  1037423 |      1245484
          |
        Risk |      .0586463  .0095689 |      .0177674
          |
          |      Point estimate      |      [95% conf. interval]
-----+-----+-----+-----+
Risk difference |      .0490774      |      .0480505  .0501042
Risk ratio      |      6.128839      |      5.971127  6.290716
Attr. frac. ex. |      .836837      |      .8325274  .8410356
Attr. frac. pop |      .4614345      |
-----+-----+-----+-----+
                                chi2(1) = 23918.44  Pr>chi2 = 0.0000

```

```

. * 180-day mortality
. tab died_91_180_stratacrossover infected if
alive_day91_stratacasecontrol==1 , co

```

```

+-----+
| Key      |
|-----|
| frequency |
| column percentage |
+-----+

```

```

died_91_18 |
0_stratacr |      infected
  ossover  |      0      1 |      Total
-----+-----+-----+

```

|       |         |         |           |
|-------|---------|---------|-----------|
| 0     | 884,062 | 178,780 | 1,062,842 |
|       | 99.15   | 99.01   | 99.13     |
| 1     | 7,566   | 1,791   | 9,357     |
|       | 0.85    | 0.99    | 0.87      |
| Total | 891,628 | 180,571 | 1,072,199 |
|       | 100.00  | 100.00  | 100.00    |

```
. cs died_91_180_stratacrossover infected if
alive_day91_stratacasecontrol==1
```

|                                  | infected       |           | Total                |
|----------------------------------|----------------|-----------|----------------------|
|                                  | Exposed        | Unexposed |                      |
| Cases                            | 1791           | 7566      | 9357                 |
| Noncases                         | 178780         | 884062    | 1062842              |
| Total                            | 180571         | 891628    | 1072199              |
| Risk                             | .0099185       | .0084856  | .0087269             |
|                                  | Point estimate |           | [95% conf. interval] |
| Risk difference                  | .0014329       |           | .0009378 .0019281    |
| Risk ratio                       | 1.168867       |           | 1.110466 1.230338    |
| Attr. frac. ex.                  | .1444704       |           | .0994775 .1872152    |
| Attr. frac. pop                  | .0276527       |           |                      |
| chi2(1) = 35.64 Pr>chi2 = 0.0000 |                |           |                      |

```
. * 365-day mortality
. tab died_181_365_stratacrossover infected if
alive_day181_stratacasecontrol==1 , co
```

```
+-----+
| Key          |
|-----|
| frequency    |
| column percentage |
+-----+
```

| died_181_3             | infected |         | Total   |
|------------------------|----------|---------|---------|
| 65_stratac<br>rossover | 0        | 1       |         |
| 0                      | 808,442  | 165,330 | 973,772 |
|                        | 98.29    | 98.42   | 98.31   |
| 1                      | 14,035   | 2,662   | 16,697  |
|                        | 1.71     | 1.58    | 1.69    |
| Total                  | 822,477  | 167,992 | 990,469 |



| 100.00 100.00 | 100.00

. cs died\_181\_365\_stratacrossover infected if  
alive\_day181\_stratacasecontrol==1

|                 | infected       |           |                        |
|-----------------|----------------|-----------|------------------------|
|                 | Exposed        | Unexposed | Total                  |
| Cases           | 2662           | 14035     | 16697                  |
| Noncases        | 165330         | 808442    | 973772                 |
| Total           | 167992         | 822477    | 990469                 |
| Risk            | .015846        | .0170643  | .0168577               |
|                 | Point estimate |           | [95% conf. interval]   |
| Risk difference | -.0012183      |           | -.0018778 -.0005588    |
| Risk ratio      | .9286045       |           | .8912122 .9675657      |
| Prev. frac. ex. | .0713955       |           | .0324343 .1087878      |
| Prev. frac. pop | .0121093       |           |                        |
|                 | chi2(1) =      |           | 12.49 Pr>chi2 = 0.0004 |

. \* 730-day mortality  
. tab died\_366\_730\_stratacrossover infected if  
alive\_day366\_stratacasecontrol==1 , co

```
+-----+
| Key          |
|-----|
| frequency    |
| column percentage |
+-----+
```

| died_366_730_stratacrossover | infected |         | Total   |
|------------------------------|----------|---------|---------|
|                              | 0        | 1       |         |
| 0                            | 608,168  | 126,869 | 735,037 |
|                              | 98.73    | 98.85   | 98.75   |
| 1                            | 7,833    | 1,473   | 9,306   |
|                              | 1.27     | 1.15    | 1.25    |
| Total                        | 616,001  | 128,342 | 744,343 |
|                              | 100.00   | 100.00  | 100.00  |

. cs died\_366\_730\_stratacrossover infected if  
alive\_day366\_stratacasecontrol==1

|  | infected |           | Total |
|--|----------|-----------|-------|
|  | Exposed  | Unexposed |       |

|                                  |                |          |                      |
|----------------------------------|----------------|----------|----------------------|
| Cases                            | 1473           | 7833     | 9306                 |
| Noncases                         | 126869         | 608168   | 735037               |
| Total                            | 128342         | 616001   | 744343               |
| Risk                             | .0114771       | .0127159 | .0125023             |
|                                  | Point estimate |          | [95% conf. interval] |
| Risk difference                  | -.0012387      |          | -.0018852 - .0005923 |
| Risk ratio                       | .9025832       |          | .8539939 .9539371    |
| Prev. frac. ex.                  | .0974168       |          | .0460629 .1460061    |
| Prev. frac. pop                  | .0167969       |          |                      |
| chi2(1) = 13.20 Pr>chi2 = 0.0003 |                |          |                      |

```

.
. *-----
. * Age <65
. *-----
.
. * 90-day mortality
. tab died_0_90_stratacrossover infected if agecat==1, co

```

```

+-----+
| Key |
|-----|
| frequency |
| column percentage |
+-----+

```

| died_0_90_ | infected |         | Total   |
|------------|----------|---------|---------|
| stratacros | 0        | 1       |         |
| sover      |          |         |         |
| 0          | 553,690  | 113,678 | 667,368 |
|            | 99.72    | 98.82   | 99.57   |
| 1          | 1,527    | 1,363   | 2,890   |
|            | 0.28     | 1.18    | 0.43    |
| Total      | 555,217  | 115,041 | 670,258 |
|            | 100.00   | 100.00  | 100.00  |

```

. cs died_0_90_stratacrossover infected if agecat==1

```

|          | infected |           | Total  |
|----------|----------|-----------|--------|
|          | Exposed  | Unexposed |        |
| Cases    | 1363     | 1527      | 2890   |
| Noncases | 113678   | 553690    | 667368 |
| Total    | 115041   | 555217    | 670258 |

| Risk            | .0118479       | .0027503 | .0043118             |          |
|-----------------|----------------|----------|----------------------|----------|
|                 | Point estimate |          | [95% conf. interval] |          |
| Risk difference | .0090977       |          | .0084574             | .0097379 |
| Risk ratio      | 4.307913       |          | 4.005608             | 4.633033 |
| Attr. frac. ex. | .767869        |          | .75035               | .7841587 |
| Attr. frac. pop | .3621472       |          |                      |          |

chi2(1) = 1837.19 Pr>chi2 = 0.0000

```
.
. * 180-day mortality
. tab died_91_180_stratacrossover infected if
alive_day91_stratacasecontrol==1 & agecat==1, co
```

```
+-----+
| Key          |
|-----|
| frequency    |
| column percentage |
+-----+
```

| died_91_180_stratacrossover | infected          |                   | Total             |
|-----------------------------|-------------------|-------------------|-------------------|
|                             | 0                 | 1                 |                   |
| 0                           | 483,658<br>99.76  | 104,745<br>99.75  | 588,403<br>99.76  |
| 1                           | 1,143<br>0.24     | 260<br>0.25       | 1,403<br>0.24     |
| Total                       | 484,801<br>100.00 | 105,005<br>100.00 | 589,806<br>100.00 |

```
. cs died_91_180_stratacrossover infected if
alive_day91_stratacasecontrol==1 & agecat==1
```

|                 | infected       |           | Total                |
|-----------------|----------------|-----------|----------------------|
|                 | Exposed        | Unexposed |                      |
| Cases           | 260            | 1143      | 1403                 |
| Noncases        | 104745         | 483658    | 588403               |
| Total           | 105005         | 484801    | 589806               |
| Risk            | .0024761       | .0023577  | .0023787             |
|                 | Point estimate |           | [95% conf. interval] |
| Risk difference | .0001184       |           | -.0002117 .0004486   |
| Risk ratio      | 1.050221       |           | .9180504 1.20142     |

```

Attr. frac. ex. |          .0478193          |    -.0892648    .1676514
Attr. frac. pop |          .0088617          |
+-----+
chi2(1) =          0.51    Pr>chi2 = 0.4752

```

```

.
. * 365-day mortality
. tab died_181_365_stratacrossover infected if
alive_day181_stratacasecontrol==1 & agecat==1, co

```

```

+-----+
| Key          |
|-----|
| frequency    |
| column percentage |
+-----+

```

| died_181_3         | infected |        | Total   |
|--------------------|----------|--------|---------|
| 65_stratacrossover | 0        | 1      |         |
| 0                  | 447,520  | 97,820 | 545,340 |
|                    | 99.52    | 99.57  | 99.53   |
| 1                  | 2,174    | 418    | 2,592   |
|                    | 0.48     | 0.43   | 0.47    |
| Total              | 449,694  | 98,238 | 547,932 |
|                    | 100.00   | 100.00 | 100.00  |

```

. cs died_181_365_stratacrossover infected if
alive_day181_stratacasecontrol==1 & agecat==1

```

|                 | infected       |           | Total                |
|-----------------|----------------|-----------|----------------------|
|                 | Exposed        | Unexposed |                      |
| Cases           | 418            | 2174      | 2592                 |
| Noncases        | 97820          | 447520    | 545340               |
| Total           | 98238          | 449694    | 547932               |
| Risk            | .004255        | .0048344  | .0047305             |
|                 | Point estimate |           | [95% conf. interval] |
| Risk difference | -.0005794      |           | -.0010342 - .0001247 |
| Risk ratio      | .8801452       |           | .7928536 .9770474    |
| Prev. frac. ex. | .1198548       |           | .0229526 .2071464    |
| Prev. frac. pop | .0214886       |           |                      |

```

+-----+
chi2(1) =          5.75    Pr>chi2 = 0.0165

```

```

. * 730-day mortality

```

```
. tab died_366_730_stratacrossover infected if
alive_day366_stratacasecontrol==1 & agecat==1, co
```

```
+-----+
| Key          |
|-----|
| frequency    |
| column percentage |
+-----+
```

| died_366_7         | infected |        | Total   |
|--------------------|----------|--------|---------|
| 30_stratacrossover | 0        | 1      |         |
| 0                  | 338,682  | 75,282 | 413,964 |
|                    | 99.64    | 99.73  | 99.65   |
| 1                  | 1,239    | 205    | 1,444   |
|                    | 0.36     | 0.27   | 0.35    |
| Total              | 339,921  | 75,487 | 415,408 |
|                    | 100.00   | 100.00 | 100.00  |

```
. cs died_366_730_stratacrossover infected if
alive_day366_stratacasecontrol==1 & agecat==1
```

|                                  | infected       |           | Total                |
|----------------------------------|----------------|-----------|----------------------|
|                                  | Exposed        | Unexposed |                      |
| Cases                            | 205            | 1239      | 1444                 |
| Noncases                         | 75282          | 338682    | 413964               |
| Total                            | 75487          | 339921    | 415408               |
| Risk                             | .0027157       | .003645   | .0034761             |
|                                  | Point estimate |           | [95% conf. interval] |
| Risk difference                  | -.0009293      |           | -.0013522 - .0005063 |
| Risk ratio                       | .7450551       |           | .6428347 .8635301    |
| Prev. frac. ex.                  | .2549449       |           | .1364699 .3571653    |
| Prev. frac. pop                  | .046328        |           |                      |
| +-----+                          |                |           |                      |
| chi2(1) = 15.40 Pr>chi2 = 0.0001 |                |           |                      |

```
.
. *-----
. * Age 65-85
. *-----
.
. * 90-day mortality
. tab died_0_90_stratacrossover infected if agecat==2, co
```

```
+-----+
```

```

| Key |
|-----|
| frequency |
| column percentage |
+-----+

```

```

died_0_90_ |
stratacross |          infected
  sover |          0          1 |          Total
-----+-----+-----+-----+
          0 |    425,403    74,600 |    500,003
          |    98.63    90.64 |    97.35
-----+-----+-----+-----+
          1 |     5,898     7,701 |    13,599
          |     1.37     9.36 |     2.65
-----+-----+-----+-----+
        Total |    431,301    82,301 |    513,602
          |    100.00    100.00 |    100.00

```

```

. cs died_0_90_stratacrossover infected if agecat==2

```

```

          |          infected          |
          |    Exposed    Unexposed    |          Total
-----+-----+-----+-----+
          Cases |          7701          5898 |          13599
          Noncases |          74600          425403 |          500003
-----+-----+-----+-----+
          Total |          82301          431301 |          513602
          Risk |    .0935712    .0136749 |    .0264777
          |          Point estimate          |          [95% conf. interval]
-----+-----+-----+-----+
          Risk difference |          .0798963          |          .0778766    .0819159
          Risk ratio |          6.842546          |          6.61987    7.072712
          Attr. frac. ex. |          .8538556          |          .8489396    .8586115
          Attr. frac. pop |          .4835313          |
-----+-----+-----+-----+

```

```

chi2(1) = 17115.34 Pr>chi2 = 0.0000

```

```

. * 180-day mortality
. tab died_91_180_stratacrossover infected if
alive_day91_stratacasecontrol==1 & agecat==2, co

```

```

+-----+
| Key |
|-----|
| frequency |
| column percentage |
+-----+

```

```

died_91_18 |
0_stratacr |          infected

```

| ossover | 0                 | 1                | Total             |
|---------|-------------------|------------------|-------------------|
| 0       | 361,087<br>98.75  | 67,472<br>98.40  | 428,559<br>98.70  |
| 1       | 4,561<br>1.25     | 1,098<br>1.60    | 5,659<br>1.30     |
| Total   | 365,648<br>100.00 | 68,570<br>100.00 | 434,218<br>100.00 |

. cs died\_91\_180\_stratacrossover infected if  
alive\_day91\_stratacasecontrol==1 & agecat==2

|                                  | infected       |           | Total                |
|----------------------------------|----------------|-----------|----------------------|
|                                  | Exposed        | Unexposed |                      |
| Cases                            | 1098           | 4561      | 5659                 |
| Noncases                         | 67472          | 361087    | 428559               |
| Total                            | 68570          | 365648    | 434218               |
| Risk                             | .0160128       | .0124737  | .0130326             |
|                                  | Point estimate |           | [95% conf. interval] |
| Risk difference                  | .0035391       |           | .002533 .0045451     |
| Risk ratio                       | 1.283723       |           | 1.20248 1.370455     |
| Attr. frac. ex.                  | .2210157       |           | .1683855 .2703152    |
| Attr. frac. pop                  | .0428831       |           |                      |
| chi2(1) = 56.23 Pr>chi2 = 0.0000 |                |           |                      |

. \* 365-day mortality  
. tab died\_181\_365\_stratacrossover infected if  
alive\_day181\_stratacasecontrol==1 & agecat==2, co

| +-----+           |                  |                 |                  |
|-------------------|------------------|-----------------|------------------|
| Key               |                  |                 |                  |
| frequency         |                  |                 |                  |
| column percentage |                  |                 |                  |
| +-----+           |                  |                 |                  |
| died_181_3        | infected         |                 |                  |
| 65_stratac        | rossover         |                 |                  |
|                   | 0                | 1               | Total            |
| 0                 | 327,676<br>97.46 | 61,926<br>97.46 | 389,602<br>97.46 |
| 1                 | 8,537<br>2.54    | 1,614<br>2.54   | 10,151<br>2.54   |

|       | 336,213 | 63,540 | 399,753 |
|-------|---------|--------|---------|
| Total | 100.00  | 100.00 | 100.00  |

. cs died\_181\_365\_stratacrossover infected if  
alive\_day181\_stratacasecontrol==1 & agecat==2

|                                 | infected       |                      | Total    |
|---------------------------------|----------------|----------------------|----------|
|                                 | Exposed        | Unexposed            |          |
| Cases                           | 1614           | 8537                 | 10151    |
| Noncases                        | 61926          | 327676               | 389602   |
| Total                           | 63540          | 336213               | 399753   |
| Risk                            | .0254013       | .0253916             | .0253932 |
|                                 | Point estimate | [95% conf. interval] |          |
| Risk difference                 | 9.68e-06       | -.0013243            | .0013436 |
| Risk ratio                      | 1.000381       | .9491986             | 1.054324 |
| Attr. frac. ex.                 | .0003811       | -.0535203            | .0515247 |
| Attr. frac. pop                 | .0000606       |                      |          |
| chi2(1) = 0.00 Pr>chi2 = 0.9887 |                |                      |          |

. \* 730-day mortality  
. tab died\_366\_730\_stratacrossover infected if  
alive\_day366\_stratacasecontrol==1 & agecat==2, co

```
+-----+
| Key          |
+-----+
| frequency    |
| column percentage |
+-----+
```

| died_366_730_stratacrossover | infected |        | Total   |
|------------------------------|----------|--------|---------|
|                              | 0        | 1      |         |
| 0                            | 245,990  | 47,500 | 293,490 |
|                              | 98.12    | 98.07  | 98.12   |
| 1                            | 4,703    | 933    | 5,636   |
|                              | 1.88     | 1.93   | 1.88    |
| Total                        | 250,693  | 48,433 | 299,126 |
|                              | 100.00   | 100.00 | 100.00  |

. cs died\_366\_730\_stratacrossover infected if  
alive\_day366\_stratacasecontrol==1 & agecat==2



|                 | infected       |           |                       |
|-----------------|----------------|-----------|-----------------------|
|                 | Exposed        | Unexposed | Total                 |
| Cases           | 933            | 4703      | 5636                  |
| Noncases        | 47500          | 245990    | 293490                |
| Total           | 48433          | 250693    | 299126                |
| Risk            | .0192637       | .01876    | .0188416              |
|                 | Point estimate |           | [95% conf. interval]  |
| Risk difference | .0005037       |           | -.0008306 .0018381    |
| Risk ratio      | 1.026851       |           | .9578449 1.100829     |
| Attr. frac. ex. | .026149        |           | -.0440104 .0915936    |
| Attr. frac. pop | .0043288       |           |                       |
|                 | chi2(1) =      |           | 0.56 Pr>chi2 = 0.4554 |

```
.
. *-----
. * Age 85+
. *-----
.
. * 90-day mortality
. tab died_0_90_strata crossover infected if agecat==3, co
```

```
+-----+
| Key |
|-----|
| frequency |
| column percentage |
+-----+
```

| died_0_90_       | infected |        |        |
|------------------|----------|--------|--------|
| strata crossover | 0        | 1      | Total  |
| 0                | 48,403   | 7,581  | 55,984 |
|                  | 95.08    | 70.72  | 90.85  |
| 1                | 2,502    | 3,138  | 5,640  |
|                  | 4.92     | 29.28  | 9.15   |
| Total            | 50,905   | 10,719 | 61,624 |
|                  | 100.00   | 100.00 | 100.00 |

```
. cs died_0_90_strata crossover infected if agecat==3
```

|          | infected |           |       |
|----------|----------|-----------|-------|
|          | Exposed  | Unexposed | Total |
| Cases    | 3138     | 2502      | 5640  |
| Noncases | 7581     | 48403     | 55984 |

|                                    | Total | 10719          | 50905    | 61624                |
|------------------------------------|-------|----------------|----------|----------------------|
| Risk                               |       | .2927512       | .0491504 | .0915228             |
|                                    |       | Point estimate |          | [95% conf. interval] |
| Risk difference                    |       | .2436008       |          | .2347844 .2524172    |
| Risk ratio                         |       | 5.956235       |          | 5.675809 6.250515    |
| Attr. frac. ex.                    |       | .8321087       |          | .8238137 .8400132    |
| Attr. frac. pop                    |       | .4629711       |          |                      |
| chi2(1) = 6319.45 Pr>chi2 = 0.0000 |       |                |          |                      |

```
. * 180-day mortality
. tab died_91_180_strata crossover infected if
alive_day91_strata case control==1 & agecat==3, co
```

```
+-----+
| Key |
|-----|
| frequency |
| column percentage |
+-----+
```

| died_91_180_strata crossover | infected |        | Total  |
|------------------------------|----------|--------|--------|
|                              | 0        | 1      |        |
| 0                            | 39,317   | 6,563  | 45,880 |
|                              | 95.48    | 93.81  | 95.24  |
| 1                            | 1,862    | 433    | 2,295  |
|                              | 4.52     | 6.19   | 4.76   |
| Total                        | 41,179   | 6,996  | 48,175 |
|                              | 100.00   | 100.00 | 100.00 |

```
. cs died_91_180_strata crossover infected if
alive_day91_strata case control==1 & agecat==3
```

|          | infected       |           | Total                |
|----------|----------------|-----------|----------------------|
|          | Exposed        | Unexposed |                      |
| Cases    | 433            | 1862      | 2295                 |
| Noncases | 6563           | 39317     | 45880                |
| Total    | 6996           | 41179     | 48175                |
| Risk     | .0618925       | .0452172  | .0476388             |
|          | Point estimate |           | [95% conf. interval] |

```

Risk difference | .0166753 | .0106829 .0226677
Risk ratio | 1.368782 | 1.236728 1.514935
Attr. frac. ex. | .2694234 | .191415 .3399058
Attr. frac. pop | .0508324 |
+-----+
chi2(1) = 36.65 Pr>chi2 = 0.0000

```

```

. * 365-day mortality
. tab died_181_365_stratacrossover infected if
alive_day181_stratacasecontrol==1 & agecat==3, co

```

```

+-----+
| Key |
|-----|
| frequency |
| column percentage |
+-----+

```

| died_181_3         | infected         |                 | Total            |
|--------------------|------------------|-----------------|------------------|
| 65_stratacrossover | 0                | 1               |                  |
| 0                  | 33,246<br>90.91  | 5,584<br>89.86  | 38,830<br>90.76  |
| 1                  | 3,324<br>9.09    | 630<br>10.14    | 3,954<br>9.24    |
| Total              | 36,570<br>100.00 | 6,214<br>100.00 | 42,784<br>100.00 |

```

. cs died_181_365_stratacrossover infected if
alive_day181_stratacasecontrol==1 & agecat==3

```

|                                 | infected       |           | Total                |
|---------------------------------|----------------|-----------|----------------------|
|                                 | Exposed        | Unexposed |                      |
| Cases                           | 630            | 3324      | 3954                 |
| Noncases                        | 5584           | 33246     | 38830                |
| Total                           | 6214           | 36570     | 42784                |
| Risk                            | .101384        | .0908942  | .0924177             |
|                                 | Point estimate |           | [95% conf. interval] |
| Risk difference                 | .0104898       |           | .0024275 .0185521    |
| Risk ratio                      | 1.115407       |           | 1.028818 1.209283    |
| Attr. frac. ex.                 | .103466        |           | .0280109 .1730636    |
| Attr. frac. pop                 | .0164855       |           |                      |
| +-----+                         |                |           |                      |
| chi2(1) = 6.97 Pr>chi2 = 0.0083 |                |           |                      |

```
.
. * 730-day mortality
. tab died_366_730_stratacrossover infected if
alive_day366_stratacasecontrol==1 & agecat==3, co
```

```
+-----+
| Key |
|-----|
| frequency |
| column percentage |
+-----+
```

| died_366_730_stratacrossover | infected |        | Total  |
|------------------------------|----------|--------|--------|
|                              | 0        | 1      |        |
| 0                            | 23,496   | 4,087  | 27,583 |
|                              | 92.55    | 92.42  | 92.53  |
| 1                            | 1,891    | 335    | 2,226  |
|                              | 7.45     | 7.58   | 7.47   |
| Total                        | 25,387   | 4,422  | 29,809 |
|                              | 100.00   | 100.00 | 100.00 |

```
. cs died_366_730_stratacrossover infected if
alive_day366_stratacasecontrol==1 & agecat==3
```

|                                 | infected       |           | Total                |
|---------------------------------|----------------|-----------|----------------------|
|                                 | Exposed        | Unexposed |                      |
| Cases                           | 335            | 1891      | 2226                 |
| Noncases                        | 4087           | 23496     | 27583                |
| Total                           | 4422           | 25387     | 29809                |
| Risk                            | .0757576       | .0744869  | .0746754             |
|                                 | Point estimate |           | [95% conf. interval] |
| Risk difference                 | .0012706       |           | -.0071708 .0097121   |
| Risk ratio                      | 1.017058       |           | .9095618 1.13726     |
| Attr. frac. ex.                 | .0167724       |           | -.0994306 .1206934   |
| Attr. frac. pop                 | .0025241       |           |                      |
| +-----+                         |                |           |                      |
| chi2(1) = 0.09 Pr>chi2 = 0.7667 |                |           |                      |

```
.
. *-----
. * Wave 1
. *-----
```

```
.
. * 90-day mortality
. tab died_0_90_stratacrossover infected if wave==1, co
```

```

+-----+
| Key          |
+-----+
| frequency    |
| column percentage |
+-----+

```

| died_0_90_  | infected |        | Total   |
|-------------|----------|--------|---------|
| stratacross | 0        | 1      |         |
| sover       |          |        |         |
| 0           | 88,652   | 16,271 | 104,923 |
|             | 98.63    | 90.40  | 97.26   |
| 1           | 1,231    | 1,728  | 2,959   |
|             | 1.37     | 9.60   | 2.74    |
| Total       | 89,883   | 17,999 | 107,882 |
|             | 100.00   | 100.00 | 100.00  |

```
. cs died_0_90_stratacrossover infected if wave==1
```

|                                    | infected       |           | Total                |
|------------------------------------|----------------|-----------|----------------------|
|                                    | Exposed        | Unexposed |                      |
| Cases                              | 1728           | 1231      | 2959                 |
| Noncases                           | 16271          | 88652     | 104923               |
| Total                              | 17999          | 89883     | 107882               |
| Risk                               | .0960053       | .0136956  | .0274281             |
|                                    | Point estimate |           | [95% conf. interval] |
| Risk difference                    | .0823098       |           | .0779394 .0866801    |
| Risk ratio                         | 7.009949       |           | 6.527367 7.528209    |
| Attr. frac. ex.                    | .8573456       |           | .8467989 .8671663    |
| Attr. frac. pop                    | .5006736       |           |                      |
| chi2(1) = 3808.57 Pr>chi2 = 0.0000 |                |           |                      |

```

. * 180-day mortality
. tab died_91_180_stratacrossover infected if
alive_day91_stratacasecontrol==1 & wave==1, co

```

```

+-----+
| Key          |
+-----+
| frequency    |
| column percentage |
+-----+

```

| died_91_18<br>0_stratacr<br>osrossover | infected         |                  | Total            |
|----------------------------------------|------------------|------------------|------------------|
|                                        | 0                | 1                |                  |
| 0                                      | 74,892<br>98.82  | 15,120<br>98.32  | 90,012<br>98.73  |
| 1                                      | 897<br>1.18      | 259<br>1.68      | 1,156<br>1.27    |
| Total                                  | 75,789<br>100.00 | 15,379<br>100.00 | 91,168<br>100.00 |

. cs died\_91\_180\_stratacrossover infected if  
alive\_day91\_stratacasecontrol==1 & wave==1

|                 | infected       |           | Total                  |
|-----------------|----------------|-----------|------------------------|
|                 | Exposed        | Unexposed |                        |
| Cases           | 259            | 897       | 1156                   |
| Noncases        | 15120          | 74892     | 90012                  |
| Total           | 15379          | 75789     | 91168                  |
| Risk            | .0168411       | .0118355  | .0126799               |
|                 | Point estimate |           | [95% conf. interval]   |
| Risk difference | .0050057       |           | .0028311 .0071802      |
| Risk ratio      | 1.422936       |           | 1.240554 1.632131      |
| Attr. frac. ex. | .2972278       |           | .1939088 .3873041      |
| Attr. frac. pop | .0665934       |           |                        |
| chi2(1) =       |                |           | 25.59 Pr>chi2 = 0.0000 |

. \* 365-day mortality  
. tab died\_181\_365\_stratacrossover infected if  
alive\_day181\_stratacasecontrol==1 & wave==1, co

```
+-----+
| Key          |
|-----|
| frequency    |
| column percentage |
+-----+
```

| died_181_3<br>65_stratac<br>rosrossover | infected        |                 | Total           |
|-----------------------------------------|-----------------|-----------------|-----------------|
|                                         | 0               | 1               |                 |
| 0                                       | 66,998<br>97.90 | 13,740<br>97.77 | 80,738<br>97.88 |

|        |        |        |        |
|--------|--------|--------|--------|
| 1      | 1,437  | 314    | 1,751  |
|        | 2.10   | 2.23   | 2.12   |
| -----+ |        |        |        |
| Total  | 68,435 | 14,054 | 82,489 |
|        | 100.00 | 100.00 | 100.00 |

. cs died\_181\_365\_stratacrossover infected if  
alive\_day181\_stratacasecontrol==1 & wave==1

|                 | infected       |           | Total                 |
|-----------------|----------------|-----------|-----------------------|
|                 | Exposed        | Unexposed |                       |
| -----+          |                |           |                       |
| Cases           | 314            | 1437      | 1751                  |
| Noncases        | 13740          | 66998     | 80738                 |
| -----+          |                |           |                       |
| Total           | 14054          | 68435     | 82489                 |
| Risk            | .0223424       | .020998   | .0212271              |
|                 | Point estimate |           | [95% conf. interval]  |
| -----+          |                |           |                       |
| Risk difference | .0013444       |           | -.0013248 .0040135    |
| Risk ratio      | 1.064023       |           | .9430077 1.200569     |
| Attr. frac. ex. | .0601711       |           | -.0604367 .1670617    |
| Attr. frac. pop | .0107902       |           |                       |
| -----+          |                |           |                       |
|                 | chi2(1) =      |           | 1.01 Pr>chi2 = 0.3139 |

. \* 730-day mortality  
. tab died\_366\_730\_stratacrossover infected if  
alive\_day366\_stratacasecontrol==1 & wave==1, co

```
+-----+
| Key          |
|-----|
| frequency    |
| column percentage |
+-----+
```

| died_366_7         | infected |        | Total  |
|--------------------|----------|--------|--------|
| 30_stratacrossover | 0        | 1      |        |
| -----+             |          |        |        |
| 0                  | 50,774   | 10,658 | 61,432 |
|                    | 96.89    | 96.69  | 96.85  |
| -----+             |          |        |        |
| 1                  | 1,630    | 365    | 1,995  |
|                    | 3.11     | 3.31   | 3.15   |
| -----+             |          |        |        |
| Total              | 52,404   | 11,023 | 63,427 |
|                    | 100.00   | 100.00 | 100.00 |

. cs died\_366\_730\_stratacrossover infected if

alive\_day366\_stratacasecontrol==1 & wave==1

|                 | infected       |                      | Total                 |
|-----------------|----------------|----------------------|-----------------------|
|                 | Exposed        | Unexposed            |                       |
| Cases           | 365            | 1630                 | 1995                  |
| Noncases        | 10658          | 50774                | 61432                 |
| Total           | 11023          | 52404                | 63427                 |
| Risk            | .0331126       | .0311045             | .0314535              |
|                 | Point estimate | [95% conf. interval] |                       |
| Risk difference | .0020081       | -.001648             | .0056641              |
| Risk ratio      | 1.064559       | .952123              | 1.190273              |
| Attr. frac. ex. | .0606442       | -.0502844            | .1598568              |
| Attr. frac. pop | .0110953       |                      |                       |
| chi2(1) =       |                |                      | 1.21 Pr>chi2 = 0.2722 |

```
.
. *-----
. * Wave 2
. *-----
.
. * 90-day mortality
. tab died_0_90_stratacrossover infected if wave==2, co
```

```
+-----+
| Key |
|-----|
| frequency |
| column percentage |
+-----+
```

| died_0_90_ | infected |        | Total   |
|------------|----------|--------|---------|
| stratacros | 0        | 1      |         |
| sover      |          |        |         |
| 0          | 208,921  | 39,805 | 248,726 |
|            | 99.09    | 94.22  | 98.27   |
| 1          | 1,925    | 2,441  | 4,366   |
|            | 0.91     | 5.78   | 1.73    |
| Total      | 210,846  | 42,246 | 253,092 |
|            | 100.00   | 100.00 | 100.00  |

```
. cs died_0_90_stratacrossover infected if wave==2
```

|  | infected |           | Total |
|--|----------|-----------|-------|
|  | Exposed  | Unexposed |       |



|                   |                |          |                      |
|-------------------|----------------|----------|----------------------|
| Cases             | 2441           | 1925     | 4366                 |
| Noncases          | 39805          | 208921   | 248726               |
| -----+-----+----- |                |          |                      |
| Total             | 42246          | 210846   | 253092               |
| Risk              | .0577806       | .0091299 | .0172506             |
|                   | Point estimate |          | [95% conf. interval] |
| -----+-----+----- |                |          |                      |
| Risk difference   | .0486507       |          | .046389 .0509124     |
| Risk ratio        | 6.328734       |          | 5.967197 6.712175    |
| Attr. frac. ex.   | .8419905       |          | .8324171 .851017     |
| Attr. frac. pop   | .470751        |          |                      |
| -----+-----+----- |                |          |                      |
|                   | chi2(1) =      | 4913.64  | Pr>chi2 = 0.0000     |

```
.
. * 180-day mortality
. tab died_91_180_stratacrossover infected if
alive_day91_stratacasecontrol==1 & wave==2, co
```

```
+-----+
| Key |
|-----|
| frequency |
| column percentage |
+-----+
```

| died_91_180_stratacrossover | infected |        | Total   |
|-----------------------------|----------|--------|---------|
|                             | 0        | 1      |         |
| 0                           | 177,688  | 35,869 | 213,557 |
|                             | 99.16    | 98.97  | 99.13   |
| 1                           | 1,506    | 373    | 1,879   |
|                             | 0.84     | 1.03   | 0.87    |
| Total                       | 179,194  | 36,242 | 215,436 |
|                             | 100.00   | 100.00 | 100.00  |

```
. cs died_91_180_stratacrossover infected if
alive_day91_stratacasecontrol==1 & wave==2
```

|          | infected |           | Total    |
|----------|----------|-----------|----------|
|          | Exposed  | Unexposed |          |
| Cases    | 373      | 1506      | 1879     |
| Noncases | 35869    | 177688    | 213557   |
| Total    | 36242    | 179194    | 215436   |
| Risk     | .0102919 | .0084043  | .0087218 |

|                 | Point estimate | [95% conf. interval] |          |
|-----------------|----------------|----------------------|----------|
| Risk difference | .0018876       | .0007659             | .0030094 |
| Risk ratio      | 1.224603       | 1.093982             | 1.37082  |
| Attr. frac. ex. | .1834085       | .0859078             | .2705095 |
| Attr. frac. pop | .0364084       |                      |          |

chi2(1) = 12.42 Pr>chi2 = 0.0004

```
. * 365-day mortality
. tab died_181_365_strata crossover infected if
alive_day181_strata case control == 1 & wave == 2, co
```

```
+-----+
| Key |
|-----|
| frequency |
| column percentage |
+-----+
```

| died_181_365_strata crossover | infected |        | Total   |
|-------------------------------|----------|--------|---------|
|                               | 0        | 1      |         |
| 0                             | 151,753  | 30,995 | 182,748 |
|                               | 98.44    | 98.49  | 98.45   |
| 1                             | 2,407    | 474    | 2,881   |
|                               | 1.56     | 1.51   | 1.55    |
| Total                         | 154,160  | 31,469 | 185,629 |
|                               | 100.00   | 100.00 | 100.00  |

```
. cs died_181_365_strata crossover infected if
alive_day181_strata case control == 1 & wave == 2
```

|          | infected |           | Total    |
|----------|----------|-----------|----------|
|          | Exposed  | Unexposed |          |
| Cases    | 474      | 2407      | 2881     |
| Noncases | 30995    | 151753    | 182748   |
| Total    | 31469    | 154160    | 185629   |
| Risk     | .0150624 | .0156136  | .0155202 |

  

|                 | Point estimate | [95% conf. interval] |          |
|-----------------|----------------|----------------------|----------|
| Risk difference | -.0005512      | -.0020324            | .00093   |
| Risk ratio      | .9646972       | .8748682             | 1.06375  |
| Prev. frac. ex. | .0353028       | -.0637496            | .1251318 |
| Prev. frac. pop | .0059848       |                      |          |

chi2(1) = 0.52 Pr>chi2 = 0.4710

```
. * 730-day mortality
. tab died_366_730_strata crossover infected if
alive_day366_strata case control==1 & wave==2, co
```

```
+-----+
| Key |
|-----|
| frequency |
| column percentage |
+-----+
```

| died_366_730_strata crossover | infected          |                  | Total             |
|-------------------------------|-------------------|------------------|-------------------|
|                               | 0                 | 1                |                   |
| 0                             | 130,557<br>98.21  | 27,143<br>98.33  | 157,700<br>98.23  |
| 1                             | 2,386<br>1.79     | 461<br>1.67      | 2,847<br>1.77     |
| Total                         | 132,943<br>100.00 | 27,604<br>100.00 | 160,547<br>100.00 |

```
. cs died_366_730_strata crossover infected if
alive_day366_strata case control==1 & wave==2
```

|                 | infected       |           | Total                |
|-----------------|----------------|-----------|----------------------|
|                 | Exposed        | Unexposed |                      |
| Cases           | 461            | 2386      | 2847                 |
| Noncases        | 27143          | 130557    | 157700               |
| Total           | 27604          | 132943    | 160547               |
| Risk            | .0167005       | .0179475  | .0177331             |
|                 | Point estimate |           | [95% conf. interval] |
| Risk difference | -.0012471      |           | -.0029188 .0004246   |
| Risk ratio      | .9305162       |           | .8429198 1.027216    |
| Prev. frac. ex. | .0694838       |           | -.0272157 .1570802   |
| Prev. frac. pop | .0119468       |           |                      |

chi2(1) = 2.04 Pr>chi2 = 0.1531

```
. *-----
. * Wave 3
. *-----
.
```

```
. * 90-day mortality
. tab died_0_90_stratacrossover infected if wave==3, co
```

```
+-----+
| Key          |
|-----|
| frequency    |
| column percentage |
+-----+
```

| died_0_90_ | infected |         | Total   |
|------------|----------|---------|---------|
| stratacros | 0        | 1       |         |
| sover      |          |         |         |
| 0          | 624,665  | 119,481 | 744,146 |
|            | 99.06    | 94.45   | 98.29   |
| 1          | 5,956    | 7,023   | 12,979  |
|            | 0.94     | 5.55    | 1.71    |
| Total      | 630,621  | 126,504 | 757,125 |
|            | 100.00   | 100.00  | 100.00  |

```
. cs died_0_90_stratacrossover infected if wave==3
```

|                 | infected       |           | Total                |
|-----------------|----------------|-----------|----------------------|
|                 | Exposed        | Unexposed |                      |
| Cases           | 7023           | 5956      | 12979                |
| Noncases        | 119481         | 624665    | 744146               |
| Total           | 126504         | 630621    | 757125               |
| Risk            | .055516        | .0094447  | .0171425             |
|                 | Point estimate |           | [95% conf. interval] |
| Risk difference | .0460714       |           | .0447872 .0473556    |
| Risk ratio      | 5.878035       |           | 5.681583 6.081279    |
| Attr. frac. ex. | .8298751       |           | .8239927 .8355609    |
| Attr. frac. pop | .4490495       |           |                      |

```
chi2(1) = 13274.04 Pr>chi2 = 0.0000
```

```
. * 180-day mortality
. tab died_91_180_stratacrossover infected if
alive_day91_stratacasecontrol==1 & wave==3, co
```

```
+-----+
| Key          |
|-----|
| frequency    |
| column percentage |
+-----+
```

+-----+

| died_91_18        | infected |         | Total   |
|-------------------|----------|---------|---------|
| 0_stratacrossover | 0        | 1       |         |
| 0                 | 534,978  | 108,276 | 643,254 |
|                   | 99.18    | 99.10   | 99.16   |
| 1                 | 4,439    | 986     | 5,425   |
|                   | 0.82     | 0.90    | 0.84    |
| Total             | 539,417  | 109,262 | 648,679 |
|                   | 100.00   | 100.00  | 100.00  |

. cs died\_91\_180\_stratacrossover infected if  
alive\_day91\_stratacasecontrol==1 & wave==3

|                 | infected       |           | Total                 |
|-----------------|----------------|-----------|-----------------------|
|                 | Exposed        | Unexposed |                       |
| Cases           | 986            | 4439      | 5425                  |
| Noncases        | 108276         | 534978    | 643254                |
| Total           | 109262         | 539417    | 648679                |
| Risk            | .0090242       | .0082293  | .0083632              |
|                 | Point estimate |           | [95% conf. interval]  |
| Risk difference | .0007949       |           | .0001846 .0014053     |
| Risk ratio      | 1.096598       |           | 1.023795 1.174577     |
| Attr. frac. ex. | .0880884       |           | .0232421 .1486296     |
| Attr. frac. pop | .0160102       |           |                       |
| +-----          |                |           |                       |
|                 |                | chi2(1) = | 6.92 Pr>chi2 = 0.0085 |

.  
. \* 365-day mortality  
. tab died\_181\_365\_stratacrossover infected if  
alive\_day181\_stratacasecontrol==1 & wave==3, co

+-----+  
| Key |  
|-----|  
| frequency |  
| column percentage |  
+-----+

| died_181_3         | infected |         | Total   |
|--------------------|----------|---------|---------|
| 65_stratacrossover | 0        | 1       |         |
| 0                  | 502,902  | 102,864 | 605,766 |

|       |         |         |         |
|-------|---------|---------|---------|
|       | 98.24   | 98.41   | 98.27   |
| 1     | 9,011   | 1,657   | 10,668  |
|       | 1.76    | 1.59    | 1.73    |
| Total | 511,913 | 104,521 | 616,434 |
|       | 100.00  | 100.00  | 100.00  |

. cs died\_181\_365\_stratacrossover infected if  
alive\_day181\_stratacasecontrol==1 & wave==3

|                                  | infected       |           | Total                |
|----------------------------------|----------------|-----------|----------------------|
|                                  | Exposed        | Unexposed |                      |
| Cases                            | 1657           | 9011      | 10668                |
| Noncases                         | 102864         | 502902    | 605766               |
| Total                            | 104521         | 511913    | 616434               |
| Risk                             | .0158533       | .0176026  | .017306              |
|                                  | Point estimate |           | [95% conf. interval] |
| Risk difference                  | -.0017493      |           | -.0025879 -.0009108  |
| Risk ratio                       | .9006211       |           | .8550155 .9486593    |
| Prev. frac. ex.                  | .0993789       |           | .0513407 .1449845    |
| Prev. frac. pop                  | .0168504       |           |                      |
| chi2(1) = 15.62 Pr>chi2 = 0.0001 |                |           |                      |

. \* 730-day mortality  
. tab died\_366\_730\_stratacrossover infected if  
alive\_day366\_stratacasecontrol==1 & wave==3, co

```
+-----+
| Key          |
|-----|
| frequency    |
| column percentage |
+-----+
```

| died_366_7             | infected |        | Total   |
|------------------------|----------|--------|---------|
| 30_stratac<br>rossover | 0        | 1      |         |
| 0                      | 391,408  | 81,685 | 473,093 |
|                        | 99.10    | 99.26  | 99.13   |
| 1                      | 3,561    | 613    | 4,174   |
|                        | 0.90     | 0.74   | 0.87    |
| Total                  | 394,969  | 82,298 | 477,267 |
|                        | 100.00   | 100.00 | 100.00  |

```
. cs died_366_730_stratacrossover infected if
alive_day366_stratacasecontrol==1 & wave==3
```

|                 | infected        |           | Total                |
|-----------------|-----------------|-----------|----------------------|
|                 | Exposed         | Unexposed |                      |
| Cases           | 613             | 3561      | 4174                 |
| Noncases        | 81685           | 391408    | 473093               |
| Total           | 82298           | 394969    | 477267               |
| Risk            | .0074485        | .0090159  | .0087456             |
|                 | Point estimate  |           | [95% conf. interval] |
| Risk difference | -.0015674       |           | -.0022246 -.0009101  |
| Risk ratio      | .8261563        |           | .7585497 .8997885    |
| Prev. frac. ex. | .1738437        |           | .1002115 .2414503    |
| Prev. frac. pop | .0299769        |           |                      |
|                 | chi2(1) = 19.30 |           | Pr>chi2 = 0.0000     |

```
.
. *-----
. * PP2 Constructing TTE & Mortality Variables for Cox Model
. *-----
.
. * censor matched strata at the time of an infection crossover;
. * patients in a crossover strata who die prior to the infection
crossover
. * will have their TTE recorded as their individual date of death
.
. * censor everyone at the earliest censoring time of anyone in the
matched
. * strata, using earliest time of death, study end, or crossover
. gsort matchgroupnumber propensityscoreabsdiffrank -case
.
. * create a new tte variable from the crossover tte variable, censoring
everyone
. * in the strata at the time of the earliest infection crossover
. by matchgroupnumber: egen mkg_tte_730_strata = min(tte_730_cross) if
isfutureinfectedcontrol==1
(1,108,158 missing values generated)
.
. by matchgroupnumber: egen tte_730_strata = min(mkg_tte_730_strata)
(630,819 missing values generated)
.
. * if someone dies prior to the time of the earliest censoring date for
the strata,
. * recode THAT individual with the date of their death
. replace tte_730_strata = tte_730_cross if indextodeath_caseindex
```

```

!missing(tte_730_strata) & ///
>
indextodeath_caseindex
indextodeath_caseindex<730
(23,020 real changes made)

.
. * any strata not censored at crossover has a tte as done previously
(at time
. * of study end) or at time of death
. replace tte_730_strata = tte_730_cross if tte_730_strata == .
(630,819 real changes made)

.
. * code the mortality variable from the crossover version above
. gen died_730_strata = died_730_cross

.
. * modify mortality variable to account for censoring at infection
crossover
. replace died_730_strata = 0 if indextodeath_caseindex>tte_730_strata &
!missing(indextodeath_caseindex)
(11,552 real changes made)

.
. * drop variables we no longer need
. drop mkg_tte_730_strata

.
. * PP2 - mortality and excess mortality among cases
. tab died_730_strata infected, co chi // (Abstract & Results)

```

```

+-----+
| Key          |
|-----|
| frequency    |
| column percentage |
+-----+

```

| died_730_s<br>trata | infected            |                   | Total               |
|---------------------|---------------------|-------------------|---------------------|
|                     | 0                   | 1                 |                     |
| 0                   | 995,024<br>95.91    | 189,933<br>91.29  | 1,184,957<br>95.14  |
| 1                   | 42,399<br>4.09      | 18,128<br>8.71    | 60,527<br>4.86      |
| Total               | 1,037,423<br>100.00 | 208,061<br>100.00 | 1,245,484<br>100.00 |

Pearson chi2(1) = 8.0e+03 Pr = 0.000



```

. di 42399/1037423 //4.09 mortality rate of comparators (Abstract &
Results)
.04086954

. di 208061*0.04086954 //mortality rate of comparators applied to cases
= 8503 deaths
8503.3574

. di 18128-8503.3574 //9625 excess deaths
9624.6426

.
. *-----
. * PP2 Kaplan Meier Curves
. *-----
.
. ** Creating Variables for KM **
.
. * alive on index day, censored at 90 days
. gen tte_0_90_strata = ttstudyend

. replace tte_0_90_strata = 90 if ttstudyend>90
(1,245,484 real changes made)

. replace tte_0_90_strata = indextodeath_caseindex ///
> if indextodeath_caseindex
indextodeath_caseindex<90
(23,659 real changes made)

. replace tte_0_90_strata = tte_730_strata if tte_730_strata<=90
(94,745 real changes made)

.
. * alive on Day 91, censored at 180 days
. gen tte_91_180_strata = ttstudyend

. replace tte_91_180_strata = 180 if ttstudyend>180
(1,245,484 real changes made)

. replace tte_91_180_strata = indextodeath_caseindex if ///
> indextodeath_caseindex
inrange(indextodeath_caseindex, 91, 180)
(12,195 real changes made)

. replace tte_91_180_strata = tte_730_strata if inrange(tte_730_strata,
91, 180)
(66,788 real changes made)

. replace tte_91_180_strata = . if alive_day91==0
(23,814 real changes made, 23,814 to missing)

.
. * alive on Day 181, censored at 365 days
. gen tte_181_365_strata = ttstudyend

```

```

. replace tte_181_365_strata = 365 if ttstudyend>365
(1,191,419 real changes made)

. replace tte_181_365_strata = indextodeath_caseindex if ///
>                                     indextodeath_caseindex
inrange(indextodeath_caseindex, 181, 365)
(25,921 real changes made)

. replace tte_181_365_strata = tte_730_strata if inrange(tte_730_strata,
181, 365)
(196,086 real changes made)

. replace tte_181_365_strata = . if alive_day181==0
(36,173 real changes made, 36,173 to missing)

.
. * alive on Day 366, censored at 730 days
. gen tte_366_730_strata = ttstudyend

. replace tte_366_730_strata = 730 if ttstudyend>730
(13,998 real changes made)

. replace tte_366_730_strata = indextodeath_caseindex if ///
>                                     indextodeath_caseindex
inrange(indextodeath_caseindex, 366, 730)
(20,049 real changes made)

. replace tte_366_730_strata = tte_730_strata if inrange(tte_730_strata,
366, 730)
(164,239 real changes made)

. replace tte_366_730_strata = . if alive_day366==0
(114,374 real changes made, 114,374 to missing)

.
.
. ** Figure 1: KM Curves **
.
. * 0-90 Days
. preserve

.         recode tte_0_90_strata (0=0.5)
(377 changes made to tte_0_90_strata)

.         stset tte_0_90_strata , failure(died_0_90_stratacrossover==1)

Survival-time data settings

         Failure event: died_0_90_stratacrossover==1
Observed time interval: (0, tte_0_90_strata]
Exit on or before: failure
-----

```

```

--
1,245,484 total observations
      0 exclusions
-----
--
1,245,484 observations remaining, representing
      22,129 failures in single-record/single-failure data
106542617 total analysis time at risk and under observation
                                         At risk from t =
0
                                         Earliest observed entry t =
0
                                         Last observed exit t =
90

.          *sts test infected, logrank
.          sts graph, by(infected) name(survival090, replace)      ///
>          legend(pos(5) ring(0) rows(2) region(lcolor(none))    ///
>          size(small) label(1 "Comparators")
label(2 "COVID-19 Cases"))    ///
>          graphregion(color(white)) bgcolor(white) title("Days
0-90", color(black) size(medium)) ///
>          xtitle("") ///
>          plotlopts(lpattern(solid) lcolor("0 114 178")) ///
>          plot2opts(lpattern(dash) lcolor("230 159 0")) ///
>          tlabel(, labsize(small)) ylabel(, labsize(small))

      Failure _d: died_0_90_stratacrossover==1
      Analysis time _t: tte_0_90_strata

.          *graph save "survival090" "Figures\survival090.gph", replace
. restore

.
. * 91-180 Days
. preserve

.          stset tte_91_180_strata ,
failure(died_91_180_stratacrossover==1)

Survival-time data settings

      Failure event: died_91_180_stratacrossover==1
Observed time interval: (0, tte_91_180_strata]
      Exit on or before: failure
-----
--
1,245,484 total observations
      23,814 event time missing (tte_91_180_strata>=.)          PROBABLE
ERROR
-----
--
1,221,670 observations remaining, representing

```



Earliest observed entry t =

0

Last observed exit t =

365

```
.      *sts test infected, logrank
.      tab _d infected, co chi // (Results: 1.37% (1.4) vs 1.51%
(1.5))
```

```
+-----+
| Key          |
|-----|
| frequency    |
| column percentage |
+-----+
```

| failure; 0 | if censored         | if infected 0     | if infected 1       | Total |
|------------|---------------------|-------------------|---------------------|-------|
| 0          | 1,000,322<br>98.49  | 190,940<br>98.63  | 1,191,262<br>98.51  |       |
| 1          | 15,387<br>1.51      | 2,662<br>1.37     | 18,049<br>1.49      |       |
| Total      | 1,015,709<br>100.00 | 193,602<br>100.00 | 1,209,311<br>100.00 |       |

Pearson chi2(1) = 21.6519 Pr = 0.000

```
.      sts graph, by(infected) name(survival181365, replace) ///
>      legend(pos(5) ring(0) rows(2) region(lcolor(none)) ///
>      size(small) label(1 "Comparators")
label(2 "COVID-19 Cases")) ///
>      graphregion(color(white)) bgcolor(white) title("Days
181-365", color(black) size(medium)) ///
>      xtitle("") ///
>      plotlopts(lpattern(solid) lcolor("0 114 178")) ///
>      plot2opts(lpattern(dash) lcolor("230 159 0")) ///
>      ylabel(0.9 (0.02) 1.0, labsize(small)) ///
>      tmin(181) tlabel(180 (40) 380, labsize(small))
```

```
Failure _d: died_181_365_stratacrossover==1
Analysis time _t: tte_181_365_strata
```

```
.      *graph save "survival181365" "Figures\survival181365.gph",
replace
.      restore
```

```
.
. * 366-730 Days
. preserve
```

```
.      stset tte_366_730_strata ,
failure(died_366_730_stratacrossover==1)
```

Survival-time data settings

```
      Failure event: died_366_730_stratacrossover==1
Observed time interval: (0, tte_366_730_strata]
Exit on or before: failure
```

```
-----
--
1,245,484  total observations
 114,374  event time missing (tte_366_730_strata>=.)      PROBABLE
ERROR
-----
```

```
--
1,131,110  observations remaining, representing
 10,364  failures in single-record/single-failure data
555436295  total analysis time at risk and under observation
                                         At risk from t =
0
                                         Earliest observed entry t =
0
                                         Last observed exit t =
730
```

```
.      *sts test infected, logrank
.      tab _d infected, co chi // (Results: 0.81% (0.8) vs 0.94%
(0.9))
```

```
+-----+
| Key          |
|-----|
| frequency    |
| column percentage |
+-----+
```

| failure; 0 | infected          |                   | Total               |
|------------|-------------------|-------------------|---------------------|
|            | 0                 | 1                 |                     |
| 0          | 940,563<br>99.06  | 180,183<br>99.19  | 1,120,746<br>99.08  |
| 1          | 8,890<br>0.94     | 1,474<br>0.81     | 10,364<br>0.92      |
| Total      | 949,453<br>100.00 | 181,657<br>100.00 | 1,131,110<br>100.00 |

Pearson chi2(1) = 26.2051 Pr = 0.000

```

.      sts graph, by(infected) name(survival366730, replace) ///
>          legend(pos(5) ring(0) rows(2) region(lcolor(none)) ///
>              size(small) label(1 "Comparators")
label(2 "COVID-19 Cases"))    ///
>          graphregion(color(white)) bgcolor(white) title("Days
366-730", color(black) size(medium)) ///
>          xtitle("") ///
>          plotlopts(lpattern(solid) lcolor("0 114 178")) ///
>          plot2opts(lpattern(dash) lcolor("230 159 0"))    ///
>          ylabel(0.9 (0.02) 1.0, labsize(small)) ///
>          tmin(366) tlabel(365 450 550 650 730, labsize(small))

```

```

      Failure _d: died_366_730_stratacrossover==1
      Analysis time _t: tte_366_730_strata

```

```

.      *graph save "survival366730" "Figures\survival366730.gph",
replace
. restore

```

```

.
. * 0-730 Days
. preserve

```

```

.      recode tte_730_strata (0=0.5)
(377 changes made to tte_730_strata)

```

```

.      stset tte_730_strata , failure(died_730_strata)

```

Survival-time data settings

```

      Failure event: died_730_strata!=0 & died_730_strata<.
      Observed time interval: (0, tte_730_strata]
      Exit on or before: failure

```

```

-----
--
1,245,484 total observations
      0 exclusions
-----

```

```

--
1,245,484 observations remaining, representing
      60,527 failures in single-record/single-failure data
477586587 total analysis time at risk and under observation
                                         At risk from t =
0
                                         Earliest observed entry t =
0
                                         Last observed exit t =
730

```

```

.      stdescribe

```

```

      Failure _d: died_730_strata
      Analysis time _t: tte_730_strata

```

| -----              | ----- Per subject ----- |          |     |        |
|--------------------|-------------------------|----------|-----|--------|
| Category           | Total                   | Mean     | Min | Median |
| Max                | -----                   |          |     |        |
| -----              |                         |          |     |        |
| Number of subjects | 1245484                 |          |     |        |
| Number of records  | 1245484                 | 1        | 1   | 1      |
| 1                  |                         |          |     |        |
| Entry time (first) |                         | 0        | 0   | 0      |
| 0                  |                         |          |     |        |
| Exit time (final)  |                         | 383.4546 | .5  | 423    |
| 730                |                         |          |     |        |
| Subjects with gap  | 0                       |          |     |        |
| Time on gap        | 0                       |          |     |        |
| Time at risk       | 4.776e+08               | 383.4546 | .5  | 423    |
| 730                |                         |          |     |        |
| Failures           | 60527                   | .0485972 | 0   | 0      |
| 1                  |                         |          |     |        |

```

.          stdescribe if infected==1

          Failure _d: died_730_strata
          Analysis time _t: tte_730_strata

```

| -----              | ----- Per subject ----- |          |     |        |
|--------------------|-------------------------|----------|-----|--------|
| Category           | Total                   | Mean     | Min | Median |
| Max                | -----                   |          |     |        |
| -----              |                         |          |     |        |
| Number of subjects | 208061                  |          |     |        |
| Number of records  | 208061                  | 1        | 1   | 1      |
| 1                  |                         |          |     |        |
| Entry time (first) |                         | 0        | 0   | 0      |
| 0                  |                         |          |     |        |
| Exit time (final)  |                         | 368.0602 | .5  | 417    |
| 730                |                         |          |     |        |
| Subjects with gap  | 0                       |          |     |        |
| Time on gap        | 0                       |          |     |        |
| Time at risk       | 76578980                | 368.0602 | .5  | 417    |
| 730                |                         |          |     |        |
| Failures           | 18128                   | .0871283 | 0   | 0      |
| 1                  |                         |          |     |        |



-----

. stdescribe if infected==0

Failure \_d: died\_730\_strata  
Analysis time \_t: tte\_730\_strata

| Category           | Total     | Mean     | Min | Median |
|--------------------|-----------|----------|-----|--------|
| Number of subjects | 1037423   |          |     |        |
| Number of records  | 1037423   | 1        | 1   | 1      |
| Entry time (first) |           | 0        | 0   | 0      |
| Exit time (final)  |           | 386.542  | .5  | 424    |
| Subjects with gap  | 0         |          |     |        |
| Time on gap        | 0         |          |     |        |
| Time at risk       | 4.010e+08 | 386.542  | .5  | 424    |
| Failures           | 42399     | .0408695 | 0   | 0      |

```
. *sts test infected, logrank
. sts graph, by(infected) name(survival0730, replace) ///
> legend(pos(5) ring(0) rows(2) region(lcolor(none)) ///
> size(small) label(1 "Comparators")
label(2 "COVID-19 Cases")) ///
> graphregion(color(white)) bgcolor(white) title("Days
0-730", color(black) size(medium)) ///
> xtitle("") ///
> plotlopts(lpattern(solid) lcolor("0 114 178")) ///
> plot2opts(lpattern(dash) lcolor("230 159 0")) ///
> tlabel(, labszsize(small)) ylabel(, labszsize(small))
```

Failure \_d: died\_730\_strata  
Analysis time \_t: tte\_730\_strata

```
. *graph save "survival0730" "Figures\survival0730.gph", replace
. restore
```

. \*-----

. \* Table 2: PP-Unweighted Cox Models

```

. *-----
.
. * Overall
.
. preserve

.
.       stset tte_730_strata, failure(died_730_strata) id(uniq_patid)

```

Survival-time data settings

```

        ID variable: uniq_patid
        Failure event: died_730_strata!=0 & died_730_strata<.
Observed time interval: (tte_730_strata[_n-1], tte_730_strata]
        Exit on or before: failure

```

```

-----
--
1,245,484  total observations
      377  observations end on or before enter()
-----

```

```

--
1,245,107  observations remaining, representing
1,245,107  subjects
      60,186  failures in single-failure-per-subject data
477586398  total analysis time at risk and under observation
                                                At risk from t =
0
                                                Earliest observed entry t =
0
                                                Last observed exit t =
730

```

```

.       stcox infected, efron vce(cluster patienticn)
strata(matchgroupnumber)

```

```

        Failure _d: died_730_strata
Analysis time _t: tte_730_strata
        ID variable: uniq_patid

```

```

Iteration 0:   log pseudolikelihood = -105656.04
Iteration 1:   log pseudolikelihood = -102322.95
Iteration 2:   log pseudolikelihood = -102012.93
Iteration 3:   log pseudolikelihood = -102012.62
Refining estimates:
Iteration 0:   log pseudolikelihood = -102012.62

```

Stratified Cox regression with Efron method for ties  
Strata variable: matchgroupnumber

```

No. of subjects = 1,245,107                Number of obs =
1,245,107
No. of failures =      60,186
Time at risk     = 477586398

```

9220.08 Wald chi2(1) =  
 Log pseudolikelihood = -102012.62 Prob > chi2 =  
 0.0000

(Std. err. adjusted for 1,091,916 clusters in patienticn)

```
-----
-----
          |
          | Robust
          | std. err.
          | z      P>|z|      [95% conf.
interval] +-----
-----
    infected | 2.270487 .0193893 96.02 0.000 2.2328
2.308809
-----
-----
```

```
.
. restore
.
.
. * By period
.
. preserve
.
. * stset dataset with new censoring and failure variables
. stset tte_730_strata, failure(died_730_strata) id(uniq_patid)
```

Survival-time data settings

```
ID variable: uniq_patid
Failure event: died_730_strata!=0 & died_730_strata<.
Observed time interval: (tte_730_strata[_n-1], tte_730_strata)
Exit on or before: failure
```

```
-----
--
1,245,484 total observations
377 observations end on or before enter()
-----
```

```
-----
--
1,245,107 observations remaining, representing
1,245,107 subjects
60,186 failures in single-failure-per-subject data
477586398 total analysis time at risk and under observation
At risk from t =
0
Earliest observed entry t =
0
Last observed exit t =
```

730

```
.          stsplit period, at(0 90 180 365 730)
(2,978,471 observations (episodes) created)

.
.          * create new interaction variables after splitting data
.          gen timeinfected_0_90 = infected * (tte_730_strata<=90)

.          gen timeinfected_91_180 = infected * (tte_730_strata>90 &
tte_730_strata<=180)

.          gen timeinfected_181_365 = infected * (tte_730_strata>180 &
tte_730_strata<=365)

.          gen timeinfected_366_730 = infected * (tte_730_strata>365 &
tte_730_strata<=730)
```

```
.
.          *-----
.          * Main Model - Unadj.
.          *-----
.
.          stcox    timeinfected_0_90 timeinfected_91_180
timeinfected_181_365  ///
>                                timeinfected_366_730
///
>                                , efron vce(cluster patienticn)
strata(matchgroupnumber)
```

```
          Failure _d: died_730_strata
Analysis time _t: tte_730_strata
ID variable: uniq_patid
```

```
Iteration 0:    log pseudolikelihood = -105656.04
Iteration 1:    log pseudolikelihood = -99350.316
Iteration 2:    log pseudolikelihood = -97168.116
Iteration 3:    log pseudolikelihood = -97023.527
Iteration 4:    log pseudolikelihood = -97023.522
Refining estimates:
Iteration 0:    log pseudolikelihood = -97023.522
```

```
Stratified Cox regression with Efron method for ties
Strata variable: matchgroupnumber
```

```
No. of subjects = 1,245,107                                Number of obs =
4,223,578
No. of failures =    60,186
Time at risk    = 477586398

22888.39                                                    Wald chi2(4) =
Log pseudolikelihood = -97023.522                          Prob > chi2 =
0.0000
```

(Std. err. adjusted for 1,091,916 clusters

in patienticn)

```
-----  
-----  
_t | Haz. ratio   Robust  
          |          | std. err.     z     P>|z|     [95%  
conf. interval]-----+-----  
-----  
timeinfected_0_90 | 6.472236   .0799848   151.12   0.000  
6.317352   6.630917  
timeinfected_91_180 | 1.164641   .0279073    6.36   0.000  
1.111209   1.220643  
timeinfected_181_365 | .9202852   .0187548   -4.08   0.000  
.8842509   .9577879  
timeinfected_366_730 | .8847994   .0234548   -4.62   0.000  
.8400027   .931985  
-----  
-----
```

```
.  
. restore  
  
. .  
. log close  
  name:  
  log:   ...\\LTO Mortality\\Logs\\analysis_lto_mortality_20230605.log  
  log type: text  
  closed on:   5 Jun 2023, 16:24:17  
-----  
-----  
-----
```
