# Supplementary material for: Late Mortality After COVID-19 Infection Among US Veterans vs Risk-Matched Comparators: A 2-Year Cohort Analysis
Source: PubMed Central journal article supplement (PMC10442778; doi:10.1001/jamainternmed.2023.3587), 2023-08-21
Supplement: jamainternmed-e233587-s004.pdf [file jamainternmed-e233587-s004.pdf]

\*First name, last name, and suffix (if applicable) are required and will appear in PubMed.

| <b>*Group Name(s): VA HSR&amp;D COVID-19 Observational Research Collaboratory (CORC)</b> |                   |                              |                  |                                  |                                          |                                                         |                                                                                            |
|------------------------------------------------------------------------------------------|-------------------|------------------------------|------------------|----------------------------------|------------------------------------------|---------------------------------------------------------|--------------------------------------------------------------------------------------------|
| <b>*First Name and Middle Initial(s)</b>                                                 | <b>*Last Name</b> | <b>*Suffix (eg, Jr, III)</b> | Academic Degrees | Institution                      | Location (city, state/province, country) | Role or Contribution, eg, chair, principal investigator | Group (if more than 1 Group listed in the byline) and/or Subgroup (eg, Steering Committee) |
| Andrew                                                                                   | Admon             |                              | MD               | VA Ann Arbor Healthcare System   | Ann Arbor, MI                            | Site Collaborator                                       | <b>CORC Participating Collaborators</b>                                                    |
| Kathleen                                                                                 | Akgun             |                              | MD               | VA Connecticut Healthcare System | West Haven, CT                           | Site Collaborator                                       | <b>CORC Participating Collaborators</b>                                                    |
| Stacy                                                                                    | Anderson          |                              | BA               | VA Ann Arbor Healthcare System   | Ann Arbor, MI                            | Research Assistant                                      | <b>CORC Participating Collaborators</b>                                                    |
| Mihaela                                                                                  | Aslan             |                              | PhD              | VA Connecticut Healthcare System | West Haven, CT                           | Site Collaborator                                       | <b>CORC Participating Collaborators</b>                                                    |
| David                                                                                    | Au                |                              | MD               | VA Puget Sound Healthcare System | Seattle, WA                              | Physician Consultant                                    | <b>CORC Participating Collaborators</b>                                                    |
| Lisa                                                                                     | Backus            |                              | MD               | VA Palo Alto Healthcare System   | Palo Alto, CA                            | Site Collaborator                                       | <b>CORC Participating Collaborators</b>                                                    |
| Kristina                                                                                 | Bajema            |                              | MD               | VA Portland Healthcare System    | Portland, OR                             | Site Collaborator                                       | <b>CORC Participating Collaborators</b>                                                    |
| Aaron                                                                                    | Baraff            |                              | MS               | VA Puget Sound Healthcare System | Seattle, WA                              | Data Analyst                                            | <b>CORC Participating Collaborators</b>                                                    |
| Lisa                                                                                     | Batten            |                              | MD               | VA Puget Sound Healthcare System | Seattle, WA                              | Project Manager                                         | <b>CORC Participating Collaborators</b>                                                    |
| Theodore                                                                                 | Berkowitz         |                              | MS               | VA Durham Healthcare System      | Durham, NC                               | Data Manager                                            | <b>CORC Participating Collaborators</b>                                                    |
| Taylor                                                                                   | Bernstein         |                              | MPH              | VA Ann Arbor Healthcare System   | Ann Arbor, MI                            | Research Assistant                                      | <b>CORC Participating Collaborators</b>                                                    |
| Kristin                                                                                  | Berry Wyatt       |                              | PhD              | VA Puget Sound Healthcare System | Seattle, WA                              | Data Manager                                            | <b>CORC Participating Collaborators</b>                                                    |
| Joseph                                                                                   | Bogdan            |                              | BA               | VA Durham Healthcare System      | Durham, NC                               | Project Manager                                         | <b>CORC Participating Collaborators</b>                                                    |
| Hayden                                                                                   | Bosworth          |                              | PhD              | VA Durham Healthcare System      | Durham, NC                               | Site Collaborator                                       | <b>CORC Participating Collaborators</b>                                                    |

Supplementary Online Material: Nonauthor Collaborators

\*First name, last name, and suffix (if applicable) are required and will appear in PubMed.

| *First Name and Middle Initial(s) | *Last Name | *Suffix (eg, Jr, III) | Academic Degrees | Institution                              | Location (city, state/province, country) | Role or Contribution, eg, chair, principal investigator | Group (if more than 1 Group listed in the byline) and/or Subgroup (eg, Steering Committee) |
|-----------------------------------|------------|-----------------------|------------------|------------------------------------------|------------------------------------------|---------------------------------------------------------|--------------------------------------------------------------------------------------------|
| Nathan                            | Boucher    |                       | PhD              | VA Durham Healthcare System              | Durham, NC                               | Site Collaborator                                       | <b>CORC Participating Collaborators</b>                                                    |
| Nicholas                          | Burwick    |                       | MD               | VA Puget Sound Healthcare System         | Seattle, WA                              | Physician Consultant                                    | <b>CORC Participating Collaborators</b>                                                    |
| Aissa                             | Cabrales   |                       | BA               | VA Ann Arbor Healthcare System           | Ann Arbor, MI                            | Research Assistant                                      | <b>CORC Participating Collaborators</b>                                                    |
| Jennifer                          | Cano       |                       | MPH              | VA Ann Arbor Healthcare System           | Ann Arbor, MI                            | Data Analyst                                            | <b>CORC Participating Collaborators</b>                                                    |
| Wen                               | Chai       |                       | BS               | VA Durham                                | Durham, NC                               | Data Analyst                                            | <b>CORC Participating Collaborators</b>                                                    |
| Jason                             | Chen       |                       | MD               | VA Portland Healthcare System            | Portland, OR                             | Site Collaborator                                       | <b>CORC Participating Collaborators</b>                                                    |
| Kei-Hoi                           | Cheung     |                       | PhD              | VA Connecticut Healthcare System         | West Haven, CT                           | Site Collaborator                                       | <b>CORC Participating Collaborators</b>                                                    |
| Kristina                          | Crothers   |                       | MD               | VA Puget Sound Healthcare System         | Seattle, WA                              | Site Collaborator                                       | <b>CORC Participating Collaborators</b>                                                    |
| Jeffrey                           | Curtis     |                       | MD               | VA Ann Arbor Healthcare System           | Ann Arbor, MI                            | Physician Consultant                                    | <b>CORC Participating Collaborators</b>                                                    |
| Marie                             | Davis      |                       | MD               | VA Puget Sound Healthcare System         | Seattle, WA                              | Physician Consultant                                    | <b>CORC Participating Collaborators</b>                                                    |
| Emily                             | Del Monico |                       | MPH              | VA Ann Arbor Healthcare System           | Ann Arbor, MI                            | Research Assistant                                      | <b>CORC Participating Collaborators</b>                                                    |
| Aram                              | Dobalian   |                       | PhD, JD          | VA Greater Los Angeles Healthcare System | Los Angeles, CA                          | Physician Consultant                                    | <b>CORC Participating Collaborators</b>                                                    |
| Jacob                             | Doll       |                       | MD               | VA Puget Sound Healthcare System         | Seattle, WA                              | Physician Consultant                                    | <b>CORC Participating Collaborators</b>                                                    |
| Jason                             | Dominitz   |                       | MD               | VA Puget Sound Healthcare System         | Seattle, WA                              | Physician Consultant                                    | <b>CORC Participating Collaborators</b>                                                    |
| McKenna                           | Eastment   |                       | MD               | VA Puget Sound Healthcare System         | Seattle, WA                              | Physician Consultant                                    | <b>CORC Participating Collaborators</b>                                                    |

Supplementary Online Material: Nonauthor Collaborators

\*First name, last name, and suffix (if applicable) are required and will appear in PubMed.

| *First Name and Middle Initial(s) | *Last Name | *Suffix (eg, Jr, III) | Academic Degrees | Institution                              | Location (city, state/province, country) | Role or Contribution, eg, chair, principal investigator | Group (if more than 1 Group listed in the byline) and/or Subgroup (eg, Steering Committee) |
|-----------------------------------|------------|-----------------------|------------------|------------------------------------------|------------------------------------------|---------------------------------------------------------|--------------------------------------------------------------------------------------------|
| Vincent                           | Fan        |                       | MD               | VA Puget Sound Healthcare System         | Seattle, WA                              | Physician Consultant                                    | <b>CORC Participating Collaborators</b>                                                    |
| Jacqueline                        | Ferguson   |                       | PhD              | VA Palo Alto Healthcare System           | Palo Alto, CA                            | Site Collaborator                                       |                                                                                            |
| Breanna                           | Floyd      |                       | MPH              | VA Durham Healthcare System              | Durham, NC                               | Site Collaborator                                       |                                                                                            |
| Alexandra                         | Fox        |                       | MS               | VA Puget Sound Healthcare System         | Seattle, WA                              | Data Analyst                                            |                                                                                            |
| Matthew                           | Goetz      |                       | MD               | VA Greater Los Angeles Healthcare System | Los Angeles, CA                          | Physician Consultant                                    |                                                                                            |
| Diana                             | Govier     |                       | PhD              | VA Portland Healthcare System            | Portland, OR                             | Data Analyst                                            |                                                                                            |
| Pamela                            | Green      |                       | PhD              | VA Puget Sound Healthcare System         | Seattle, WA                              | Data Manager                                            |                                                                                            |
| Susan Nicole                      | Hastings   |                       | MD               | VA Durham Healthcare System              | Durham, NC                               | Physician Consultant                                    |                                                                                            |
| Katie                             | Hauschildt |                       | PhD              | VA Ann Arbor Healthcare System           | Ann Arbor, MI                            | Site Collaborator                                       |                                                                                            |
| Eric                              | Hawkins    |                       | PhD              | VA Puget Sound Healthcare System         | Seattle, WA                              | Site Collaborator                                       |                                                                                            |
| Paul                              | Hebert     |                       | PhD              | VA Puget Sound Healthcare System         | Seattle, WA                              | Site Collaborator                                       |                                                                                            |
| Mark                              | Helfand    |                       | PhD              | VA Portland Healthcare System            | Portland, OR                             | Site Collaborator                                       |                                                                                            |
| Alex                              | Hickok     |                       | MS               | VA Portland Healthcare System            | Portland, OR                             | Data Analyst                                            |                                                                                            |
| Dana                              | Horowitz   |                       | MSW              | VA Ann Arbor Healthcare System           | Ann Arbor, MI                            | Research Assistant                                      |                                                                                            |
| Catherine                         | Hough      |                       | MD               | VA Portland Healthcare System            | Portland, OR                             | Physician Consultant                                    |                                                                                            |

Supplementary Online Material: Nonauthor Collaborators

\*First name, last name, and suffix (if applicable) are required and will appear in PubMed.

| *First Name and Middle Initial(s) | *Last Name | *Suffix (eg, Jr, III) | Academic Degrees | Institution                              | Location (city, state/province, country) | Role or Contribution, eg, chair, principal investigator | Group (if more than 1 Group listed in the byline) and/or Subgroup (eg, Steering Committee) |
|-----------------------------------|------------|-----------------------|------------------|------------------------------------------|------------------------------------------|---------------------------------------------------------|--------------------------------------------------------------------------------------------|
| Elaine                            | Hu         |                       | MS               | VA Puget Sound Healthcare System         | Seattle, WA                              | Data Analyst                                            | <b>CORC Participating Collaborators</b>                                                    |
| Kevin                             | Ikuta      |                       | MD               | VA Greater Los Angeles Healthcare System | Los Angeles, CA                          | Physician Consultant                                    |                                                                                            |
| Barbara                           | Jones      |                       | MD               | VA Salt Lake City Healthcare System      | Salt Lake City, UT                       | Site Collaborator                                       |                                                                                            |
| Makoto                            | Jones      |                       | MD               | VA SLC Healthcare System                 | Salt Lake City, UT                       | Physician Consultant                                    |                                                                                            |
| Lee                               | Kamphuis   |                       | MPH              | VA Ann Arbor Healthcare System           | Ann Arbor, MI                            | Project Manager                                         |                                                                                            |
| Brystana                          | Kaufman    |                       | PhD              | VA Durham Healthcare System              | Durham, NC                               | Site Collaborator                                       |                                                                                            |
| Sara                              | Knight     |                       | PhD              | VA Salt Lake City Healthcare System      | Salt Lake City, UT                       | Site Collaborator                                       |                                                                                            |
| Anna                              | Korpak     |                       | PhD              | VA Puget Sound Healthcare System         | Seattle, WA                              | Data Analyst                                            |                                                                                            |
| Peggy                             | Korpela    |                       | MPH              | VA Ann Arbor Healthcare System           | Ann Arbor, MI                            | Research Assistant                                      |                                                                                            |
| Kyle                              | Kumbier    |                       | MS               | VA Ann Arbor Healthcare System           | Ann Arbor, MI                            | Data Analyst                                            |                                                                                            |
| Kenneth                           | Langa      |                       | MD               | VA Ann Arbor Healthcare System           | Ann Arbor, MI                            | Physician Consultant                                    |                                                                                            |
| Ryan                              | Laundry    |                       | BS               | VA Puget Sound Healthcare System         | Seattle, WA                              | Data Analyst                                            |                                                                                            |
| Stacy                             | Lavin      |                       | PhD              | VA Durham Healthcare System              | Durham, NC                               | Site Collaborator                                       |                                                                                            |
| Yuli                              | Li         |                       | MS               | VA Connecticut Healthcare System         | West Haven, CT                           | Site Collaborator                                       |                                                                                            |
| Jennifer                          | Linguist   |                       | PhD              | VA Durham Healthcare System              | Durham, NC                               | Data Analyst                                            |                                                                                            |

Supplementary Online Material: Nonauthor Collaborators

\*First name, last name, and suffix (if applicable) are required and will appear in PubMed.

| *First Name and Middle Initial(s) | *Last Name   | *Suffix (eg, Jr, III) | Academic Degrees | Institution                              | Location (city, state/province, country) | Role or Contribution, eg, chair, principal investigator | Group (if more than 1 Group listed in the byline) and/or Subgroup (eg, Steering Committee) |
|-----------------------------------|--------------|-----------------------|------------------|------------------------------------------|------------------------------------------|---------------------------------------------------------|--------------------------------------------------------------------------------------------|
| Holly                             | McCready     |                       | BS               | VA Portland Healthcare System            | Portland, OR                             | Project Manager                                         | <b>CORC Participating Collaborators</b>                                                    |
| Martha                            | Michel       |                       | PhD              | VA Puget Sound Healthcare System         | Seattle, WA                              | Data Analyst                                            |                                                                                            |
| Amy                               | Miles        |                       | MPH              | VA Durham Healthcare System              | Durham, NC                               | Site Collaborator                                       |                                                                                            |
| Jessie                            | Milne        |                       | MPH              | VA Ann Arbor Healthcare System           | Ann Arbor, MI                            | Research Assistant                                      |                                                                                            |
| Max                               | Monahan      |                       | MPH              | VA Ann Arbor Healthcare System           | Ann Arbor, MI                            | Project Manager                                         |                                                                                            |
| Daniel                            | Morelli      |                       | BA               | VA Puget Sound Healthcare System         | Seattle, WA                              | Data Analyst                                            |                                                                                            |
| Pradeep                           | Mutalik      |                       | MD               | VA Connecticut Healthcare System         | West Haven, CT                           | Site Collaborator                                       |                                                                                            |
| Jennifer                          | Naylor       |                       | MD               | VA Durham Healthcare System              | Durham, NC                               | Site Collaborator                                       |                                                                                            |
| Meike                             | Neiderhausen |                       | PhD              | VA Portland Healthcare System            | Portland, OR                             | Data Analyst                                            |                                                                                            |
| Summer                            | Newell       |                       | PhD              | VA Portland Healthcare System            | Portland, OR                             | Site Collaborator                                       |                                                                                            |
| Shannon                           | Nugent       |                       | PhD              | VA Portland Healthcare System            | Portland, OR                             | Site Collaborator                                       |                                                                                            |
| Michael                           | Ong          |                       | MD, PhD          | VA Greater Los Angeles Healthcare System | Los Angeles, CA                          | Physician Consultant                                    |                                                                                            |
| Thomas                            | Osborne      |                       | MD               | VA Palo Alto Healthcare System           | Palo Alto, CA                            | Site Collaborator                                       |                                                                                            |
| Matthew                           | Peterson     |                       | MS               | VA Portland Healthcare System            | Portland, OR                             | Data Manager                                            |                                                                                            |
| Alexander                         | Peterson     |                       | MS               | VA Puget Sound Healthcare System         | Seattle, WA                              | Data Analyst                                            |                                                                                            |

Supplementary Online Material: Nonauthor Collaborators

\*First name, last name, and suffix (if applicable) are required and will appear in PubMed.

| *First Name and Middle Initial(s) | *Last Name       | *Suffix (eg, Jr, III) | Academic Degrees | Institution                      | Location (city, state/province, country) | Role or Contribution, eg, chair, principal investigator | Group (if more than 1 Group listed in the byline) and/or Subgroup (eg, Steering Committee) |
|-----------------------------------|------------------|-----------------------|------------------|----------------------------------|------------------------------------------|---------------------------------------------------------|--------------------------------------------------------------------------------------------|
| Nallakkandi                       | Rajeevan         |                       | PhD              | VA Connecticut Healthcare System | West Haven, CT                           | Site Collaborator                                       | <b>CORC Participating Collaborators</b>                                                    |
| Ashok                             | Reddy            |                       | MD               | VA Puget Sound Healthcare System | Seattle, WA                              | Physician Consultant                                    | <b>CORC Participating Collaborators</b>                                                    |
| Marylena                          | Rouse            |                       | BS               | VA Ann Arbor Healthcare System   | Ann Arbor, MI                            | Research Assistant                                      | <b>CORC Participating Collaborators</b>                                                    |
| Mazhgan                           | Rowneki          |                       | MPH              | VA Portland Healthcare System    | Portland, OR                             | Data Manager                                            | <b>CORC Participating Collaborators</b>                                                    |
| Som                               | Saha             |                       | MD               | VA Portland Healthcare System    | Portland, OR                             | Physician Consultant                                    | <b>CORC Participating Collaborators</b>                                                    |
| Sameer                            | Saini            |                       | MD               | VA Ann Arbor Healthcare System   | Ann Arbor, MI                            | Physician Consultant                                    | <b>CORC Participating Collaborators</b>                                                    |
| Javeed                            | Shah             |                       | MD               | VA Puget Sound Healthcare System | Seattle, WA                              | Physician Consultant                                    | <b>CORC Participating Collaborators</b>                                                    |
| Troy                              | Shahoumian       |                       | PhD              | VA Palo Alto Healthcare System   | Palo Alto, CA                            | Data Analyst                                            | <b>CORC Participating Collaborators</b>                                                    |
| Aasma                             | Shaukat          |                       | MD               | VA Minneapolis Healthcare System | Minneapolis, MN                          | Physician Consultant                                    | <b>CORC Participating Collaborators</b>                                                    |
| Megan                             | Shepherd-Banigan |                       | PhD              | VA Durham Healthcare System      | Durham, NC                               | Site Collaborator                                       | <b>CORC Participating Collaborators</b>                                                    |
| Whitney                           | Showalter        |                       | PhD              | VA Puget Sound Healthcare System | Seattle, WA                              | Project Manager                                         | <b>CORC Participating Collaborators</b>                                                    |
| Christopher                       | Slatore          |                       | MD               | VA Portland Healthcare System    | Portland, OR                             | Physician Consultant                                    | <b>CORC Participating Collaborators</b>                                                    |
| Nicholas                          | Smith            |                       | PhD              | VA Puget Sound Healthcare System | Seattle, WA                              | Site Collaborator                                       | <b>CORC Participating Collaborators</b>                                                    |
| Battista                          | Smith            |                       | MPH              | VA Durham Healthcare System      | Durham, NC                               | Project Manager                                         | <b>CORC Participating Collaborators</b>                                                    |
| Pardeep                           | Suri             |                       | MD               | VA Puget Sound Healthcare System | Seattle, WA                              | Physician Consultant                                    | <b>CORC Participating Collaborators</b>                                                    |

Supplementary Online Material: Nonauthor Collaborators

\*First name, last name, and suffix (if applicable) are required and will appear in PubMed.

| *First Name and Middle Initial(s) | *Last Name | *Suffix (eg, Jr, III) | Academic Degrees | Institution                      | Location (city, state/province, country) | Role or Contribution, eg, chair, principal investigator | Group (if more than 1 Group listed in the byline) and/or Subgroup (eg, Steering Committee) |
|-----------------------------------|------------|-----------------------|------------------|----------------------------------|------------------------------------------|---------------------------------------------------------|--------------------------------------------------------------------------------------------|
| Jeremy                            | Sussman    |                       | MD               | VA Ann Arbor Healthcare System   | Ann Arbor, MI                            | Physician Consultant                                    | <b>CORC Participating Collaborators</b>                                                    |
| Yumie                             | Takata     |                       | PhD              | VA Portland Healthcare System    | Portland, OR                             | Site Collaborator                                       | <b>CORC Participating Collaborators</b>                                                    |
| Alan                              | Teo        |                       | MD               | VA Portland Healthcare System    | Portland, OR                             | Site Collaborator                                       | <b>CORC Participating Collaborators</b>                                                    |
| Eva                               | Thomas     |                       | MPH              | VA Puget Sound Healthcare System | Seattle, WA                              | Data Analyst                                            | <b>CORC Participating Collaborators</b>                                                    |
| Laura                             | Thomas     |                       | MPH/MS<br>W      | VA Ann Arbor Healthcare System   | Ann Arbor, MI                            | Project Manager                                         | <b>CORC Participating Collaborators</b>                                                    |
| Anais                             | Tuepker    |                       | PhD              | VA Portland Healthcare System    | Portland, OR                             | Site Collaborator                                       | <b>CORC Participating Collaborators</b>                                                    |
| Zachary                           | Veigulis   |                       | MS               | VA Palo Alto Healthcare System   | Palo Alto, CA                            | Data Analyst                                            | <b>CORC Participating Collaborators</b>                                                    |
| Elizabeth                         | Vig        |                       | MD               | VA Puget Sound Healthcare System | Seattle, WA                              | Site Collaborator                                       | <b>CORC Participating Collaborators</b>                                                    |
| Kelly                             | Vranas     |                       | MD               | VA Portland Healthcare System    | Portland, OR                             | Site Collaborator                                       | <b>CORC Participating Collaborators</b>                                                    |
| Xiao Qing                         | Wang       |                       | MPH              | VA Ann Arbor Healthcare System   | Ann Arbor, MI                            | Data Manager                                            | <b>CORC Participating Collaborators</b>                                                    |
| Katrina                           | Wicks      |                       | MPH              | VA Puget Sound Healthcare System | Seattle, WA                              | Data Analyst                                            | <b>CORC Participating Collaborators</b>                                                    |
| Kara                              | Winchell   |                       | MA               | VA Portland Healthcare System    | Portland, OR                             | Project Manager                                         | <b>CORC Participating Collaborators</b>                                                    |
| Edwin                             | Wong       |                       | PhD              | VA Puget Sound Healthcare System | Seattle, WA                              | Site Collaborator                                       | <b>CORC Participating Collaborators</b>                                                    |
| Chris                             | Woods      |                       | MD               | VA Durham Healthcare System      | Durham, NC                               | Physician Consultant                                    | <b>CORC Participating Collaborators</b>                                                    |
| Katherine                         | Wysham     |                       | MD               | VA Puget Sound Healthcare System | Seattle, WA                              | Physician Consultant                                    | <b>CORC Participating Collaborators</b>                                                    |

Supplementary Online Material: Nonauthor Collaborators

\*First name, last name, and suffix (if applicable) are required and will appear in PubMed.

| *First Name and Middle Initial(s) | *Last Name | *Suffix (eg, Jr, III) | Academic Degrees | Institution                      | Location (city, state/province, country) | Role or Contribution, eg, chair, principal investigator | Group (if more than 1 Group listed in the byline) and/or Subgroup (eg, Steering Committee) |
|-----------------------------------|------------|-----------------------|------------------|----------------------------------|------------------------------------------|---------------------------------------------------------|--------------------------------------------------------------------------------------------|
| Lei                               | Yan        |                       | PhD              | VA Connecticut Healthcare System | West Haven, CT                           | Site Collaborator                                       | <b>CORC Participating Collaborators</b>                                                    |
| Donna                             | Zulman     |                       | MD               | VA Palo Alto Healthcare System   | Palo Alto, CA                            | Physician Consultant                                    | <b>CORC Participating Collaborators</b>                                                    |
