# Supplementary material for: Late Mortality After COVID-19 Infection Among US Veterans vs Risk-Matched Comparators: A 2-Year Cohort Analysis
Source: PubMed Central journal article supplement (PMC10442778; doi:10.1001/jamainternmed.2023.3587), 2023-08-21
Supplement: jamainternmed-e233587-s005.pdf [file jamainternmed-e233587-s005.pdf]

## Data Sharing Statement

Iwashyna. Late Mortality After COVID-19 Infection Among US Veterans vs Risk-Matched Comparators. *JAMA Intern Med.* Published August 21, 2023.

doi:10.1001/jamainternmed.2023.3587

### Data

**Data available:** No

### Additional Information

**Explanation for why data not available:** Individual patient data will be made available with an approved Dept of Veterans Affairs data sharing plan
